# Supplementary material
Source: HighWire-hosted journal article supplement (https://erj.ersjournals.com/content/55/1/1901136)
Supplement: inline-supplementary-material-2 [file inline-supplementary-material-2.pdf]

## ERS guidelines on the diagnosis and treatment of chronic cough in adults and children

*Online-Only Supplement Part 2.*

### 2. Research Protocols

| Research Protocol, Question 1 |                                                                                                                                                                                                                                                                                             |
|-------------------------------|---------------------------------------------------------------------------------------------------------------------------------------------------------------------------------------------------------------------------------------------------------------------------------------------|
| <b>Question</b>               | Should chest CT be routinely performed on chronic cough patient with normal chest X-ray and physical examination?                                                                                                                                                                           |
| <b>Objective</b>              | To examine the diagnostic utility of chest CT in chronic cough patients with normal chest X-rays and physical examination                                                                                                                                                                   |
| <b>Criteria</b>               | Randomised trials or observational studies on the diagnostic utility of chest CT in chronic cough patients with normal chest X-rays and physical examination                                                                                                                                |
| <b>Population</b>             | Chronic cough patients with normal chest X-ray and physical examination                                                                                                                                                                                                                     |
| <b>Investigation</b>          | Chest CT scan                                                                                                                                                                                                                                                                               |
| <b>Comparison</b>             | None                                                                                                                                                                                                                                                                                        |
| <b>Outcomes</b>               | <ul style="list-style-type: none"><li>• Change in treatment decision (important)</li><li>• Sensitivity and specificity (important)</li><li>• Direct adverse events (important)</li></ul>                                                                                                    |
| <b>Search strategy</b>        | Chronic cough populations (regardless of underlying conditions) AND chest CT<br>Source: Pubmed/Medline, Embase and Cochrane Controlled Register of Trials (CENTRAL)<br>Study type: Randomised trial or observational study<br>Year: From inception to 2018 June<br>Language: Not restricted |

| Research Protocol, Question 2 |
|-------------------------------|
|-------------------------------|

|                        |                                                                                                                                                                                                                                                                                                                                                                        |
|------------------------|------------------------------------------------------------------------------------------------------------------------------------------------------------------------------------------------------------------------------------------------------------------------------------------------------------------------------------------------------------------------|
| <b>Question</b>        | Should FeNO/blood eosinophils be used to predict treatment response to corticosteroids/anti-leukotrienes in chronic cough?                                                                                                                                                                                                                                             |
| <b>Objective</b>       | To examine the utility of FeNO and blood eosinophils to predict treatment response to corticosteroids and anti-leukotrienes in chronic cough patients                                                                                                                                                                                                                  |
| <b>Criteria</b>        | Randomised trials or observational studies on the utility of FeNO and blood eosinophils to predict treatment response to corticosteroids and anti-leukotrienes in chronic cough patients                                                                                                                                                                               |
| <b>Population</b>      | Patients with chronic cough as the main complaint regardless of their underlying conditions                                                                                                                                                                                                                                                                            |
| <b>Investigation</b>   | FeNO or blood eosinophils                                                                                                                                                                                                                                                                                                                                              |
| <b>Comparison</b>      | None                                                                                                                                                                                                                                                                                                                                                                   |
| <b>Outcomes</b>        | <ul style="list-style-type: none"> <li>• Association with treatment response (important)</li> <li>• Change in treatment decision (important)</li> <li>• Sensitivity and specificity (important)</li> </ul>                                                                                                                                                             |
| <b>Search strategy</b> | <p>Chronic cough populations (regardless of underlying conditions) AND FeNO/blood eosinophils AND corticosteroids/anti-leukotrienes</p> <p>Source: Pubmed/Medline, Embase and Cochrane Controlled Register of Trials (CENTRAL)</p> <p>Study type: Randomised trial or observational study</p> <p>Year: From inception to 2018 June</p> <p>Language: Not restricted</p> |

| <b>Research Protocol, Question 3</b> |                                                                                                                                                                                        |
|--------------------------------------|----------------------------------------------------------------------------------------------------------------------------------------------------------------------------------------|
| <b>Question</b>                      | Should anti-asthmatic drugs (anti-inflammatory or bronchodilator drugs) be used to treat patients with chronic cough?                                                                  |
| <b>Objective</b>                     | To compare anti-asthmatic drugs (inhaled or systemic corticosteroids, inhaled bronchodilators, or anti-leukotrienes) to placebo for improving cough outcomes in chronic cough patients |

|                        |                                                                                                                                                                                                                                                                                                                                                                                                                                                                                                                                                                              |
|------------------------|------------------------------------------------------------------------------------------------------------------------------------------------------------------------------------------------------------------------------------------------------------------------------------------------------------------------------------------------------------------------------------------------------------------------------------------------------------------------------------------------------------------------------------------------------------------------------|
| <b>Criteria</b>        | Randomised placebo-controlled trials comparing anti-asthmatic drugs (inhaled or systemic corticosteroids, inhaled bronchodilators, or anti-leukotrienes) with placebo in adults or children with chronic cough as the main complaint (regardless of underlying conditions)                                                                                                                                                                                                                                                                                                   |
| <b>Population</b>      | Patients with chronic cough as the main complaint regardless of their underlying conditions                                                                                                                                                                                                                                                                                                                                                                                                                                                                                  |
| <b>Intervention</b>    | Inhaled or systemic corticosteroids, inhaled bronchodilators, or anti-leukotrienes                                                                                                                                                                                                                                                                                                                                                                                                                                                                                           |
| <b>Comparison</b>      | Placebo                                                                                                                                                                                                                                                                                                                                                                                                                                                                                                                                                                      |
| <b>Outcomes</b>        | <ul style="list-style-type: none"> <li>• Cough frequency (critical)</li> <li>• Cough severity VAS (critical)</li> <li>• Cough-specific quality-of-life questionnaire (critical)</li> <li>• Cough severity symptom score (important)</li> <li>• Generic quality-of-life questionnaire (important)</li> <li>• Incontinence (important)</li> <li>• Impact of cough on self-esteem, sleep, fatigue, depression, social isolation etc. (important)</li> <li>• Tussive response to cough challenge (important)</li> <li>• Treatment specific adverse events (important)</li> </ul> |
| <b>Search strategy</b> | <p>Chronic cough populations (regardless of underlying conditions) AND anti-asthmatic drugs (inhaled or systemic corticosteroids, inhaled bronchodilators, or anti-leukotrienes)</p> <p>Source: Pubmed/Medline, Embase and Cochrane Controlled Register of Trials (CENTRAL)</p> <p>Study type: Randomised placebo-controlled trial</p> <p>Year: From inception to 2018 June</p> <p>Language: Not restricted</p>                                                                                                                                                              |

|                        |                                                                                                                                                                                                                                                                                                                                                                                                                                                                                                                                                                              |
|------------------------|------------------------------------------------------------------------------------------------------------------------------------------------------------------------------------------------------------------------------------------------------------------------------------------------------------------------------------------------------------------------------------------------------------------------------------------------------------------------------------------------------------------------------------------------------------------------------|
| <b>Question</b>        | Should anti-acid drugs (PPIs and H2 antagonists) be used to treat patients with chronic cough?                                                                                                                                                                                                                                                                                                                                                                                                                                                                               |
| <b>Objective</b>       | To compare anti-acid drugs (PPIs and H2 antagonists) to placebo for improving cough outcomes in chronic cough patients                                                                                                                                                                                                                                                                                                                                                                                                                                                       |
| <b>Criteria</b>        | Randomised placebo-controlled trials comparing anti-acid drugs (PPIs and H2 antagonists) with placebo in adults or children with chronic cough as the main complaint (regardless of underlying conditions)                                                                                                                                                                                                                                                                                                                                                                   |
| <b>Population</b>      | Patients with chronic cough as the main complaint regardless of their underlying conditions                                                                                                                                                                                                                                                                                                                                                                                                                                                                                  |
| <b>Intervention</b>    | PPIs or H2 antagonists                                                                                                                                                                                                                                                                                                                                                                                                                                                                                                                                                       |
| <b>Comparison</b>      | Placebo                                                                                                                                                                                                                                                                                                                                                                                                                                                                                                                                                                      |
| <b>Outcomes</b>        | <ul style="list-style-type: none"> <li>• Cough frequency (critical)</li> <li>• Cough severity VAS (critical)</li> <li>• Cough-specific quality-of-life questionnaire (critical)</li> <li>• Cough severity symptom score (important)</li> <li>• Generic quality-of-life questionnaire (important)</li> <li>• Incontinence (important)</li> <li>• Impact of cough on self-esteem, sleep, fatigue, depression, social isolation etc. (important)</li> <li>• Tussive response to cough challenge (important)</li> <li>• Treatment specific adverse events (important)</li> </ul> |
| <b>Search strategy</b> | <p>Chronic cough populations (regardless of underlying conditions) AND anti-acid drugs (PPIs and H2 antagonists)</p> <p>Source: Pubmed/Medline, Embase and Cochrane Controlled Register of Trials (CENTRAL)</p> <p>Study type: Randomised placebo-controlled trial</p> <p>Year: From inception to 2018 June</p> <p>Language: Not restricted</p>                                                                                                                                                                                                                              |

| <b>Research Protocol, Question 5</b> |                                                                                                                                                                                                                                                                                                                                                                                                                                                                                                                                                                              |
|--------------------------------------|------------------------------------------------------------------------------------------------------------------------------------------------------------------------------------------------------------------------------------------------------------------------------------------------------------------------------------------------------------------------------------------------------------------------------------------------------------------------------------------------------------------------------------------------------------------------------|
| <b>Question</b>                      | Should drugs with pro-motility activity (reflux inhibitors, prokinetics, or macrolides with pro-motility activity) be used to treat patients with chronic cough?                                                                                                                                                                                                                                                                                                                                                                                                             |
| <b>Objective</b>                     | To compare drugs with pro-motility activity (reflux inhibitors, prokinetics, or macrolides with pro-motility activity) to placebo for improving cough outcomes in chronic cough patients                                                                                                                                                                                                                                                                                                                                                                                     |
| <b>Criteria</b>                      | Randomised placebo-controlled trials comparing drugs with pro-motility activity (reflux inhibitors, prokinetics, or macrolides with pro-motility activity) with placebo in adults or children with chronic cough as the main complaint (regardless of underlying conditions)                                                                                                                                                                                                                                                                                                 |
| <b>Population</b>                    | Patients with chronic cough as the main complaint regardless of their underlying conditions                                                                                                                                                                                                                                                                                                                                                                                                                                                                                  |
| <b>Intervention</b>                  | Reflux inhibitors, prokinetics, or macrolides with pro-motility activity                                                                                                                                                                                                                                                                                                                                                                                                                                                                                                     |
| <b>Comparison</b>                    | Placebo                                                                                                                                                                                                                                                                                                                                                                                                                                                                                                                                                                      |
| <b>Outcomes</b>                      | <ul style="list-style-type: none"> <li>• Cough frequency (critical)</li> <li>• Cough severity VAS (critical)</li> <li>• Cough-specific quality-of-life questionnaire (critical)</li> <li>• Cough severity symptom score (important)</li> <li>• Generic quality-of-life questionnaire (important)</li> <li>• Incontinence (important)</li> <li>• Impact of cough on self-esteem, sleep, fatigue, depression, social isolation etc. (important)</li> <li>• Tussive response to cough challenge (important)</li> <li>• Treatment specific adverse events (important)</li> </ul> |
| <b>Search strategy</b>               | Chronic cough populations (regardless of underlying conditions) AND drugs with pro-motility activity (reflux inhibitors, prokinetics, or macrolides with pro-motility activity)<br><br>Source: Pubmed/Medline, Embase and Cochrane Controlled Register of Trials (CENTRAL)                                                                                                                                                                                                                                                                                                   |

|  |                                                                                                                                 |
|--|---------------------------------------------------------------------------------------------------------------------------------|
|  | <p>Study type: Randomised placebo-controlled trial</p> <p>Year: From inception to 2018 June</p> <p>Language: Not restricted</p> |
|--|---------------------------------------------------------------------------------------------------------------------------------|

| Research Protocol, Question 6 |                                                                                                                                                                                                                                                                                                                                                                                                                                                                                                                                                                             |
|-------------------------------|-----------------------------------------------------------------------------------------------------------------------------------------------------------------------------------------------------------------------------------------------------------------------------------------------------------------------------------------------------------------------------------------------------------------------------------------------------------------------------------------------------------------------------------------------------------------------------|
| <b>Question</b>               | Which cough neuromodulatory agents (pregabalin, gabapentin, tricyclics, and opiates) should be used to treat patients with chronic cough?                                                                                                                                                                                                                                                                                                                                                                                                                                   |
| <b>Objective</b>              | To compare cough neuromodulatory agents (pregabalin, gabapentin, tricyclics, and opiates) to placebo for improving cough outcomes in adults with chronic cough                                                                                                                                                                                                                                                                                                                                                                                                              |
| <b>Criteria</b>               | Randomised placebo-controlled trials comparing cough neuromodulatory agents (pregabalin, gabapentin, tricyclics, and opiates) with placebo in adults with chronic cough as the main complaint (regardless of underlying conditions)                                                                                                                                                                                                                                                                                                                                         |
| <b>Population</b>             | Adult with chronic cough as the main complaint regardless of their underlying conditions                                                                                                                                                                                                                                                                                                                                                                                                                                                                                    |
| <b>Intervention</b>           | Pregabalin, gabapentin, tricyclics, or opiates                                                                                                                                                                                                                                                                                                                                                                                                                                                                                                                              |
| <b>Comparison</b>             | Placebo                                                                                                                                                                                                                                                                                                                                                                                                                                                                                                                                                                     |
| <b>Outcomes</b>               | <ul style="list-style-type: none"> <li>• Cough frequency (critical)</li> <li>• Cough severity VAS (critical)</li> <li>• Cough-specific quality-of-life questionnaire (critical)</li> <li>• Treatment specific adverse events (critical)</li> <li>• Cough severity symptom score (important)</li> <li>• Generic quality-of-life questionnaire (important)</li> <li>• Incontinence (important)</li> <li>• Impact of cough on self-esteem, sleep, fatigue, depression, social isolation etc. (important)</li> <li>• Tussive response to cough challenge (important)</li> </ul> |

|                        |                                                                                                                                                                                                                                                                                                                                                                                      |
|------------------------|--------------------------------------------------------------------------------------------------------------------------------------------------------------------------------------------------------------------------------------------------------------------------------------------------------------------------------------------------------------------------------------|
| <b>Search strategy</b> | <p>Chronic cough populations (regardless of underlying conditions) AND cough neuromodulatory agents (pregabalin, gabapentin, tricyclics, and opiates)</p> <p>Source: Pubmed/Medline, Embase and Cochrane Controlled Register of Trials (CENTRAL)</p> <p>Study type: Randomised placebo-controlled trial</p> <p>Year: From inception to 2018 June</p> <p>Language: Not restricted</p> |
|------------------------|--------------------------------------------------------------------------------------------------------------------------------------------------------------------------------------------------------------------------------------------------------------------------------------------------------------------------------------------------------------------------------------|

| <b>Research Protocol, Question 7</b> |                                                                                                                                                                                                                                                                                                                                                 |
|--------------------------------------|-------------------------------------------------------------------------------------------------------------------------------------------------------------------------------------------------------------------------------------------------------------------------------------------------------------------------------------------------|
| <b>Question</b>                      | Should non-pharmacological therapy (cough control therapy) be used to treat patients with chronic cough?                                                                                                                                                                                                                                        |
| <b>Objective</b>                     | To compare non-pharmacological therapy (cough control therapy) to placebo for improving cough outcomes in chronic cough patients                                                                                                                                                                                                                |
| <b>Criteria</b>                      | Randomised placebo-controlled trials comparing non-pharmacological therapy (cough control therapy) with placebo in adults or children with chronic cough as the main complaint (regardless of underlying conditions)                                                                                                                            |
| <b>Population</b>                    | Patients with chronic cough as the main complaint regardless of their underlying conditions                                                                                                                                                                                                                                                     |
| <b>Intervention</b>                  | Cough control therapy                                                                                                                                                                                                                                                                                                                           |
| <b>Comparison</b>                    | Placebo                                                                                                                                                                                                                                                                                                                                         |
| <b>Outcomes</b>                      | <ul style="list-style-type: none"> <li>• Cough frequency (critical)</li> <li>• Cough severity VAS (critical)</li> <li>• Cough-specific quality-of-life questionnaire (critical)</li> <li>• Cough severity symptom score (important)</li> <li>• Generic quality-of-life questionnaire (important)</li> <li>• Incontinence (important)</li> </ul> |

|                        |                                                                                                                                                                                                                                                                                                                                                           |
|------------------------|-----------------------------------------------------------------------------------------------------------------------------------------------------------------------------------------------------------------------------------------------------------------------------------------------------------------------------------------------------------|
|                        | <ul style="list-style-type: none"> <li>Impact of cough on self-esteem, sleep, fatigue, depression, social isolation etc. (important)</li> <li>Tussive response to cough challenge (important)</li> </ul>                                                                                                                                                  |
| <b>Search strategy</b> | <p>Chronic cough populations (regardless of underlying conditions) AND non-pharmacological therapy (cough control therapy)</p> <p>Source: Pubmed/Medline, Embase and Cochrane Controlled Register of Trials (CENTRAL)</p> <p>Study type: Randomised placebo-controlled trial</p> <p>Year: From inception to 2018 June</p> <p>Language: Not restricted</p> |

| <b>Research Protocol, Question 8</b> |                                                                                                                                                                                        |
|--------------------------------------|----------------------------------------------------------------------------------------------------------------------------------------------------------------------------------------|
| <b>Question</b>                      | Should a trial of antibiotics be used in children with chronic wet cough with normal chest x ray, normal spirometry and no warning signs?                                              |
| <b>Objective</b>                     | To compare a trial of antibiotics to placebo for improving cough outcomes in children with chronic cough                                                                               |
| <b>Criteria</b>                      | Randomised placebo-controlled trials comparing a trial of antibiotics with placebo in children with chronic wet cough with normal chest X-rays, normal spirometry and no warning signs |
| <b>Population</b>                    | Children with chronic wet cough with normal chest X-rays, normal spirometry and no warning signs                                                                                       |
| <b>Intervention</b>                  | Antibiotics (amoxicillin, clavulanate, erythromycin or clarithromycin)                                                                                                                 |
| <b>Comparison</b>                    | Placebo                                                                                                                                                                                |
| <b>Outcomes</b>                      | <ul style="list-style-type: none"> <li>Cough frequency (critical)</li> <li>Cough severity VAS (critical)</li> <li>Cough-specific quality-of-life questionnaire (critical)</li> </ul>   |



|                        |                                                                                                                                                                                                                                                                                                                                                                                                                            |
|------------------------|----------------------------------------------------------------------------------------------------------------------------------------------------------------------------------------------------------------------------------------------------------------------------------------------------------------------------------------------------------------------------------------------------------------------------|
|                        | <ul style="list-style-type: none"> <li>• Cough severity symptom score (important)</li> <li>• Generic quality-of-life questionnaire (important)</li> <li>• Incontinence (important)</li> <li>• Impact of cough on self-esteem, sleep, fatigue, depression, social isolation etc. (important)</li> <li>• Treatment specific adverse events (important)</li> <li>• Tussive response to cough challenge (important)</li> </ul> |
| <b>Search strategy</b> | <p>Chronic wet cough or bronchitis populations AND a trial of antibiotics (amoxicillin, clavulanate, erythromycin or clarithromycin)</p> <p>Source: Pubmed/Medline, Embase and Cochrane Controlled Register of Trials (CENTRAL)</p> <p>Study type: Randomised placebo-controlled trial</p> <p>Year: From inception to 2018 June</p> <p>Language: Not restricted</p>                                                        |

### 3. Electronic search strategies

***Question 1: Should chest CT be routinely performed on chronic cough patient with normal chest X-ray and physical examination?***

Last search: June 2018

Pubmed MEDLINE

#1. ("Cough"[Mesh] OR cough[TIAB] OR coughing[TIAB] OR coughs[TIAB] OR "Bronchitis"[Mesh:NoExp] OR "Bronchitis, Chronic"[Mesh] OR bronchitis[TIAB] OR bronchitic[TIAB])

#2. (chronic[TIAB] OR persistent[TIAB] OR longstanding[TIAB] OR long-standing[TIAB] OR longterm[TIAB] OR long-term[TIAB] OR uncontrolled[TIAB] OR "poorly controlled" [TIAB] OR lingering[TIAB] OR nagging[TIAB] OR resistant[TIAB] OR refractory[TIAB] OR unexplained[TIAB] OR idiopathic[TIAB] OR frequent[TIAB])

#3. #1 AND #2

#4. "Tomography, X-Ray Computed"[Mesh] OR ct[TIAB] OR "computed tomography"[TIAB] OR "computed tomogram"[TIAB] OR "computerized tomography"[TIAB] OR "computerised tomography"[TIAB] OR "computed X-ray tomography"[TIAB] OR "computer assisted tomography"[TIAB] OR "computerized axial tomography"[TIAB] OR "computerised axial tomography"[TIAB]

#5. #3 AND #4

#6. #5 NOT (animals[Mesh Term] NOT (humans[Mesh Term] AND animals[Mesh Term]))

Embase

#1. 'coughing'/exp OR cough:ab,ti OR coughing:ab,ti OR coughs:ab,ti OR 'bronchitis'/de OR 'chronic bronchitis'/exp OR 'laryngotracheobronchitis'/exp OR 'tracheobronchitis'/exp OR bronchitis:ab,ti OR bronchitic:ab,ti

#2. chronic:ab,ti OR persistent:ab,ti OR longstanding:ab,ti OR 'long standing':ab,ti OR longterm:ab,ti OR 'long term':ab,ti OR uncontrolled:ab,ti OR 'poorly controlled':ab,ti OR lingering:ab,ti OR nagging:ab,ti OR resistant:ab,ti OR refractory:ab,ti OR unexplained:ab,ti OR idiopathic:ab,ti OR frequent:ab,ti = 3417568

#3. #1 AND #2

#4. 'computer assisted tomography'/exp OR ct:ab,ti OR "computed tomography":ab,ti OR "computed tomogram":ab,ti OR "computerized tomography":ab,ti OR "computerised tomography":ab,ti OR "computed X-ray tomography":ab,ti OR "computer assisted tomography":ab,ti OR "computerized axial tomography":ab,ti OR "computerised axial tomography":ab,ti

#5. #3 AND #4

#6. #5 NOT ('animal experiment'/de OR 'animal model'/de OR 'in vitro study'/de OR 'nonhuman'/de)

Cochrane library

#1. MeSH descriptor: [Cough] explode all trees

#2. cough:ti,ab,kw (Word variations have been searched)

#3. MeSH descriptor: [Bronchitis] this term only

#4. MeSH descriptor: [Bronchitis, Chronic] explode all trees

#5. bronchitis:ti,ab,kw (Word variations have been searched)

#6. #1 OR #2 OR #3 OR #4 OR #5

#7. chronic or persistent or longstanding or long-standing or longterm or long-term or uncontrolled or "poorly controlled" or lingering or nagging or resistant or refractory or unexplained or idiopathic or frequent:ti,ab,kw (Word variations have been searched)

#8. #6 AND #7

#9. MeSH descriptor: [Tomography, X-Ray Computed] explode all trees

#10. ct or "computed tomography" or "computed tomogram" or "computerized tomography" or "computerised tomography" or "computed X-ray tomography" or "computer assisted tomography" or "computerized axial tomography" or "computerised axial tomography":ti,ab,kw (Word variations have been searched)

#11. #9 OR #10

#12. #8 AND #11

#13. #12 in Trials

***Question 2: Should FeNO/blood eosinophils be used to predict treatment response to corticosteroids/anti-leukotrienes in chronic cough?***

Last search: June 2018

Pubmed MEDLINE

#1. (((("Cough"[Mesh]) OR (cough[TIAB] OR coughing[TIAB] OR coughs[TIAB]))) OR ("Bronchitis"[Mesh:NoExp] OR "Bronchitis, Chronic"[Mesh])) OR (bronchitis[TIAB] OR bronchitic[TIAB])

#2. "Adrenal Cortex Hormones"[Mesh:NoExp] OR "Glucocorticoids"[Mesh] OR "Hydroxycorticosteroids"[Mesh:NoExp] OR "Steroids"[Mesh:NoExp] OR "Beclomethasone"[Mesh] OR "Betamethasone"[Mesh] OR "Budesonide"[Mesh] OR "Fluticasone"[Mesh] OR "Mometasone Furoate"[Mesh] OR "Triamcinolone"[Mesh] OR "ciclesonide" [Supplementary Concept] OR "flunisolide" [Supplementary Concept] OR "Prednisolone"[Mesh] OR "Prednisone"[Mesh] OR "Dexamethasone"[Mesh] OR "Cortisone"[Mesh] OR "Hydrocortisone"[Mesh] OR "Leukotriene Antagonists"[Mesh] OR "montelukast" [Supplementary Concept] OR "pranlukast" [Supplementary Concept] OR "zafirlukast" [Supplementary Concept]

#3. (glucocorticoid[TIAB] OR glucocorticoids[TIAB] OR corticosteroid[TIAB] OR corticosteroids[TIAB] OR steroid[TIAB] OR steroids[TIAB]) OR beclomethasone[TIAB] OR betamethasone[TIAB] OR budesonide[TIAB] OR fluticasone[TIAB] OR mometasone[TIAB] OR triamcinolone[TIAB] OR ciclesonide[TIAB] OR

flunisolide[TIAB] OR prednisolone[TIAB] OR prednisone[TIAB] OR methylprednisolone[TIAB] OR dexamethasone[TIAB] OR cortisone[TIAB] OR hydrocortisone[TIAB] OR montelukast[TIAB] OR pranlukast[TIAB] OR zafirlukast[TIAB] OR leukotriene[TIAB] OR leukotrienes[TIAB] OR leukotrien[TIAB] OR leucotriene[TIAB] OR leucotrienes[TIAB] OR leucotrien[TIAB] OR anti-leukotriene[TIAB] OR anti-leukotrienes[TIAB] OR anti-leukotrien[TIAB] OR anti-leucotriene[TIAB] OR anti-leucotrienes[TIAB] OR anti-leucotrien[TIAB]

#4. "Nitric Oxide"[Mesh] OR "Eosinophils"[Mesh] OR "Biomarkers"[Mesh] OR "Sensitivity and Specificity"[Mesh]

#5. "nitric oxide"[TIAB] OR eno[TIAB] OR feno[TIAB] OR eosinophil[TIAB] OR eosinophils[TIAB] OR eosinophilic[TIAB] OR biomarker[TIAB] OR biomarkers[TIAB] OR predict[TIAB] OR predictive[TIAB] OR predictable[TIAB] OR predictability[TIAB] OR predicted[TIAB] OR predicts[TIAB] OR predictor[TIAB] OR predictors[TIAB] OR sensitivity[TIAB] OR sensitive[TIAB] OR sensitivities[TIAB] specificity[TIAB] OR specific[TIAB] OR specificities[TIAB] OR accuracy[TIAB] OR accurate[TIAB] OR accuracies[TIAB] OR “diagnostic value”[TIAB] OR “diagnostic test value”[TIAB] OR “diagnostic utility”[TIAB] OR “diagnostic test utility”[TIAB]

#6. #2 OR #3

#7. #4 OR #5

#8. #1 AND #6 AND #7

#9. #8 NOT ("review"[Publication Type] OR "review literature as topic"[MeSH Terms])

Embase

#1. 'coughing'/exp OR cough:ab,ti OR coughing:ab,ti OR coughs:ab,ti OR 'bronchitis'/de OR 'chronic bronchitis'/exp OR 'laryngotracheobronchitis'/exp OR 'tracheobronchitis'/exp OR bronchitis:ab,ti OR bronchitic:ab,ti

#2. 'corticosteroid'/de OR 'glucocorticoid'/de OR 'hydroxycorticosteroid'/exp OR 'steroid'/de OR 'beclometasone'/exp OR 'betamethasone'/exp OR 'budesonide'/exp OR 'fluticasone'/exp OR 'mometasone furoate'/exp OR 'triamcinolone'/exp OR 'ciclesonide'/exp OR 'flunisolide'/exp OR 'prednisolone'/exp OR 'prednisone'/exp OR 'methylprednisolone'/exp OR 'dexamethasone'/exp OR 'cortisone'/exp OR 'hydrocortisone'/exp OR 'leukotriene receptor blocking agent'/de OR 'montelukast'/exp OR 'pranlukast'/exp OR 'zafirlukast'/exp

#3. corticosteroid:ab,ti OR corticosteroids:ab,ti OR glucocorticoid:ab,ti OR glucocorticoids:ab,ti OR steroid:ab,ti OR steroids:ab,ti OR beclomethasone:ab,ti OR betamethasone:ab,ti OR budesonide:ab,ti OR fluticasone:ab,ti OR mometasone:ab,ti OR triamcinolone:ab,ti OR ciclesonide:ab,ti OR flunisolide:ab,ti OR prednisolone:ab,ti OR prednisone:ab,ti OR methylprednisolone:ab,ti OR dexamethasone:ab,ti OR cortisone:ab,ti OR hydrocortisone:ab,ti

OR montelukast:ab,ti OR pranlukast:ab,ti OR zafirlukast:ab,ti OR leukotriene:ab,ti OR leukotrienes:ab,ti OR leukotrien:ab,ti OR leucotriene:ab,ti OR leucotrienes:ab,ti OR leucotrien:ab,ti OR 'anti leukotriene':ab,ti OR 'anti leukotrienes':ab,ti OR 'anti leukotrien':ab,ti OR 'anti leucotriene':ab,ti OR 'anti leucotrienes':ab,ti OR 'anti leucotrien':ab,ti

#4. 'nitric oxide'/exp OR 'eosinophil'/exp OR 'biological marker'/exp OR 'pharmacological biomarker'/exp OR 'sensitivity and specificity'/exp OR 'predictive value'/exp OR 'diagnostic accuracy'/exp OR 'diagnostic test accuracy study'/exp OR 'diagnostic value'/exp

#5. 'nitric oxide':ab,ti OR eno:ab,ti OR feno:ab,ti OR eosinophil:ab,ti OR eosinophils:ab,ti OR eosinophilic:ab,ti OR biomarker:ab,ti OR biomarkers:ab,ti OR predict:ab,ti OR predictive:ab,ti OR predictable:ab,ti OR predictability:ab,ti OR predicted:ab,ti OR predicts:ab,ti OR predictor:ab,ti OR predictors:ab,ti OR sensitivity:ab,ti OR sensitive:ab,ti OR sensitivities:ab,ti OR specificity:ab,ti OR specific:ab,ti OR specificities:ab,ti OR accuracy:ab,ti OR accurate:ab,ti OR accuracies:ab,ti OR 'diagnostic value':ab,ti OR 'diagnostic test value':ab,ti OR 'diagnostic utility':ab,ti OR 'diagnostic test utility':ab,ti

#6. #2 OR #3

#7. #4 OR #5

#8. #1 AND #6 AND #7

#9. #8 NOT ('conference review'/it OR 'review'/it)

Cochrane Library

#1. MeSH descriptor: [Cough] explode all trees

#2. cough:ti,ab,kw (Word variations have been searched)

#3. MeSH descriptor: [Bronchitis] this term only

#4. MeSH descriptor: [Bronchitis, Chronic] explode all trees

#5. bronchitis:ti,ab,kw (Word variations have been searched)

#6. #1 OR #2 OR #3 OR #4 OR #5

#7. MeSH descriptor: [Adrenal Cortex Hormones] this term only

#8. MeSH descriptor: [Glucocorticoids] explode all trees

#9. MeSH descriptor: [Hydroxycorticosteroids] this term only

#10. MeSH descriptor: [Beclomethasone] explode all trees

#11. MeSH descriptor: [Beclomethasone] explode all trees

- #12. MeSH descriptor: [Betamethasone] explode all trees
- #13. MeSH descriptor: [Budesonide] explode all trees
- #14. MeSH descriptor: [Fluticasone] explode all trees
- #15. MeSH descriptor: [Mometasone Furoate] explode all trees
- #16. MeSH descriptor: [Triamcinolone] explode all trees
- #17. MeSH descriptor: [Prednisolone] explode all trees
- #18. MeSH descriptor: [Prednisone] explode all trees
- #19. MeSH descriptor: [Dexamethasone] explode all trees
- #20. MeSH descriptor: [Cortisone] explode all trees
- #21. MeSH descriptor: [Hydrocortisone] explode all trees
- #22. MeSH descriptor: [Leukotriene Antagonists] explode all trees
- #23. glucocorticoid or glucocorticoids or corticosteroid or corticosteroids or steroid or steroids or beclomethasone or betamethasone or budesonide or fluticasone or mometasone or triamcinolone or ciclesonide or flunisolide or prednisolone or prednisone or methylprednisolone or dexamethasone or cortisone or hydrocortisone or montelukast or pranlukast or zafirlukast or leukotriene or leukotrienes or leukotrien or leucotriene or leucotrienes or leucotrien or anti-leukotriene or anti-leukotrienes or anti-leukotrien or anti-leucotriene or anti-leucotrienes or anti-leucotrien:ti,ab,kw (Word variations have been searched)
- #24. #7 or #8 or #9 or #10 or #11 or #12 or #13 or #14 or #15 or #16 or #17 or #18 or #19 or #20 or #21 or #22 or #23
- #25. MeSH descriptor: [Nitric Oxide] explode all trees
- #26. MeSH descriptor: [Eosinophils] explode all trees
- #27. MeSH descriptor: [Biomarkers] explode all trees
- #28. MeSH descriptor: [Sensitivity and Specificity] explode all trees
- #29. "nitric oxide" or eno or feno or eosinophil or eosinophils or eosinophilic or biomarker or biomarkers or predict or predictive or predictable or predictability or predicted or predicts or predictor or predictors or sensitivity or sensitive or sensitivities specificity or specific or specificities or accuracy or accurate or accuracies or "diagnostic value" or "diagnostic test value" or "diagnostic utility" or "diagnostic test utility":ti,ab,kw (Word variations have been searched)
- #29. #25 or #26 or #27 or #28 or #29
- #30. #6 and #24 and #29
- #31. #30 in Trials

***Question 3: Should anti-asthmatic drugs (anti-inflammatory or bronchodilator drugs) be used to treat patients with chronic cough?***

Last search: June 2018

#### Pubmed MEDLINE

- #1. (((("Cough"[Mesh]) OR (cough[TIAB] OR coughing[TIAB] OR coughs[TIAB])) OR ("Bronchitis"[Mesh:NoExp] OR "Bronchitis, Chronic"[Mesh])) OR (bronchitis[TIAB] OR bronchitic[TIAB]))
- #2. "Beclomethasone"[Mesh] OR "Betamethasone"[Mesh] OR "Budesonide"[Mesh] OR "Fluticasone"[Mesh] OR "Mometasone Furoate"[Mesh] OR "Triamcinolone"[Mesh] OR "ciclesonide" [Supplementary Concept] OR "flunisolide" [Supplementary Concept] OR "Prednisolone"[Mesh] OR "Prednisone"[Mesh] OR "Dexamethasone"[Mesh] OR "Cortisone"[Mesh] OR "Hydrocortisone"[Mesh] OR "Leukotriene Antagonists"[Mesh] OR "montelukast" [Supplementary Concept] OR "pranlukast" [Supplementary Concept] OR "zafirlukast" [Supplementary Concept]
- #3. "Adrenergic beta-2 Receptor Agonists"[Mesh] OR "Formoterol Fumarate"[Mesh] OR "vilanterol"[Supplementary Concept] OR "Salmeterol Xinafoate"[Mesh] OR "indacaterol"[Supplementary Concept] OR "olodaterol"[Supplementary Concept] OR "Albuterol"[Mesh] OR "tulobuterol"[Supplementary Concept] OR "Terbutaline"[Mesh] OR "Cholinergic Antagonists"[Mesh:NoExp] OR "Muscarinic Antagonists"[Mesh] OR "Ipratropium"[Mesh] OR "Glycopyrrolate"[Mesh] OR "Tiotropium Bromide"[Mesh] OR "aclidinium bromide"[Supplementary Concept] OR "GSK573719"[Supplementary Concept]
- #4. beclomethasone[TIAB] OR betamethasone[TIAB] OR budesonide[TIAB] OR fluticasone[TIAB] OR mometasone[TIAB] OR triamcinolone[TIAB] OR ciclesonide[TIAB] OR flunisolide[TIAB] OR prednisolone[TIAB] OR prednisone[TIAB] OR methylprednisolone[TIAB] OR dexamethasone[TIAB] OR cortisone[TIAB] OR hydrocortisone[TIAB] OR montelukast[TIAB] OR pranlukast[TIAB] OR zafirlukast[TIAB]
- #5. formoterol[TIAB] OR vilanterol[TIAB] OR salmeterol[TIAB] OR indacaterol[TIAB] OR olodaterol[TIAB] OR albuterol[TIAB] OR salbutamol[TIAB] OR levalbuterol[TIAB] OR tulobuterol[TIAB] OR terbutaline[TIAB] OR ipratropium[TIAB] OR glycopyrrolate[TIAB] OR tiotropium[TIAB] OR aclidinium[TIAB] OR umeclidinium[TIAB]
- #6. #2-5/OR
- #7. #1 AND #6
- #8. (groups[tiab] OR trial[TIAB] OR randomly[TIAB] OR "drug therapy"[SH] OR placebo[TIAB] OR randomized[TIAB] OR "controlled clinical trial"[PT] OR "randomized controlled trial"[PT]) NOT (animals[MH] NOT (humans[MH] AND animals[MH]))
- #9. #7 AND #8

#### Embase

- #1. 'coughing'/exp OR cough:ab,ti OR coughing:ab,ti OR coughs:ab,ti OR 'bronchitis'/de OR 'chronic bronchitis'/exp OR 'laryngotracheobronchitis'/exp OR 'tracheobronchitis'/exp OR bronchitis:ab,ti OR bronchitic:ab,ti
- #2. 'beclometasone'/exp OR 'betamethasone'/exp OR 'budesonide'/exp OR 'fluticasone'/exp OR 'mometasone furoate'/exp OR 'triamcinolone'/exp OR 'ciclesonide'/exp OR 'flunisolide'/exp OR 'prednisolone'/exp OR 'prednisone'/exp OR 'methylprednisolone'/exp OR 'dexamethasone'/exp OR 'cortisone'/exp OR 'hydrocortisone'/exp OR 'leukotriene receptor blocking agent'/de OR 'montelukast'/exp OR 'pranlukast'/exp OR 'zafirlukast'/exp
- #3. 'beta 2 adrenergic receptor stimulating agent'/exp OR 'formoterol'/exp OR 'vilanterol'/exp OR 'salmeterol'/exp OR 'indacaterol'/exp OR 'olodaterol'/exp OR 'salbutamol'/exp OR 'tulobuterol'/exp OR 'terbutaline'/exp OR

'cholinergic receptor blocking agent'/de OR 'muscarinic receptor blocking agent'/de OR 'ipratropium bromide'/exp OR 'glycopyrronium'/exp OR 'tiotropium bromide'/exp OR 'aclidinium bromide'/exp OR 'umeclidinium'/exp

#4. beclomethasone:ab,ti OR betamethasone:ab,ti OR budesonide:ab,ti OR fluticasone:ab,ti OR mometasone:ab,ti OR triamcinolone:ab,ti OR ciclesonide:ab,ti OR flunisolide:ab,ti OR prednisolone:ab,ti OR prednisone:ab,ti OR methylprednisolone:ab,ti OR dexamethasone:ab,ti OR cortisone:ab,ti OR hydrocortisone:ab,ti OR montelukast:ab,ti OR pranlukast:ab,ti OR zafirlukast:ab,ti

#5. formoterol:ab,ti OR vilanterol:ab,ti OR salmeterol:ab,ti OR indacaterol:ab,ti OR olodaterol:ab,ti OR albuterol:ab,ti OR salbutamol:ab,ti OR levalbuterol:ab,ti OR tulobuterol:ab,ti OR terbutaline:ab,ti OR ipratropium:ab,ti OR glycopyrrolate:ab,ti OR tiotropium:ab,ti OR aclidinium:ab,ti OR umeclidinium:ab,ti

#6. #2 OR #3 OR #4 OR #5

#7. #1 AND #6

#8. 'crossover procedure'/exp OR 'double blind procedure'/exp OR 'randomized controlled trial'/exp OR 'single blind procedure'/exp OR random\* OR factorial\* OR crossover\* OR 'cross over' OR 'cross-over' OR placebo\* OR (doubl\* AND blind\*) OR (singl\* AND blind\*) OR assign\* OR allocat\* OR volunteer\*

#9. #7 AND #8

## Cochrane library

#1. MeSH descriptor: [Cough] explode all trees

#2. cough:ti,ab,kw (Word variations have been searched)

#3. MeSH descriptor: [Bronchitis] this term only

#4. MeSH descriptor: [Bronchitis, Chronic] explode all trees

#5. bronchitis:ti,ab,kw (Word variations have been searched)

#6. #1 OR #2 OR #3 OR #4 OR #5

#7. MeSH descriptor: [Beclomethasone] explode all trees

#8. MeSH descriptor: [Betamethasone] explode all trees

#9. MeSH descriptor: [Budesonide] explode all trees

#10. MeSH descriptor: [Fluticasone] explode all trees

#11. MeSH descriptor: [Mometasone Furoate] explode all trees

#12. MeSH descriptor: [Triamcinolone] explode all trees

#13. MeSH descriptor: [Prednisolone] explode all trees

#14. MeSH descriptor: [Prednisone] explode all trees

#15. MeSH descriptor: [Dexamethasone] explode all trees

#16. MeSH descriptor: [Cortisone] explode all trees



- #17. MeSH descriptor: [Hydrocortisone] explode all trees
- #18. MeSH descriptor: [Leukotriene Antagonists] explode all trees
- #19. beclomethasone or betamethasone or budesonide or fluticasone or mometasone or triamcinolone or ciclesonide or flunisolide or prednisolone or prednisone or methylprednisolone or dexamethasone or cortisone or hydrocortisone or montelukast or pranlukast or zafirlukast:ti,ab,kw (Word variations have been searched)
- #20. MeSH descriptor: [Adrenergic beta-2 Receptor Agonists] explode all trees
- #21. MeSH descriptor: [Formoterol Fumarate] explode all trees
- #22. MeSH descriptor: [Salmeterol Xinafoate] explode all trees
- #23. MeSH descriptor: [Albuterol] explode all trees
- #24. MeSH descriptor: [Terbutaline] explode all trees
- #25. MeSH descriptor: [Cholinergic Antagonists] this term only
- #26. MeSH descriptor: [Muscarinic Antagonists] explode all trees
- #27. MeSH descriptor: [Ipratropium] explode all trees
- #28. MeSH descriptor: [Glycopyrrolate] explode all trees
- #29. MeSH descriptor: [Tiotropium Bromide] explode all trees
- #30. formoterol or vilanterol or salmeterol or indacaterol or olodaterol or albuterol or salbutamol or levalbuterol or tulobuterol or terbutaline or ipratropium or glycopyrrolate or tiotropium or aclidinium or umeclidinium:ti,ab,kw (Word variations have been searched)
- #31. #7-30/OR
- #32. #6 AND #31
- #33. #32 in Trials

***Question 4: Should anti-acid drugs (PPIs and H2 antagonists) be used to treat patients with chronic cough?***

Last search: June 2018

Pubmed MEDLINE

- #1. "Cough"[Mesh]
- #2. cough[TIAB] OR coughing[TIAB] OR coughs[TIAB]
- #3. ("Bronchitis"[Mesh:NoExp]) OR "Bronchitis, Chronic"[Mesh]
- #4. bronchitis[TIAB] OR bronchitic[TIAB]
- #5. #1 OR #2 OR #3 OR #4
- #6. "Proton Pump Inhibitors"[Mesh] OR "Proton Pump Inhibitors" [Pharmacological Action]

#7. "proton pump inhibitor"[TIAB] OR "proton pump inhibitors"[TIAB] OR ppi[TIAB] OR omeprazole[TIAB] OR esomeprazole[TIAB] OR lansoprazole[TIAB] OR dexlansoprazole[TIAB] OR pantoprazole[TIAB] OR rabeprazole[TIAB] OR timoprazole[TIAB]

#8. #6 OR #7

#9. "Histamine H2 Antagonists"[Mesh] OR "Histamine H2 Antagonists"[Pharmacological Action]

#10. "H2 receptor blockaders"[TIAB] OR "H2 receptor blockader"[TIAB] OR "H2 receptor blockade"[TIAB] OR "H2 receptor blockers"[TIAB] OR "H2 receptor blocking"[TIAB] OR "H2 receptor blockers"[TIAB] OR "H2 receptor blocker"[TIAB] OR "H2 receptor antagonists"[TIAB] OR "H2 receptor antagonist"[TIAB] OR "H2 blockaders"[TIAB] OR "H2 blockader"[TIAB] OR "h2 blockade"[TIAB] OR "H2 blocking"[TIAB] OR "H2 blockers"[TIAB] OR "H2 blocker"[TIAB] OR "H2 antagonists"[TIAB] OR "H2 antagonist"[TIAB] OR (H2[TIAB] AND antihistamin\*[TIAB]) OR (H2[TIAB] AND anti-histamin\*[TIAB]) OR h2ra[TIAB] OR cimetidine[TIAB] OR famotidine[TIAB] OR lafutidine[TIAB] OR nizatidine[TIAB] OR ranitidine[TIAB] OR roxatidine[TIAB]

#11. #9 OR #10

#12. #8 OR #11

#13. #5 AND #12

#14. (groups[TIAB] OR trial[TIAB] OR randomly[TIAB] OR "drug therapy"[SH] OR placebo[TIAB] OR randomized[TIAB] OR "controlled clinical trial"[PT] OR "randomized controlled trial"[PT]) NOT (animals[MH] NOT (humans[MH] AND animals[MH]))

#15. #13 AND #14

Embase

#1. 'coughing'/exp

#2. cough:ab,ti OR coughing:ab,ti OR coughs:ab,ti

#3. 'bronchitis'/de OR 'chronic bronchitis'/exp OR 'laryngotracheobronchitis'/exp OR 'tracheobronchitis'/exp

#4. bronchitis:ab,ti OR bronchitic:ab,ti

#5. #1 OR #2 OR #3 OR #4

#6. 'proton pump inhibitor'/exp

#7. 'proton pump inhibitor':ab,ti OR 'proton pump inhibitors':ab,ti OR ppi:ab,ti OR omeprazole:ab,ti OR esomeprazole:ab,ti OR lansoprazole:ab,ti OR dexlansoprazole:ab,ti OR pantoprazole:ab,ti OR rabeprazole:ab,ti OR timoprazole:ab,ti

#8. 'histamine h2 receptor antagonist'/exp

#9. 'h2 receptor blockaders':ab,ti OR 'h2 receptor blockader':ab,ti OR 'h2 receptor blockade':ab,ti OR 'h2 receptor blocking':ab,ti OR 'h2 receptor blockers':ab,ti OR 'h2 receptor blocker':ab,ti OR 'h2 receptor antagonists':ab,ti OR 'h2 receptor antagonist':ab,ti OR 'h2 blockaders':ab,ti OR 'h2 blockader':ab,ti OR 'h2 blockade':ab,ti OR 'h2 blocking':ab,ti OR 'h2 blockers':ab,ti OR 'h2 blocker':ab,ti OR 'h2 antagonists':ab,ti OR 'h2 antagonist':ab,ti OR (h2:ab,ti AND antihistamin\*:ab,ti) OR (h2:ab,ti AND 'anti histamin\*':ab,ti) OR h2ra:ab,ti OR cimetidine:ab,ti OR famotidine:ab,ti OR lafutidine:ab,ti OR nizatidine:ab,ti OR ranitidine:ab,ti OR roxatidine:ab,ti

#10. #6 OR #7

#11. #8 OR #9

#12. #10 OR #11

#13. #5 AND #12

#14. 'crossover procedure'/exp OR 'double blind procedure'/exp OR 'randomized controlled trial'/exp OR 'single blind procedure'/exp OR random\* OR factorial\* OR crossover\* OR 'cross over' OR 'cross-over' OR placebo\* OR (doubl\* AND blind\*) OR (singl\* AND blind\*) OR assign\* OR allocat\* OR volunteer\*

#15. #13 AND #14

Cochrane library

#1. MeSH descriptor: [Cough] explode all trees

#2. cough:ti,ab,kw (Word variations have been searched)

#3. MeSH descriptor: [Bronchitis] this term only

#4. MeSH descriptor: [Bronchitis, Chronic] explode all trees

#5. bronchitis:ti,ab,kw (Word variations have been searched)

#6. #1 OR #2 OR #3 OR #4 OR #5

#7. MeSH descriptor: [Proton Pump Inhibitors] explode all trees

#8. 'proton pump inhibitor' or 'proton pump inhibitors' or ppi or omeprazole or esomeprazole or lansoprazole or dexlansoprazole or pantoprazole or rabeprazole or timoprazole:ti,ab,kw (Word variations have been searched)

#9. MeSH descriptor: [Histamine H2 Antagonists] explode all trees

#10. "H2 receptor blockaders" or "H2 receptor blockader" or "H2 receptor blockade" or "H2 receptor blockers" or "H2 receptor blocking" or "H2 receptor blockers" or "H2 receptor blocker" or "H2 receptor antagonists" or "H2 receptor antagonist" or "H2 blockaders" or "H2 blockader" or "h2 blockade" or "H2 blocking" or "H2 blockers" or "H2 blocker" or "H2 antagonists" or "H2 antagonist" or (H2 and antihistamin\*) or (H2 and anti-histamin\*) or h2ra or cimetidine or famotidine or lafutidine or nizatidine or ranitidine or roxatidine:ti,ab,kw (Word variations have been searched)

#11. #7 OR #8

#12. #9 OR #10

#13. #11 OR #12

#14. #13 in Trials

***Question 5: Should drugs with pro-motility activity (reflux inhibitors, prokinetics and macrolides with pro-motility activity) be used to treat patients with chronic cough?***

Last search: June 2018

## Pubmed MEDLINE

- #1. (((("Cough"[Mesh]) OR (cough[TIAB] OR coughing[TIAB] OR coughs[TIAB])) OR  
(("Bronchitis"[Mesh:NoExp]) OR "Bronchitis, Chronic"[Mesh])) OR (bronchitis[TIAB] OR bronchitic[TIAB]))
- #2. "Metoclopramide"[Mesh] OR Metoclopramide[TIAB] OR Metaclopramide[TIAB] OR Metoclopromide[TIAB]  
OR Maxolon[TIAB] OR Primperan[TIAB] OR Reglan[TIAB] OR Cerucal[TIAB]
- #3. "Domperidone"[Mesh] OR Domperidone[TIAB] OR Domperidon[TIAB] OR Motilium[TIAB]
- #4. "Baclofen"[Mesh] OR Baclofen[TIAB] OR Baclophen[TIAB]
- #5. "Macrolides"[Mesh:NoExp] OR Macrolides[TIAB] OR Macrolide[TIAB] OR "Erythromycin"[Mesh] OR  
Erythromycin[TIAB] OR Monomycin[TIAB] OR Mitemcinal[TIAB] OR Azithromycin[TIAB] OR  
Azythromycin[TIAB] OR Zithromax[TIAB] OR Sumamed[TIAB] OR Clarithromycin[TIAB] OR Biaxin[TIAB]  
OR Ketolides[TIAB] OR Roxithromycin[TIAB] OR Rulide[TIAB] OR Rulid[TIAB] OR "Troleandomycin"[Mesh]  
OR Troleandomycin[TIAB] OR Triacetyloleandomycin[TIAB] OR Telithromycin[TIAB] OR Ketek[TIAB]
- #6. #2 OR #3 OR #4 OR #5
- #7. #1 AND #6
- #8. (groups[tiab] OR trial[TIAB] OR randomly[TIAB] OR "drug therapy"[SH] OR placebo[TIAB] OR  
randomized[TIAB] OR "controlled clinical trial"[PT] OR "randomized controlled trial"[PT]) NOT (animals[MH]  
NOT (humans[MH] AND animals[MH]))
- #9. #7 AND #8

## Embase

- #1. 'coughing'/exp OR cough:ab,ti OR coughing:ab,ti OR coughs:ab,ti OR 'bronchitis'/de OR 'chronic bronchitis'/exp  
OR 'laryngotracheobronchitis'/exp OR 'tracheobronchitis'/exp OR bronchitis:ab,ti OR bronchitic:ab,ti
- #2. 'metoclopramide'/exp OR metoclopramide:ab,ti OR metaclopramide:ab,ti OR metoclopromide:ab,ti OR  
maxolon:ab,ti OR primperan:ab,ti OR reglan:ab,ti OR cerucal:ab,ti
- #3. 'domperidone'/exp OR domperidone:ab,ti OR domperidon:ab,ti OR motilium:ab,ti
- #4. 'macrolide'/de OR 'erythromycin'/exp OR 'mitemcinal'/exp OR 'erythromycin derivative'/exp OR  
'azithromycin'/exp OR 'clarithromycin'/exp OR 'telithromycin'/exp OR 'roxithromycin'/exp OR 'troleandomycin'/exp  
OR macrolides:ab,ti OR macrolide:ab,ti OR erythromycin:ab,ti OR monomycin:ab,ti OR mitemcinal:ab,ti OR  
azithromycin:ab,ti OR azythromycin:ab,ti OR zithromax:ab,ti OR sumamed:ab,ti OR clarithromycin:ab,ti OR  
biaxin:ab,ti OR ketolides:ab,ti OR roxithromycin:ab,ti OR rulide:ab,ti OR rulid:ab,ti OR troleandomycin:ab,ti OR  
triacetyloleandomycin:ab,ti OR telithromycin:ab,ti OR ketek:ab,ti
- #5. #2 OR #3 OR #4
- #6. #1 AND #5
- #7. 'crossover procedure'/exp OR 'double blind procedure'/exp OR 'randomized controlled trial'/exp OR 'single blind  
procedure'/exp OR random\* OR factorial\* OR crossover\* OR 'cross over' OR 'cross-over' OR placebo\* OR (doubl\*  
AND blind\*) OR (singl\* AND blind\*) OR assign\* OR allocat\* OR volunteer\*

#8. #6 AND #7

Cochrane library

#1. MeSH descriptor: [Cough] explode all trees

#2. cough:ti,ab,kw (Word variations have been searched)

#3. MeSH descriptor: [Bronchitis] this term only

#4. MeSH descriptor: [Bronchitis, Chronic] explode all trees

#5. bronchitis:ti,ab,kw (Word variations have been searched)

#6. #1 OR #2 OR #3 OR #4 OR #5

#7. MeSH descriptor: [Metoclopramide] explode all trees

#8. Metoclopramide or Metaclopramide or Metoclopramide or Maxolon or Primperan or Reglan or Cerucal:ti,ab,kw (Word variations have been searched)

#9. MeSH descriptor: [Domperidone] explode all trees

#10. Domperidone or Domperidon or Motilium:ti,ab,kw (Word variations have been searched)

#11. MeSH descriptor: [Baclofen] explode all trees

#12. Baclofen or Baclophen:ti,ab,kw (Word variations have been searched)

#13. MeSH descriptor: [Macrolides] this term only

#14. MeSH descriptor: [Erythromycin] explode all trees

#15. MeSH descriptor: [Troleandomycin] explode all trees

#16. Macrolides or Macrolide or Erythromycin or Monomycin or Mitemcinal or Azithromycin or Azythromycin or Zithromax or Sumamed or Clarithromycin or Biaxin or Ketolides or Roxithromycin or Rulide or Rulid or Troleandomycin or Triacetyloleandomycin or Telithromycin or Ketek:ti,ab,kw (Word variations have been searched)

#17. #7 or #8 or #9 or #10 or #11 or #12 or #13 or #14 or #15 or #16

#18. #6 and #17

#19. #18 in Trials

***Question 6: Which cough neuromodulatory agents (pregabalin, gabapentin, tricyclics, and opiates) should be used to treat patients with chronic cough?***

Last search: June 2018

## Pubmed MEDLINE

- #1. (((("Cough"[Mesh]) OR (cough[TIAB] OR coughing[TIAB] OR coughs[TIAB])) OR  
(("Bronchitis"[Mesh:NoExp]) OR "Bronchitis, Chronic"[Mesh])) OR (bronchitis[TIAB] OR bronchitic[TIAB]))
- #2. "Pregabalin"[Mesh] OR Pregabalin[TIAB] OR Lyrica[TIAB]
- #3. "gabapentin" [Supplementary Concept] OR Gabapentin[TIAB] OR Neurontin[TIAB]
- #4. "Antidepressive Agents, Tricyclic"[Mesh] OR (tricyclic[TIAB] AND (antidepressant[TIAB] OR  
antidepressants[TIAB] OR antidepressive[TIAB])) OR "Amitriptyline"[Mesh] OR Amitriptyline[TIAB] OR  
Amitriptylin[TIAB] OR Amitriptiline[TIAB] OR Amitriptilin[TIAB] OR Elavil[TIAB] OR "Clomipramine"[Mesh]  
OR Clomipramine[TIAB] OR Chlomipramine[TIAB] OR Chlorimipramine[TIAB] OR Anafranil[TIAB] OR  
Cyclobenzaprine[TIAB] OR Flexeril[TIAB] OR "Desipramine"[Mesh] OR Desipramine[TIAB] OR  
Desmethyylimipramine[TIAB] OR Demethyylimipramine[TIAB] OR Norpramin[TIAB] OR Pertofrane[TIAB] OR  
Desmethyldoxepin[TIAB] OR Dibenzeprin[TIAB] OR Noveril[TIAB] OR "Dothiepin"[Mesh] OR Dothiepin[TIAB]  
OR Dosulepin[TIAB] OR Prothiaden[TIAB] OR "Doxepin"[Mesh] OR Doxepin[TIAB] OR Sinequan[TIAB] OR  
"Imipramine"[Mesh] OR Imipramine[TIAB] OR Melipramine[TIAB] OR Tofranil[TIAB] OR "Iprindole"[Mesh]  
OR Iprindole[TIAB] OR "Lofepramine"[Mesh] OR Lofepramine[TIAB] OR Melitracene[TIAB] OR  
Metapramine[TIAB] OR Mirtazapine[TIAB] OR Remeron[TIAB] OR "Nortriptyline"[Mesh] OR  
Nortriptyline[TIAB] OR Nortriptylin[TIAB] OR Nortriptiline[TIAB] OR Nortriptilin[TIAB] OR Aventyl[TIAB]  
OR Sensival[TIAB] OR Noxiptilin[TIAB] OR "Opipramol"[Mesh] OR Opipramol[TIAB] OR insidon[TIAB] OR  
"Protriptyline"[Mesh] OR Protriptyline[TIAB] OR Tianeptine[TIAB] OR "Trimipramine"[Mesh] OR  
Trimipramine[TIAB] OR Surmontil[TIAB]
- #5. "Analgesics, Opioid"[Mesh] OR "Opium"[Mesh] OR "Opiate Alkaloids"[Mesh:NoExp] OR opioid[TIAB] OR  
opioids[TIAB] OR opium[TIAB] OR opiate[TIAB] OR opiates[TIAB] OR "Morphine"[Mesh] OR  
Morphine[TIAB] OR morphia[TIAB] OR "Codeine"[Mesh] OR codeine[TIAB] OR "pholcodine" [Supplementary  
Concept] OR pholcodine[TIAB]
- #6. #2 OR #3 OR #4 OR #5
- #7. #1 AND #6
- #8. (groups[tiab] OR trial[TIAB] OR randomly[TIAB] OR "drug therapy"[SH] OR placebo[TIAB] OR  
randomized[TIAB] OR "controlled clinical trial"[PT] OR "randomized controlled trial"[PT]) NOT (animals[MH]  
NOT (humans[MH] AND animals[MH]))
- #9. #7 AND #8

## Embase

- #1. 'coughing'/exp OR cough:ab,ti OR coughing:ab,ti OR coughs:ab,ti OR 'bronchitis'/de OR 'chronic bronchitis'/exp  
OR 'laryngotracheobronchitis'/exp OR 'tracheobronchitis'/exp OR bronchitis:ab,ti OR bronchitic:ab,ti
- #2. 'pregabalin'/exp OR pregabalin:ab,ti OR lyrica:ab,ti
- #3. 'gabapentin'/exp OR gabapentin:ab,ti OR neurontin:ab,ti
- #4. 'tricyclic antidepressant agent'/exp OR (tricyclic:ab,ti AND (antidepressant:ab,ti OR antidepressants:ab,ti OR  
antidepressive:ab,ti)) OR amitriptyline:ab,ti OR amitriptylin:ab,ti OR amitriptiline:ab,ti OR amitriptilin:ab,ti OR  
elavil:ab,ti OR clomipramine:ab,ti OR chlomipramine:ab,ti OR chlorimipramine:ab,ti OR anafranil:ab,ti OR  
cyclobenzaprine:ab,ti OR flexeril:ab,ti OR desipramine:ab,ti OR desmethyylimipramine:ab,ti OR  
demethyylimipramine:ab,ti OR norpramin:ab,ti OR pertofrane:ab,ti OR desmethyldoxepin:ab,ti OR dibenzepin:ab,ti

OR noveril:ab,ti OR dothiepin:ab,ti OR dosulepin:ab,ti OR prothiaden:ab,ti OR doxepin:ab,ti OR sinequan:ab,ti OR imipramine:ab,ti OR melipramine:ab,ti OR tofranil:ab,ti OR iprindole:ab,ti OR lofepramine:ab,ti OR melitracene:ab,ti OR metapramine:ab,ti OR mirtazapine:ab,ti OR remeron:ab,ti OR nortriptyline:ab,ti OR nortriptylin:ab,ti OR nortriptiline:ab,ti OR nortriptilin:ab,ti OR aventyl:ab,ti OR sensival:ab,ti OR noxiptilin:ab,ti OR opipramol:ab,ti OR insidon:ab,ti OR protriptyline:ab,ti OR tianeptine:ab,ti OR trimipramine:ab,ti OR surmontil:ab,ti

#5. 'opiate'/exp OR 'opiate agonist'/de OR 'codeine'/exp OR 'morphine'/exp OR 'pholcodine'/exp OR opioid:ab,ti OR opioids:ab,ti OR opium:ab,ti OR opiate:ab,ti OR opiates:ab,ti OR morphine:ab,ti OR morphia:ab,ti OR codeine:ab,ti OR pholcodine:ab,ti

#6. #2 or #3 or #4 or #5

#7. #1 AND #6

#8. 'crossover procedure'/exp OR 'double blind procedure'/exp OR 'randomized controlled trial'/exp OR 'single blind procedure'/exp OR random\* OR factorial\* OR crossover\* OR 'cross over' OR 'cross-over' OR placebo\* OR (doubl\* AND blind\*) OR (singl\* AND blind\*) OR assign\* OR allocat\* OR volunteer\*

#9. #7 AND #8

Cochrane library

#1. MeSH descriptor: [Cough] explode all trees

#2. cough:ti,ab,kw (Word variations have been searched)

#3. MeSH descriptor: [Bronchitis] this term only

#4. MeSH descriptor: [Bronchitis, Chronic] explode all trees

#5. bronchitis:ti,ab,kw (Word variations have been searched)

#6. #1 OR #2 OR #3 OR #4 OR #5

#7. MeSH descriptor: [Pregabalin] explode all trees

#8. MeSH descriptor: [Antidepressive Agents, Tricyclic] explode all trees

#9. MeSH descriptor: [Amitriptyline] explode all trees

#10. MeSH descriptor: [Clomipramine] explode all trees

#11. MeSH descriptor: [Desipramine] explode all trees

#12. MeSH descriptor: [Dothiepin] explode all trees

#13. MeSH descriptor: [Doxepin] explode all trees

#14. MeSH descriptor: [Imipramine] explode all trees

#15. MeSH descriptor: [Iprindole] explode all trees

#16. MeSH descriptor: [Lofepramine] explode all trees

#17. MeSH descriptor: [Nortriptyline] explode all trees

#18. MeSH descriptor: [Opipramol] explode all trees

- #19. MeSH descriptor: [Protriptyline] explode all trees
- #20. MeSH descriptor: [Trimipramine] explode all trees
- #21. MeSH descriptor: [Analgesics, Opioid] explode all trees
- #22. MeSH descriptor: [Opium] explode all trees
- #23. MeSH descriptor: [Opiate Alkaloids] this term only
- #24. MeSH descriptor: [Morphine] explode all trees
- #25. MeSH descriptor: [Codeine] explode all trees
- #26. pregabalin or lyrica:ti,ab,kw (Word variations have been searched)
- #27. gabapentin or neurontin:ti,ab,kw (Word variations have been searched)
- #28. (tricyclic and (antidepressant or antidepressants or antidepressive)) or Amitriptyline or Amitriptylin or Amitriptiline or Amitriptilin or Elavil or Clomipramine or Chlomipramine or Chlorimipramine or Anafranil or Cyclobenzaprine or Flexeril or Desipramine or Desmethylimipramine or Demethylimipramine or Norpramin or Pertofrane or Desmethyldoxepin or Dibenzeplin or Noveril or Dothiepin or Dosulepin or Prothiaden or Doxepin or Sinequan or Imipramine or Melipramine or Tofranil or Iprindole or Lofepramine or Melitracene or Metapramine or Mirtazapine or Remeron or Nortriptyline or Nortriptylin or Nortriptiline or Nortriptilin or Aventyl or Sensival or Noxiptilin or Opipramol or insidon or Protriptyline or Tianeptine or Trimipramine or Surmontil:ti,ab,kw (Word variations have been searched)
- #29. opioid or opioids or opium or opiate or opiates or Morphine or morphia or codeine or pholcodine:ti,ab,kw (Word variations have been searched)
- #30. #7 or #8 or #9 or #10 or #11 or #12 or #13 or #14 or #15 or #16 or #17 or #18 or #19 or #20 or #21 or #22 or #23 or #24 or #25 or #26 or #27 or #28 or #29
- #32. #6 and #30
- #33. #32 in Trials

***Question 7: Should non-pharmacological therapy (cough control therapy) be used to treat patients with chronic cough?***

Last search: June 2018

Pubmed MEDLINE

- #1. (((("Cough"[Mesh]) OR (cough[TIAB] OR coughing[TIAB] OR coughs[TIAB])) OR ("Bronchitis"[Mesh:NoExp] OR "Bronchitis, Chronic"[Mesh])) OR (bronchitis[TIAB] OR bronchitic[TIAB]))
- #2. "Rehabilitation of Speech and Language Disorders"[Mesh] OR "Speech-Language Pathology"[Mesh] OR "Physical Therapy Modalities"[Mesh] OR ("speech pathology"[TIAB] OR "speech therapy"[TIAB] OR "speech therapist"[TIAB] OR "speech pathologist"[TIAB] OR "speech rehabilitation"[TIAB] OR "speech disorder"[TIAB] OR "language pathology"[TIAB] OR "language therapy"[TIAB] OR "language therapist"[TIAB] OR "language pathologist"[TIAB] OR "language rehabilitation"[TIAB] OR physiotherapy[TIAB] OR physiotherapist[TIAB] OR "physical therapy"[TIAB] OR "physical therapist"[TIAB] OR neurophysiotherapy[TIAB] OR neurophysiotherapist[TIAB])



#3. #1 AND #2

#4. (groups[tiab] OR trial[TIAB] OR randomly[TIAB] OR "drug therapy"[SH] OR placebo[TIAB] OR randomized[TIAB] OR "controlled clinical trial"[PT] OR "randomized controlled trial"[PT]) NOT (animals[MH] NOT (humans[MH] AND animals[MH]))

#5. #3 AND #4

#### Embase

#1. 'coughing'/exp OR cough:ab,ti OR coughing:ab,ti OR coughs:ab,ti OR 'bronchitis'/de OR 'chronic bronchitis'/exp OR 'laryngotracheobronchitis'/exp OR 'tracheobronchitis'/exp OR bronchitis:ab,ti OR bronchitic:ab,ti

#2. 'speech and language rehabilitation'/exp OR 'speech language pathologist'/exp OR 'speech disorder'/exp OR 'physiotherapy'/exp OR 'speech pathology':ab,ti OR 'speech therapy':ab,ti OR 'speech therapist':ab,ti OR 'speech pathologist':ab,ti OR 'speech rehabilitation':ab,ti OR 'speech disorder':ab,ti OR 'language pathology':ab,ti OR 'language therapy':ab,ti OR 'language therapist':ab,ti OR 'language pathologist':ab,ti OR 'language rehabilitation':ab,ti OR physiotherapy:ab,ti OR physiotherapist:ab,ti OR 'physical therapy':ab,ti OR 'physical therapist':ab,ti OR neurophysiotherapy:ab,ti OR neurophysiotherapist:ab,ti

#3. #1 AND #2

#4. 'crossover procedure'/exp OR 'double blind procedure'/exp OR 'randomized controlled trial'/exp OR 'single blind procedure'/exp OR random\* OR factorial\* OR crossover\* OR 'cross over' OR 'cross-over' OR placebo\* OR (doubl\* AND blind\*) OR (singl\* AND blind\*) OR assign\* OR allocat\* OR volunteer\*

#5. #3 AND #4

#### Cochrane library

#1. MeSH descriptor: [Cough] explode all trees

#2. cough:ti,ab,kw (Word variations have been searched)

#3. MeSH descriptor: [Bronchitis] this term only

#4. MeSH descriptor: [Bronchitis, Chronic] explode all trees

#5. bronchitis:ti,ab,kw (Word variations have been searched)

#6. #1 OR #2 OR #3 OR #4 OR #5

#7. MeSH descriptor: [Rehabilitation of Speech and Language Disorders] explode all trees

#8. MeSH descriptor: [Speech-Language Pathology] explode all trees

#9. MeSH descriptor: [Physical Therapy Modalities] explode all trees

#10. "speech pathology" or "speech therapy" or "speech therapist" or "speech pathologist" or "speech rehabilitation" or "speech disorder" or "language pathology" or "language therapy" or "language therapist" or "language pathologist" or "language rehabilitation" or physiotherapy or physiotherapist or "physical therapy" or "physical therapist" or neurophysiotherapy or neurophysiotherapist:ti,ab,kw (Word variations have been searched)

#11. #7 OR #8 OR #9 OR #10

#12. #6 AND #11

#13. #12 in Trials

***Question 8: Should a trial of antibiotics be used in children with chronic wet cough with normal chest x ray, normal spirometry and no warning signs?***

Last search: June 2018

Pubmed MEDLINE

#1. (((("Cough"[Mesh]) OR (cough[TIAB] OR coughing[TIAB] OR coughs[TIAB])) OR ("Bronchitis"[Mesh:NoExp]) OR "Bronchitis, Chronic"[Mesh])) OR (bronchitis[TIAB] OR bronchitic[TIAB])

#2. "Amoxicillin"[Mesh] OR "Clavulanic Acids"[Mesh] OR "Erythromycin"[Mesh:NoExp] OR "Clarithromycin"[Mesh]

#3. amoxicillin[TIAB] OR amoxycillin[TIAB] OR clavulanate[TIAB] OR "clavulanic acids"[TIAB] OR "clavulanic acid"[TIAB] OR augmentin[TIAB] OR co-amoxiclav[TIAB] OR coamoxiclav[TIAB] OR erythromycin[TIAB] OR clarithromycin[TIAB]

#4. #2 OR #3

#5. #1 AND #4

#6. (groups[tiab] OR trial[TIAB] OR randomly[TIAB] OR "drug therapy"[SH] OR placebo[TIAB] OR randomized[TIAB] OR "controlled clinical trial"[PT] OR "randomized controlled trial"[PT]) NOT (animals[MH] NOT (humans[MH] AND animals[MH]))

#7. #5 AND #6

Embase

#1. 'coughing'/exp OR cough:ab,ti OR coughing:ab,ti OR coughs:ab,ti OR 'bronchitis'/de OR 'chronic bronchitis'/exp OR 'laryngotracheobronchitis'/exp OR 'tracheobronchitis'/exp OR bronchitis:ab,ti OR bronchitic:ab,ti

#2. 'amoxicillin'/exp OR 'clavulanic acid'/exp OR 'amoxicillin plus clavulanic acid'/exp OR 'erythromycin'/exp OR 'clarithromycin'/exp

#3. amoxicillin:ab,ti OR amoxycillin:ab,ti OR clavulanate:ab,ti OR 'clavulanic acids':ab,ti OR 'clavulanic acid':ab,ti OR augmentin:ab,ti OR 'co amoxiclav':ab,ti OR coamoxiclav:ab,ti OR erythromycin:ab,ti OR clarithromycin:ab,ti

#4. #2 OR #3

#5. #1 AND #4

#6. 'crossover procedure'/exp OR 'double blind procedure'/exp OR 'randomized controlled trial'/exp OR 'single blind procedure'/exp OR random\* OR factorial\* OR crossover\* OR 'cross over' OR 'cross-over' OR placebo\* OR (doubl\* AND blind\*) OR (singl\* AND blind\*) OR assign\* OR allocat\* OR volunteer\*

#7. #5 AND #6

Cochrane library

#1. MeSH descriptor: [Cough] explode all trees

#2. cough:ti,ab,kw (Word variations have been searched)

#3. MeSH descriptor: [Bronchitis] this term only

#4. MeSH descriptor: [Bronchitis, Chronic] explode all trees

#5. bronchitis:ti,ab,kw (Word variations have been searched)

#6. #1 OR #2 OR #3 OR #4 OR #5

#7. MeSH descriptor: [Amoxicillin] explode all trees

#8. MeSH descriptor: [Clavulanic Acids] explode all trees

#15. MeSH descriptor: [Erythromycin] this term only

#16. MeSH descriptor: [Clarithromycin] explode all trees

#22. amoxicillin or amoxycillin or clavulanate or "clavulanic acids" or "clavulanic acid" or augmentin or co-amoxiclav or coamoxiclav or erythromycin or clarithromycin:ti,ab,kw (Word variations have been searched)

#23. #7 or #8 or #9 or #10 or #11 or #12 or #13 or #14 or #15 or #16 or #17 or #18 or #19 or #20 or #21 or #22

#24. #6 AND #23

#25. #24 in Trials

#### 4. PRISMA flow diagrams

*Question 1: Should chest CT be routinely performed on chronic cough patient with normal chest X-ray and physical examination?*

Last search: June 2018

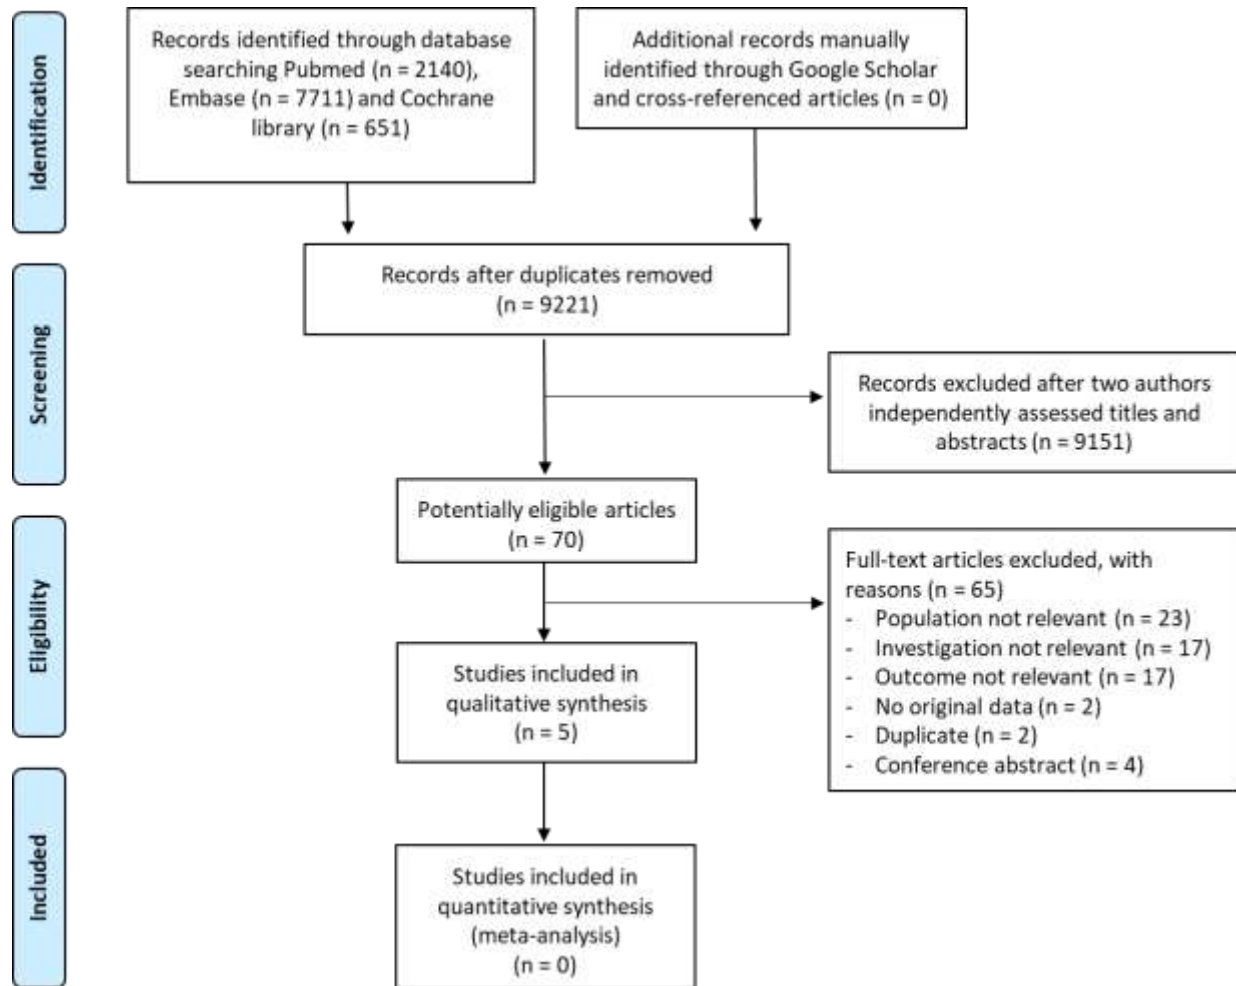

**Question 2: Should FeNO/blood eosinophils be used to predict treatment response to corticosteroids/anti-leukotrienes in chronic cough?**

Last search: June 2018

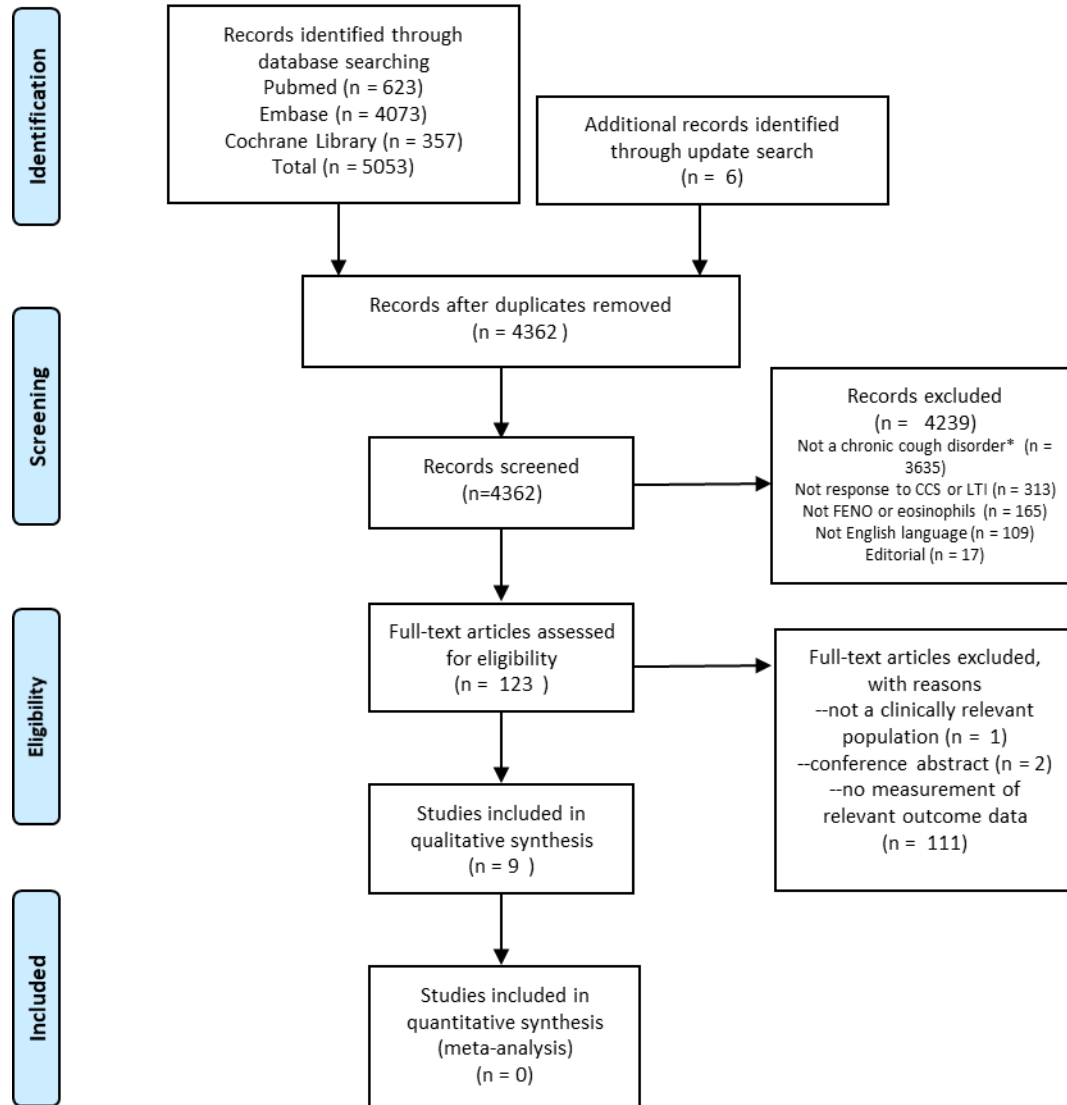

\* Included conditions: chronic cough, cough variant asthma, eosinophilic bronchitis, chronic bronchitis, atopic cough, psychogenic cough, cough hypersensitivity syndrome. Asthma and COPD were included if: cough was mentioned as a key feature AND diagnostic criteria/terminology were non-specific AND interventions/outcomes were relevant.

**Question 3: Should anti-asthmatic drugs (anti-inflammatory or bronchodilator drugs) be used to treat patients with chronic cough?**

Last search: June 2018

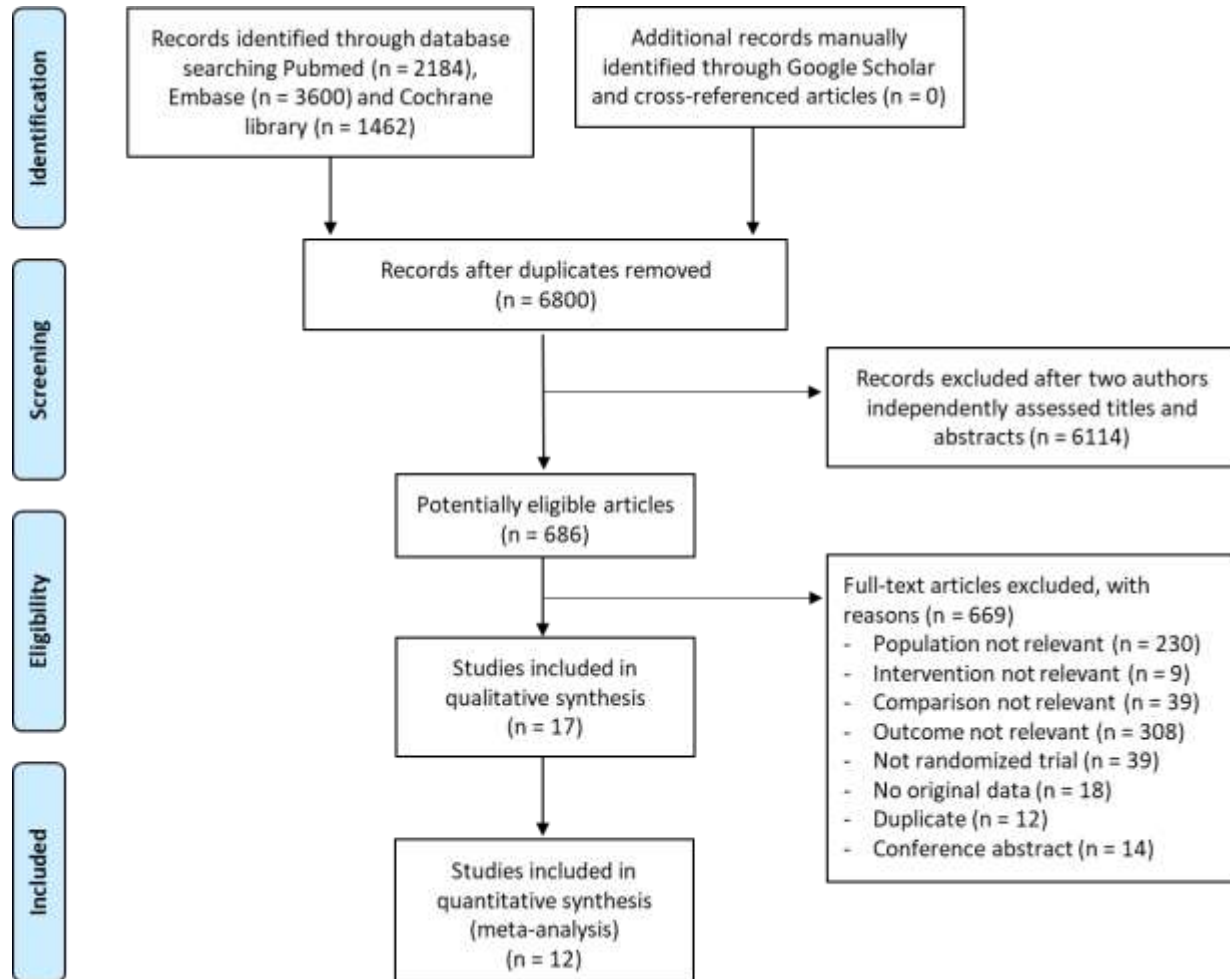

**Question 4: Should anti-acid drugs (PPIs and H2 antagonists) be used to treat patients with chronic cough?**

Last search: June 2018

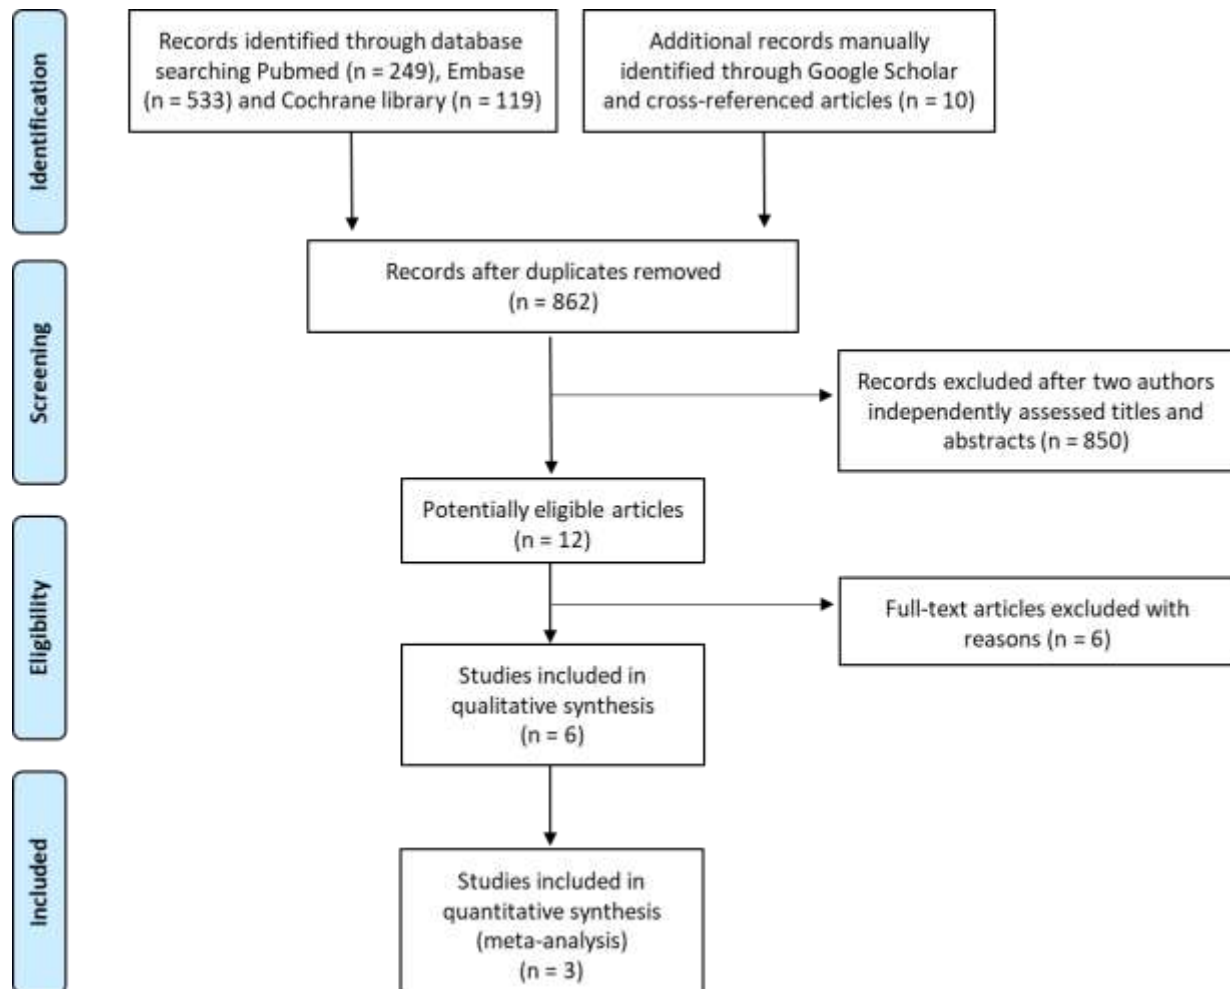

**Question 5: Should drugs with pro-motility activity (reflux inhibitors, prokinetics and macrolides with pro-motility activity) be used to treat patients with chronic cough?**

Last search: June 2018

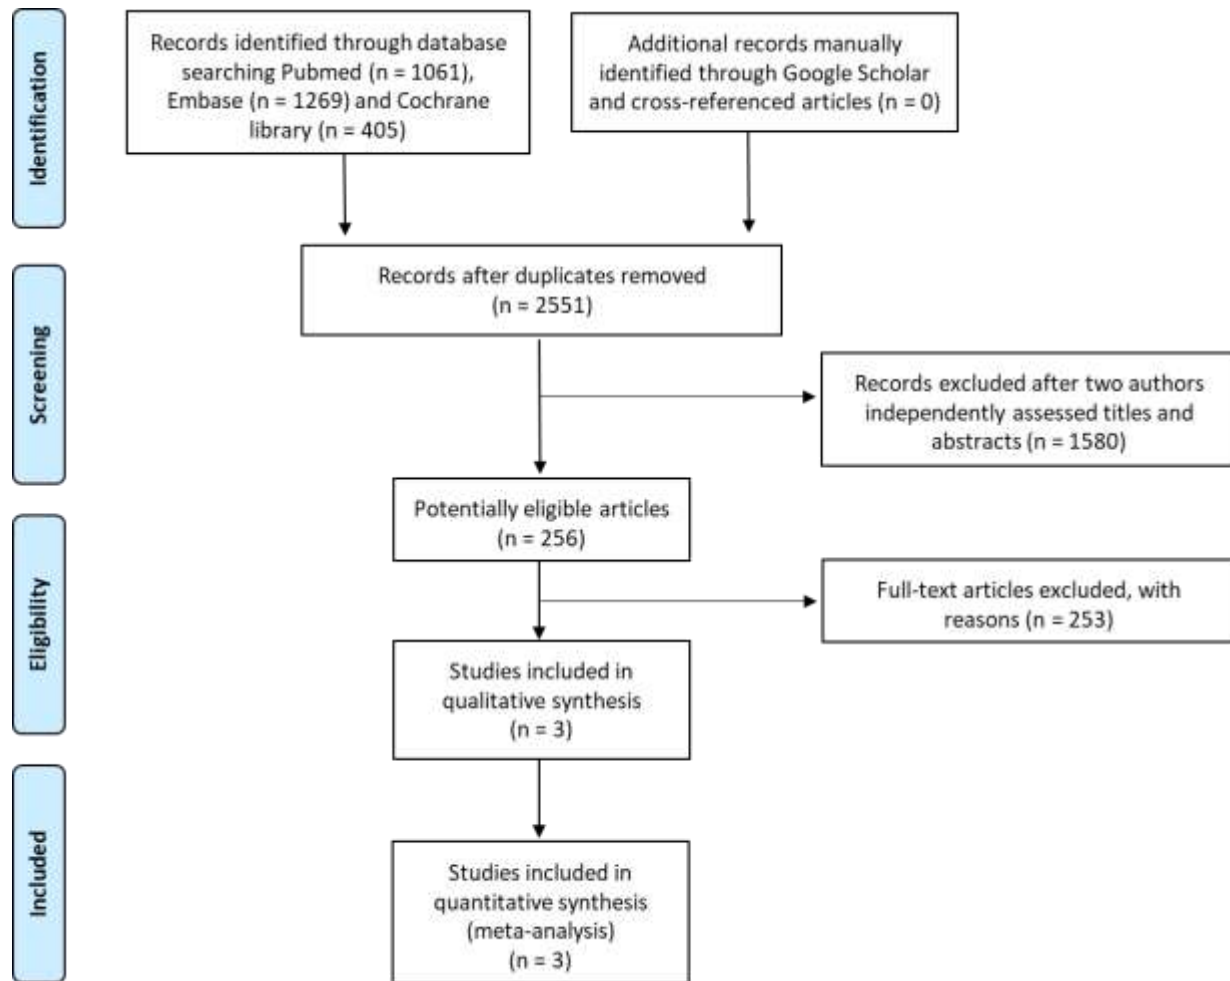



**Question 6: Which cough neuromodulatory agents (pregabalin, gabapentin, tricyclics, and opiates) should be used to treat patients with chronic cough?**

Last search: June 2018

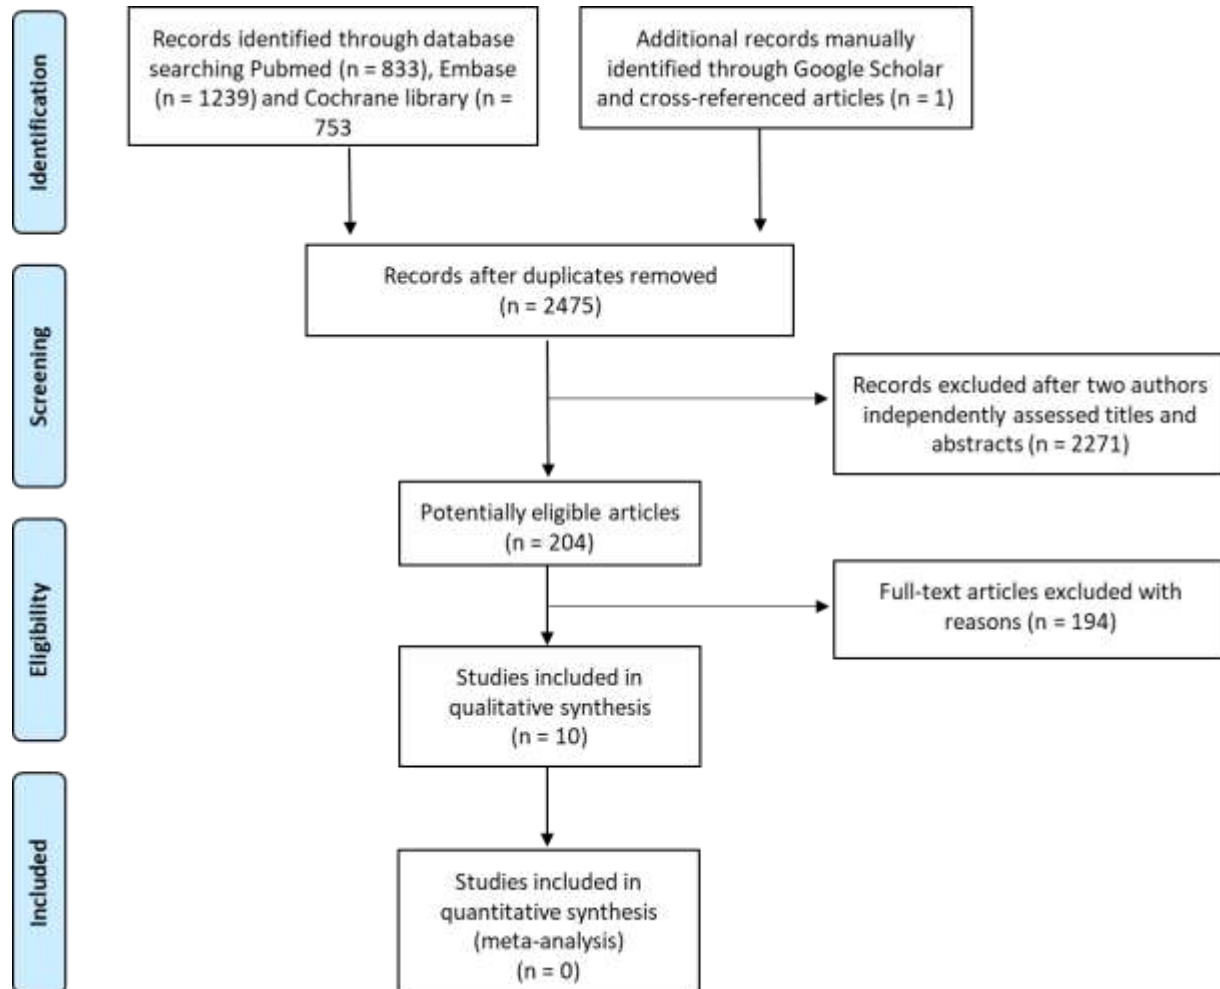

**Question 7: Should non-pharmacological therapy (cough control therapy) be used to treat patients with chronic cough?**

Last search: June 2018

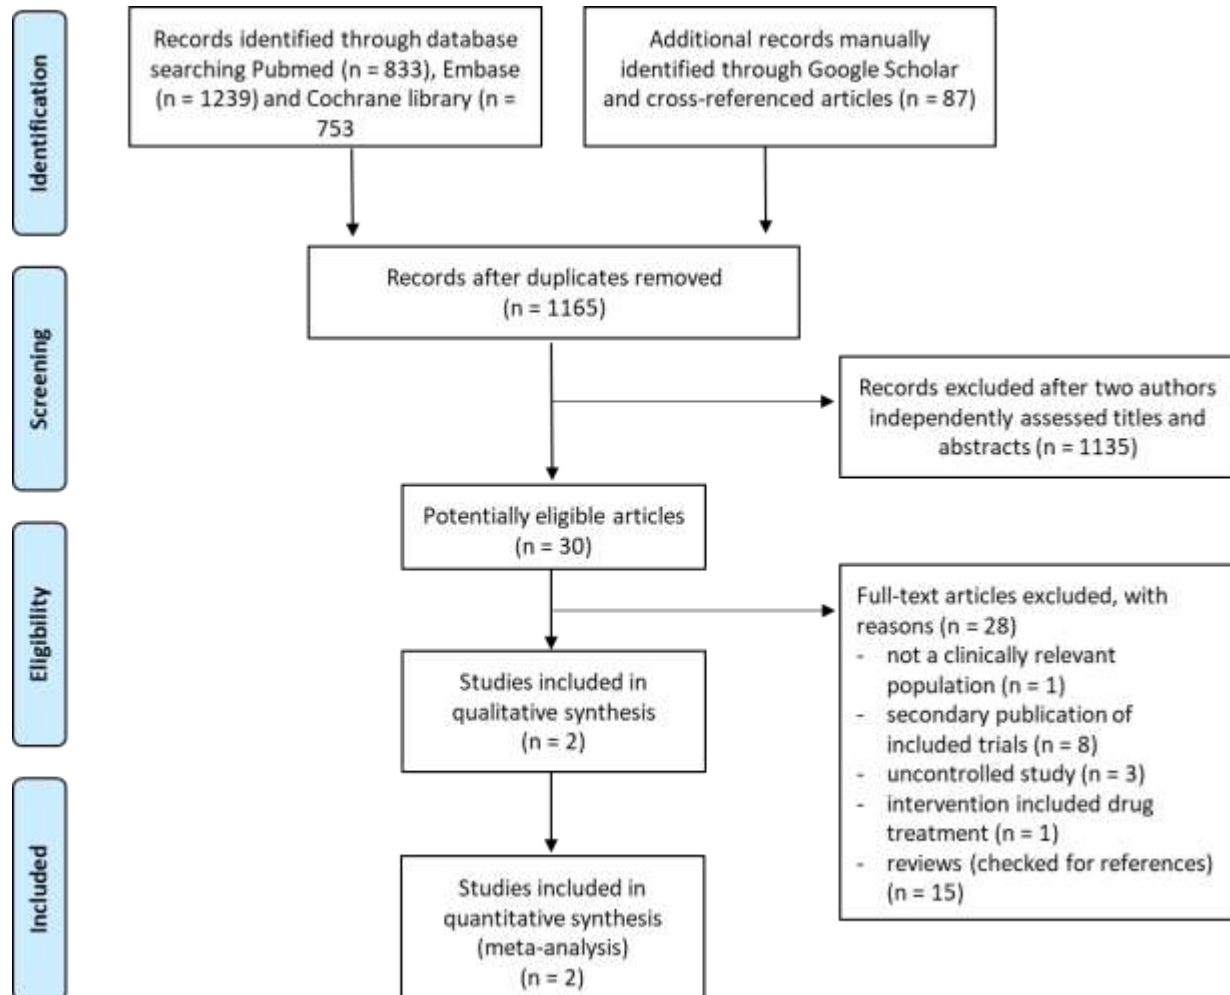

**Question 8: Should a trial of antibiotics be used in children with chronic wet cough with normal chest x ray, normal spirometry and no warning signs?**

Last search: June 2018

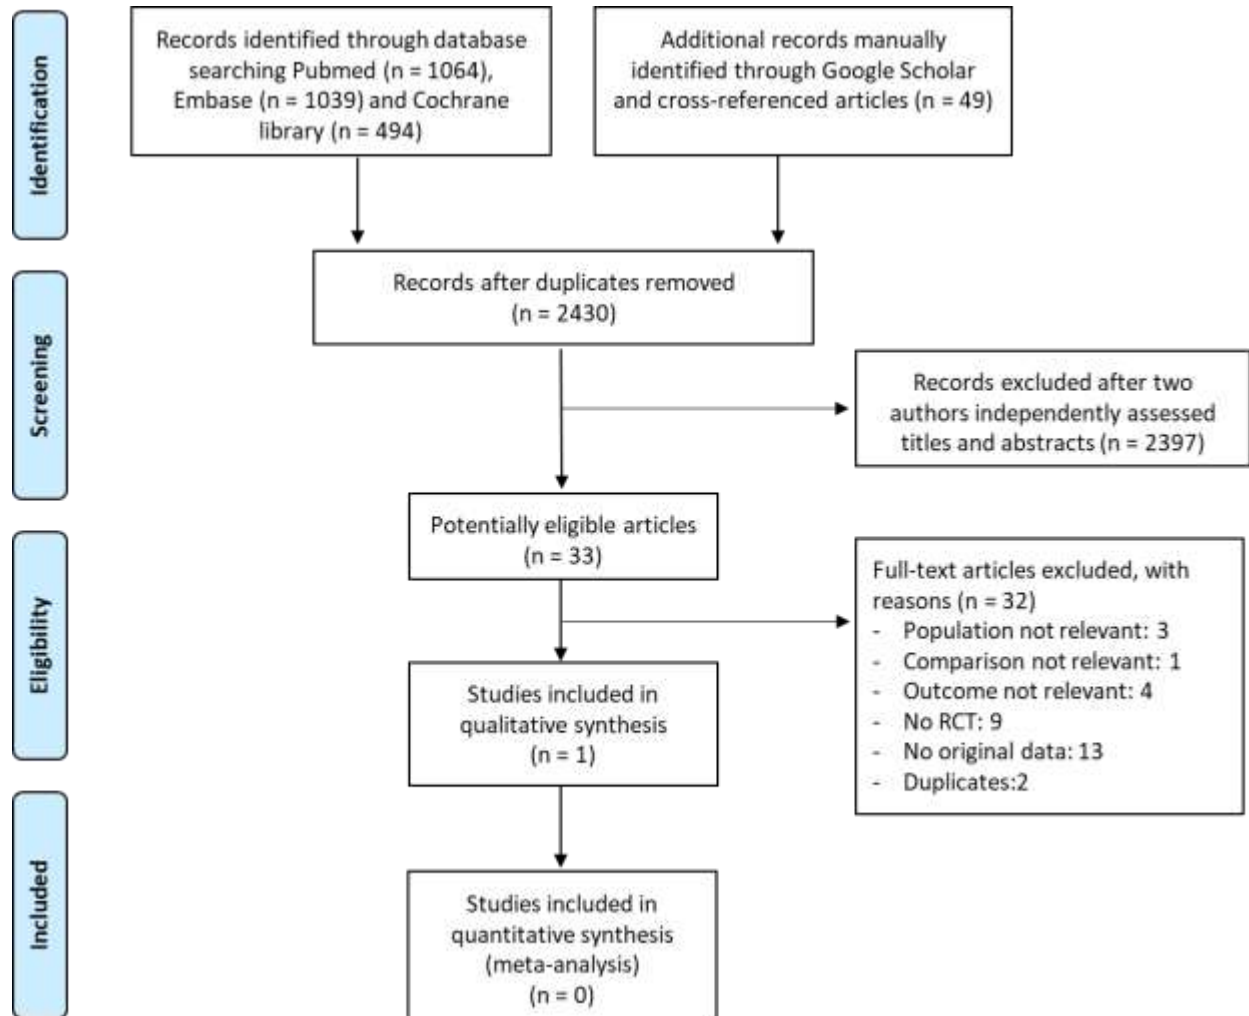

## 5. Evidence GRADE profiles

**Question 1: Should chest CT be routinely performed on chronic cough patient with normal chest X-ray and physical examination?**

**Summary of finding table including GRADE assessment (GRADE Evidence Profile).**

| Quality assessment   |               |                      |                      |                      |                      |                      | Effect                                                                                                                                                                                                                                                                                                                                                                                                                                                                                                                                                                                                                                                                                                                                                                                   | Quality                 | Importance |
|----------------------|---------------|----------------------|----------------------|----------------------|----------------------|----------------------|------------------------------------------------------------------------------------------------------------------------------------------------------------------------------------------------------------------------------------------------------------------------------------------------------------------------------------------------------------------------------------------------------------------------------------------------------------------------------------------------------------------------------------------------------------------------------------------------------------------------------------------------------------------------------------------------------------------------------------------------------------------------------------------|-------------------------|------------|
| No of studies        | Study design  | Risk of bias         | Inconsistency        | Indirectness         | Imprecision          | Other considerations |                                                                                                                                                                                                                                                                                                                                                                                                                                                                                                                                                                                                                                                                                                                                                                                          |                         |            |
| Diagnostic yield     |               |                      |                      |                      |                      |                      |                                                                                                                                                                                                                                                                                                                                                                                                                                                                                                                                                                                                                                                                                                                                                                                          |                         |            |
| 4 <sup>1,2,3,4</sup> | Observational | serious <sup>a</sup> | serious <sup>b</sup> | serious <sup>c</sup> | serious <sup>d</sup> | none                 | <p><b>Prospective study:</b></p> <ul style="list-style-type: none"><li>- Kastelik 2005: 3 out of 46 (6.5%) CT findings despite normal chest X-rays (specific findings were not described; causal relationship of each finding was not specified)</li></ul> <p><b>Retrospective studies:</b></p> <ul style="list-style-type: none"><li>- McGarvey 1998: 20 out of 34 (58%) CT findings despite normal chest X-rays (specific findings were not described; causal relationship of each finding was not specified)</li><li>- Barnes 2004: 9 out of 21 (43%) CT findings despite normal chest X-rays (none were likely to explain cough)</li><li>- Truba 2018: 21 out of 59 (36%) CT findings despite normal chest X-rays. (Causal relationship of each finding was not specified)</li></ul> | ⊕○○○<br><b>VERY LOW</b> | IMPORTANT  |

**CI:** Confidence interval; **MD:** Mean difference; **RR:** Risk ratio; **HR:** Hazard Ratio

### Explanations

- In most of studies CT scan was only performed in a subgroup of patients (about half of them)
- Rate of positive findings varied broadly (from 6.5% to 58%)
- Diagnostic yield / diagnostic accuracy are indirect findings of the effectiveness of CT scan on patients' important outcomes
- Specific findings o causal relationship not described or not likely to explain the cough, the impact on final patient management and outcomes in comparison to not performing CT is not known.

### References

- Kastelik JA, Aziz I, Ojoo JC, Thompson RH, Redington AE, Morice AH. Investigation and management of chronic cough using a probability-based algorithm. Eur Respir J. 2005 Feb;25(2):235-43.
- Barnes TW, Afessa B, Swanson KL, Lim KG. The clinical utility of flexible bronchoscopy in the evaluation of chronic cough. Chest. 2004 Jul;126(1):268-72.
- Truba O, Rybka A, Klimowicz K, Grabczak EM, Żukowska M, Dąbrowska M, Krenke R. Is a normal chest radiograph sufficient to exclude pulmonary abnormalities potentially associated with chronic cough? Adv Respir Med. 2018;86(3).
- McGarvey LP, Heaney LG, Lawson JT, Johnston BT, Scally CM, Ennis M, Shepherd DR, MacMahon J. Evaluation and outcome of patients with chronic non-productive cough using a comprehensive diagnostic protocol. Thorax. 1998 Sep;53(9):738-43.

### Summary of finding table including GRADE assessment (GRADE Evidence Profile) - ANTI-LEUKOTRIENES

| Certainty assessment                             |                   |                      |               |              |                      |                      | № of patients                                                                                                                                                                                                          |                     | Effect            |                   | Certainty   | Importance |
|--------------------------------------------------|-------------------|----------------------|---------------|--------------|----------------------|----------------------|------------------------------------------------------------------------------------------------------------------------------------------------------------------------------------------------------------------------|---------------------|-------------------|-------------------|-------------|------------|
| № of studies                                     | Study design      | Risk of bias         | Inconsistency | Indirectness | Imprecision          | Other considerations | FeNO measurement                                                                                                                                                                                                       | no FeNO measurement | Relative (95% CI) | Absolute (95% CI) |             |            |
| Cough frequency: 24-hours cough count at 2 weeks |                   |                      |               |              |                      |                      |                                                                                                                                                                                                                        |                     |                   |                   |             |            |
| 1 <sup>1</sup>                                   | randomised trials | serious <sup>a</sup> | not serious   | not serious  | serious <sup>b</sup> | none                 | 24-hours cough count at 2 weeks decreased in both groups (low and high FeNO at baseline) without differences between them:<br><br>-117.00 [95%CI -354.57 to 120.57] and -119.00 [95%CI -224.43, -13.57] respectively   |                     |                   |                   | ⊕⊕○○<br>LOW | CRITICAL   |
|                                                  |                   |                      |               |              |                      |                      |                                                                                                                                                                                                                        |                     |                   |                   |             |            |
| Cough frequency: 24-hours cough count at 4 weeks |                   |                      |               |              |                      |                      |                                                                                                                                                                                                                        |                     |                   |                   |             |            |
| 1 <sup>1</sup>                                   | randomised trials | serious <sup>a</sup> | not serious   | not serious  | serious <sup>b</sup> | none                 | 24-hours cough count at 4 weeks decreased in both groups (low and high FeNO at baseline) without differences between them:<br><br>-301.00 [95%CI -524.89 to -77.11] and -142.00 [95%CI -259.24 to -24.76] respectively |                     |                   |                   | ⊕⊕○○<br>LOW | CRITICAL   |
|                                                  |                   |                      |               |              |                      |                      |                                                                                                                                                                                                                        |                     |                   |                   |             |            |

| Quality of life specific questionnaires – LCQ (Leicester Cough Questionnaire). Range 3 to 21 points; higher scores indicate better quality of life. MID is estimated to be 1.3 points; Follow up: 2 weeks |                   |                      |             |             |                      |       |                                                                                                                                                                                                                                                                                                                                                                                                                                                                                                                                                                                                                                                                                                                                                                                                                                                                                                                                                                                                                                                                                                                                                                                                                                                                                                                                                                                                                                                                                                                                                                                                                                                                                             |                    |                                      |                                      |  |          |  |  |        |                                      |                                      |      |    |       |      |    |       |                       |  |  |  |  |  |  |  |  |  |              |    |   |    |    |   |    |        |                    |  |                   |  |  |    |  |  |    |        |                    |  |                               |  |  |  |  |  |  |  |  |  |                                              |  |  |  |  |  |  |  |  |  |                        |  |  |  |  |  |  |  |  |  |              |    |   |    |    |   |    |        |                    |  |                   |  |  |    |  |  |    |        |                    |  |                               |  |  |  |  |  |  |  |  |  |                                              |  |  |  |  |  |  |  |  |  |                                                                        |  |  |  |  |  |  |  |  |  |             |          |
|-----------------------------------------------------------------------------------------------------------------------------------------------------------------------------------------------------------|-------------------|----------------------|-------------|-------------|----------------------|-------|---------------------------------------------------------------------------------------------------------------------------------------------------------------------------------------------------------------------------------------------------------------------------------------------------------------------------------------------------------------------------------------------------------------------------------------------------------------------------------------------------------------------------------------------------------------------------------------------------------------------------------------------------------------------------------------------------------------------------------------------------------------------------------------------------------------------------------------------------------------------------------------------------------------------------------------------------------------------------------------------------------------------------------------------------------------------------------------------------------------------------------------------------------------------------------------------------------------------------------------------------------------------------------------------------------------------------------------------------------------------------------------------------------------------------------------------------------------------------------------------------------------------------------------------------------------------------------------------------------------------------------------------------------------------------------------------|--------------------|--------------------------------------|--------------------------------------|--|----------|--|--|--------|--------------------------------------|--------------------------------------|------|----|-------|------|----|-------|-----------------------|--|--|--|--|--|--|--|--|--|--------------|----|---|----|----|---|----|--------|--------------------|--|-------------------|--|--|----|--|--|----|--------|--------------------|--|-------------------------------|--|--|--|--|--|--|--|--|--|----------------------------------------------|--|--|--|--|--|--|--|--|--|------------------------|--|--|--|--|--|--|--|--|--|--------------|----|---|----|----|---|----|--------|--------------------|--|-------------------|--|--|----|--|--|----|--------|--------------------|--|-------------------------------|--|--|--|--|--|--|--|--|--|----------------------------------------------|--|--|--|--|--|--|--|--|--|------------------------------------------------------------------------|--|--|--|--|--|--|--|--|--|-------------|----------|
| 1 <sup>1</sup>                                                                                                                                                                                            | randomised trials | serious <sup>a</sup> | not serious | not serious | serious <sup>b</sup> | none  | <p>LCQ score at 2 weeks improved in both groups (low and high FeNO at baseline) without differences between them:</p> <p>2.00 [95%CI -0.38 to 4.38] and 1.00 [95%CI -1.23 to 3.23] respectively</p> <table><thead><tr><th rowspan="2">Study or Subgroup</th><th colspan="3">2 weeks</th><th colspan="3">Baseline</th><th rowspan="2">Weight</th><th rowspan="2">Mean Difference<br/>IV, Fixed, 95% CI</th><th rowspan="2">Mean Difference<br/>IV, Fixed, 95% CI</th></tr><tr><th>Mean</th><th>SD</th><th>Total</th><th>Mean</th><th>SD</th><th>Total</th></tr></thead><tbody><tr><td colspan="10"><b>1.2.1 Low FeNO</b></td></tr><tr><td>Sadeghi 2018</td><td>14</td><td>3</td><td>17</td><td>12</td><td>4</td><td>17</td><td>100.0%</td><td>2.00 [-0.38, 4.38]</td><td></td></tr><tr><td>Subtotal (95% CI)</td><td></td><td></td><td>17</td><td></td><td></td><td>17</td><td>100.0%</td><td>2.00 [-0.38, 4.38]</td><td></td></tr><tr><td colspan="10">Heterogeneity: Not applicable</td></tr><tr><td colspan="10">Test for overall effect: Z = 1.65 (P = 0.10)</td></tr><tr><td colspan="10"><b>1.2.2 High FeNO</b></td></tr><tr><td>Sadeghi 2018</td><td>15</td><td>3</td><td>10</td><td>14</td><td>3</td><td>10</td><td>100.0%</td><td>1.00 [-1.23, 3.23]</td><td></td></tr><tr><td>Subtotal (95% CI)</td><td></td><td></td><td>10</td><td></td><td></td><td>10</td><td>100.0%</td><td>1.00 [-1.23, 3.23]</td><td></td></tr><tr><td colspan="10">Heterogeneity: Not applicable</td></tr><tr><td colspan="10">Test for overall effect: Z = 0.88 (P = 0.38)</td></tr><tr><td colspan="10">Test for subgroup differences: Chi² = 0.38, df = 1 (P = 0.55), I² = 0%</td></tr></tbody></table> | Study or Subgroup  | 2 weeks                              |                                      |  | Baseline |  |  | Weight | Mean Difference<br>IV, Fixed, 95% CI | Mean Difference<br>IV, Fixed, 95% CI | Mean | SD | Total | Mean | SD | Total | <b>1.2.1 Low FeNO</b> |  |  |  |  |  |  |  |  |  | Sadeghi 2018 | 14 | 3 | 17 | 12 | 4 | 17 | 100.0% | 2.00 [-0.38, 4.38] |  | Subtotal (95% CI) |  |  | 17 |  |  | 17 | 100.0% | 2.00 [-0.38, 4.38] |  | Heterogeneity: Not applicable |  |  |  |  |  |  |  |  |  | Test for overall effect: Z = 1.65 (P = 0.10) |  |  |  |  |  |  |  |  |  | <b>1.2.2 High FeNO</b> |  |  |  |  |  |  |  |  |  | Sadeghi 2018 | 15 | 3 | 10 | 14 | 3 | 10 | 100.0% | 1.00 [-1.23, 3.23] |  | Subtotal (95% CI) |  |  | 10 |  |  | 10 | 100.0% | 1.00 [-1.23, 3.23] |  | Heterogeneity: Not applicable |  |  |  |  |  |  |  |  |  | Test for overall effect: Z = 0.88 (P = 0.38) |  |  |  |  |  |  |  |  |  | Test for subgroup differences: Chi² = 0.38, df = 1 (P = 0.55), I² = 0% |  |  |  |  |  |  |  |  |  | ⊕⊕○○<br>LOW | CRITICAL |
| Study or Subgroup                                                                                                                                                                                         | 2 weeks           |                      |             | Baseline    |                      |       | Weight                                                                                                                                                                                                                                                                                                                                                                                                                                                                                                                                                                                                                                                                                                                                                                                                                                                                                                                                                                                                                                                                                                                                                                                                                                                                                                                                                                                                                                                                                                                                                                                                                                                                                      |                    | Mean Difference<br>IV, Fixed, 95% CI | Mean Difference<br>IV, Fixed, 95% CI |  |          |  |  |        |                                      |                                      |      |    |       |      |    |       |                       |  |  |  |  |  |  |  |  |  |              |    |   |    |    |   |    |        |                    |  |                   |  |  |    |  |  |    |        |                    |  |                               |  |  |  |  |  |  |  |  |  |                                              |  |  |  |  |  |  |  |  |  |                        |  |  |  |  |  |  |  |  |  |              |    |   |    |    |   |    |        |                    |  |                   |  |  |    |  |  |    |        |                    |  |                               |  |  |  |  |  |  |  |  |  |                                              |  |  |  |  |  |  |  |  |  |                                                                        |  |  |  |  |  |  |  |  |  |             |          |
|                                                                                                                                                                                                           | Mean              | SD                   | Total       | Mean        | SD                   | Total |                                                                                                                                                                                                                                                                                                                                                                                                                                                                                                                                                                                                                                                                                                                                                                                                                                                                                                                                                                                                                                                                                                                                                                                                                                                                                                                                                                                                                                                                                                                                                                                                                                                                                             |                    |                                      |                                      |  |          |  |  |        |                                      |                                      |      |    |       |      |    |       |                       |  |  |  |  |  |  |  |  |  |              |    |   |    |    |   |    |        |                    |  |                   |  |  |    |  |  |    |        |                    |  |                               |  |  |  |  |  |  |  |  |  |                                              |  |  |  |  |  |  |  |  |  |                        |  |  |  |  |  |  |  |  |  |              |    |   |    |    |   |    |        |                    |  |                   |  |  |    |  |  |    |        |                    |  |                               |  |  |  |  |  |  |  |  |  |                                              |  |  |  |  |  |  |  |  |  |                                                                        |  |  |  |  |  |  |  |  |  |             |          |
| <b>1.2.1 Low FeNO</b>                                                                                                                                                                                     |                   |                      |             |             |                      |       |                                                                                                                                                                                                                                                                                                                                                                                                                                                                                                                                                                                                                                                                                                                                                                                                                                                                                                                                                                                                                                                                                                                                                                                                                                                                                                                                                                                                                                                                                                                                                                                                                                                                                             |                    |                                      |                                      |  |          |  |  |        |                                      |                                      |      |    |       |      |    |       |                       |  |  |  |  |  |  |  |  |  |              |    |   |    |    |   |    |        |                    |  |                   |  |  |    |  |  |    |        |                    |  |                               |  |  |  |  |  |  |  |  |  |                                              |  |  |  |  |  |  |  |  |  |                        |  |  |  |  |  |  |  |  |  |              |    |   |    |    |   |    |        |                    |  |                   |  |  |    |  |  |    |        |                    |  |                               |  |  |  |  |  |  |  |  |  |                                              |  |  |  |  |  |  |  |  |  |                                                                        |  |  |  |  |  |  |  |  |  |             |          |
| Sadeghi 2018                                                                                                                                                                                              | 14                | 3                    | 17          | 12          | 4                    | 17    | 100.0%                                                                                                                                                                                                                                                                                                                                                                                                                                                                                                                                                                                                                                                                                                                                                                                                                                                                                                                                                                                                                                                                                                                                                                                                                                                                                                                                                                                                                                                                                                                                                                                                                                                                                      | 2.00 [-0.38, 4.38] |                                      |                                      |  |          |  |  |        |                                      |                                      |      |    |       |      |    |       |                       |  |  |  |  |  |  |  |  |  |              |    |   |    |    |   |    |        |                    |  |                   |  |  |    |  |  |    |        |                    |  |                               |  |  |  |  |  |  |  |  |  |                                              |  |  |  |  |  |  |  |  |  |                        |  |  |  |  |  |  |  |  |  |              |    |   |    |    |   |    |        |                    |  |                   |  |  |    |  |  |    |        |                    |  |                               |  |  |  |  |  |  |  |  |  |                                              |  |  |  |  |  |  |  |  |  |                                                                        |  |  |  |  |  |  |  |  |  |             |          |
| Subtotal (95% CI)                                                                                                                                                                                         |                   |                      | 17          |             |                      | 17    | 100.0%                                                                                                                                                                                                                                                                                                                                                                                                                                                                                                                                                                                                                                                                                                                                                                                                                                                                                                                                                                                                                                                                                                                                                                                                                                                                                                                                                                                                                                                                                                                                                                                                                                                                                      | 2.00 [-0.38, 4.38] |                                      |                                      |  |          |  |  |        |                                      |                                      |      |    |       |      |    |       |                       |  |  |  |  |  |  |  |  |  |              |    |   |    |    |   |    |        |                    |  |                   |  |  |    |  |  |    |        |                    |  |                               |  |  |  |  |  |  |  |  |  |                                              |  |  |  |  |  |  |  |  |  |                        |  |  |  |  |  |  |  |  |  |              |    |   |    |    |   |    |        |                    |  |                   |  |  |    |  |  |    |        |                    |  |                               |  |  |  |  |  |  |  |  |  |                                              |  |  |  |  |  |  |  |  |  |                                                                        |  |  |  |  |  |  |  |  |  |             |          |
| Heterogeneity: Not applicable                                                                                                                                                                             |                   |                      |             |             |                      |       |                                                                                                                                                                                                                                                                                                                                                                                                                                                                                                                                                                                                                                                                                                                                                                                                                                                                                                                                                                                                                                                                                                                                                                                                                                                                                                                                                                                                                                                                                                                                                                                                                                                                                             |                    |                                      |                                      |  |          |  |  |        |                                      |                                      |      |    |       |      |    |       |                       |  |  |  |  |  |  |  |  |  |              |    |   |    |    |   |    |        |                    |  |                   |  |  |    |  |  |    |        |                    |  |                               |  |  |  |  |  |  |  |  |  |                                              |  |  |  |  |  |  |  |  |  |                        |  |  |  |  |  |  |  |  |  |              |    |   |    |    |   |    |        |                    |  |                   |  |  |    |  |  |    |        |                    |  |                               |  |  |  |  |  |  |  |  |  |                                              |  |  |  |  |  |  |  |  |  |                                                                        |  |  |  |  |  |  |  |  |  |             |          |
| Test for overall effect: Z = 1.65 (P = 0.10)                                                                                                                                                              |                   |                      |             |             |                      |       |                                                                                                                                                                                                                                                                                                                                                                                                                                                                                                                                                                                                                                                                                                                                                                                                                                                                                                                                                                                                                                                                                                                                                                                                                                                                                                                                                                                                                                                                                                                                                                                                                                                                                             |                    |                                      |                                      |  |          |  |  |        |                                      |                                      |      |    |       |      |    |       |                       |  |  |  |  |  |  |  |  |  |              |    |   |    |    |   |    |        |                    |  |                   |  |  |    |  |  |    |        |                    |  |                               |  |  |  |  |  |  |  |  |  |                                              |  |  |  |  |  |  |  |  |  |                        |  |  |  |  |  |  |  |  |  |              |    |   |    |    |   |    |        |                    |  |                   |  |  |    |  |  |    |        |                    |  |                               |  |  |  |  |  |  |  |  |  |                                              |  |  |  |  |  |  |  |  |  |                                                                        |  |  |  |  |  |  |  |  |  |             |          |
| <b>1.2.2 High FeNO</b>                                                                                                                                                                                    |                   |                      |             |             |                      |       |                                                                                                                                                                                                                                                                                                                                                                                                                                                                                                                                                                                                                                                                                                                                                                                                                                                                                                                                                                                                                                                                                                                                                                                                                                                                                                                                                                                                                                                                                                                                                                                                                                                                                             |                    |                                      |                                      |  |          |  |  |        |                                      |                                      |      |    |       |      |    |       |                       |  |  |  |  |  |  |  |  |  |              |    |   |    |    |   |    |        |                    |  |                   |  |  |    |  |  |    |        |                    |  |                               |  |  |  |  |  |  |  |  |  |                                              |  |  |  |  |  |  |  |  |  |                        |  |  |  |  |  |  |  |  |  |              |    |   |    |    |   |    |        |                    |  |                   |  |  |    |  |  |    |        |                    |  |                               |  |  |  |  |  |  |  |  |  |                                              |  |  |  |  |  |  |  |  |  |                                                                        |  |  |  |  |  |  |  |  |  |             |          |
| Sadeghi 2018                                                                                                                                                                                              | 15                | 3                    | 10          | 14          | 3                    | 10    | 100.0%                                                                                                                                                                                                                                                                                                                                                                                                                                                                                                                                                                                                                                                                                                                                                                                                                                                                                                                                                                                                                                                                                                                                                                                                                                                                                                                                                                                                                                                                                                                                                                                                                                                                                      | 1.00 [-1.23, 3.23] |                                      |                                      |  |          |  |  |        |                                      |                                      |      |    |       |      |    |       |                       |  |  |  |  |  |  |  |  |  |              |    |   |    |    |   |    |        |                    |  |                   |  |  |    |  |  |    |        |                    |  |                               |  |  |  |  |  |  |  |  |  |                                              |  |  |  |  |  |  |  |  |  |                        |  |  |  |  |  |  |  |  |  |              |    |   |    |    |   |    |        |                    |  |                   |  |  |    |  |  |    |        |                    |  |                               |  |  |  |  |  |  |  |  |  |                                              |  |  |  |  |  |  |  |  |  |                                                                        |  |  |  |  |  |  |  |  |  |             |          |
| Subtotal (95% CI)                                                                                                                                                                                         |                   |                      | 10          |             |                      | 10    | 100.0%                                                                                                                                                                                                                                                                                                                                                                                                                                                                                                                                                                                                                                                                                                                                                                                                                                                                                                                                                                                                                                                                                                                                                                                                                                                                                                                                                                                                                                                                                                                                                                                                                                                                                      | 1.00 [-1.23, 3.23] |                                      |                                      |  |          |  |  |        |                                      |                                      |      |    |       |      |    |       |                       |  |  |  |  |  |  |  |  |  |              |    |   |    |    |   |    |        |                    |  |                   |  |  |    |  |  |    |        |                    |  |                               |  |  |  |  |  |  |  |  |  |                                              |  |  |  |  |  |  |  |  |  |                        |  |  |  |  |  |  |  |  |  |              |    |   |    |    |   |    |        |                    |  |                   |  |  |    |  |  |    |        |                    |  |                               |  |  |  |  |  |  |  |  |  |                                              |  |  |  |  |  |  |  |  |  |                                                                        |  |  |  |  |  |  |  |  |  |             |          |
| Heterogeneity: Not applicable                                                                                                                                                                             |                   |                      |             |             |                      |       |                                                                                                                                                                                                                                                                                                                                                                                                                                                                                                                                                                                                                                                                                                                                                                                                                                                                                                                                                                                                                                                                                                                                                                                                                                                                                                                                                                                                                                                                                                                                                                                                                                                                                             |                    |                                      |                                      |  |          |  |  |        |                                      |                                      |      |    |       |      |    |       |                       |  |  |  |  |  |  |  |  |  |              |    |   |    |    |   |    |        |                    |  |                   |  |  |    |  |  |    |        |                    |  |                               |  |  |  |  |  |  |  |  |  |                                              |  |  |  |  |  |  |  |  |  |                        |  |  |  |  |  |  |  |  |  |              |    |   |    |    |   |    |        |                    |  |                   |  |  |    |  |  |    |        |                    |  |                               |  |  |  |  |  |  |  |  |  |                                              |  |  |  |  |  |  |  |  |  |                                                                        |  |  |  |  |  |  |  |  |  |             |          |
| Test for overall effect: Z = 0.88 (P = 0.38)                                                                                                                                                              |                   |                      |             |             |                      |       |                                                                                                                                                                                                                                                                                                                                                                                                                                                                                                                                                                                                                                                                                                                                                                                                                                                                                                                                                                                                                                                                                                                                                                                                                                                                                                                                                                                                                                                                                                                                                                                                                                                                                             |                    |                                      |                                      |  |          |  |  |        |                                      |                                      |      |    |       |      |    |       |                       |  |  |  |  |  |  |  |  |  |              |    |   |    |    |   |    |        |                    |  |                   |  |  |    |  |  |    |        |                    |  |                               |  |  |  |  |  |  |  |  |  |                                              |  |  |  |  |  |  |  |  |  |                        |  |  |  |  |  |  |  |  |  |              |    |   |    |    |   |    |        |                    |  |                   |  |  |    |  |  |    |        |                    |  |                               |  |  |  |  |  |  |  |  |  |                                              |  |  |  |  |  |  |  |  |  |                                                                        |  |  |  |  |  |  |  |  |  |             |          |
| Test for subgroup differences: Chi² = 0.38, df = 1 (P = 0.55), I² = 0%                                                                                                                                    |                   |                      |             |             |                      |       |                                                                                                                                                                                                                                                                                                                                                                                                                                                                                                                                                                                                                                                                                                                                                                                                                                                                                                                                                                                                                                                                                                                                                                                                                                                                                                                                                                                                                                                                                                                                                                                                                                                                                             |                    |                                      |                                      |  |          |  |  |        |                                      |                                      |      |    |       |      |    |       |                       |  |  |  |  |  |  |  |  |  |              |    |   |    |    |   |    |        |                    |  |                   |  |  |    |  |  |    |        |                    |  |                               |  |  |  |  |  |  |  |  |  |                                              |  |  |  |  |  |  |  |  |  |                        |  |  |  |  |  |  |  |  |  |              |    |   |    |    |   |    |        |                    |  |                   |  |  |    |  |  |    |        |                    |  |                               |  |  |  |  |  |  |  |  |  |                                              |  |  |  |  |  |  |  |  |  |                                                                        |  |  |  |  |  |  |  |  |  |             |          |
| Quality of life specific questionnaires – LCQ (Leicester Cough Questionnaire). Range 3 to 21 points; higher scores indicate better quality of life. MID is estimated to be 1.3 points; Follow up: 4 weeks |                   |                      |             |             |                      |       |                                                                                                                                                                                                                                                                                                                                                                                                                                                                                                                                                                                                                                                                                                                                                                                                                                                                                                                                                                                                                                                                                                                                                                                                                                                                                                                                                                                                                                                                                                                                                                                                                                                                                             |                    |                                      |                                      |  |          |  |  |        |                                      |                                      |      |    |       |      |    |       |                       |  |  |  |  |  |  |  |  |  |              |    |   |    |    |   |    |        |                    |  |                   |  |  |    |  |  |    |        |                    |  |                               |  |  |  |  |  |  |  |  |  |                                              |  |  |  |  |  |  |  |  |  |                        |  |  |  |  |  |  |  |  |  |              |    |   |    |    |   |    |        |                    |  |                   |  |  |    |  |  |    |        |                    |  |                               |  |  |  |  |  |  |  |  |  |                                              |  |  |  |  |  |  |  |  |  |                                                                        |  |  |  |  |  |  |  |  |  |             |          |
| 1 <sup>1</sup>                                                                                                                                                                                            | randomised trials | serious <sup>a</sup> | not serious | not serious | serious <sup>b</sup> | none  | <p>LCQ score at 4 weeks improved in both groups (low and high FeNO at baseline) without differences between them:</p> <p>3.00 [95%CI 0.62 to 5.38] and 2.00 [95%CI -0.23 to 4.23] respectively</p> <table><thead><tr><th rowspan="2">Study or Subgroup</th><th colspan="3">4 weeks</th><th colspan="3">Baseline</th><th rowspan="2">Weight</th><th rowspan="2">Mean Difference<br/>IV, Fixed, 95% CI</th><th rowspan="2">Mean Difference<br/>IV, Fixed, 95% CI</th></tr><tr><th>Mean</th><th>SD</th><th>Total</th><th>Mean</th><th>SD</th><th>Total</th></tr></thead><tbody><tr><td colspan="10"><b>2.2.1 Low FeNO</b></td></tr><tr><td>Sadeghi 2018</td><td>15</td><td>3</td><td>17</td><td>12</td><td>4</td><td>17</td><td>100.0%</td><td>3.00 [0.62, 5.38]</td><td></td></tr><tr><td>Subtotal (95% CI)</td><td></td><td></td><td>17</td><td></td><td></td><td>17</td><td>100.0%</td><td>3.00 [0.62, 5.38]</td><td></td></tr><tr><td colspan="10">Heterogeneity: Not applicable</td></tr><tr><td colspan="10">Test for overall effect: Z = 2.47 (P = 0.01)</td></tr><tr><td colspan="10"><b>2.2.2 High FeNO</b></td></tr><tr><td>Sadeghi 2018</td><td>16</td><td>2</td><td>10</td><td>14</td><td>3</td><td>10</td><td>100.0%</td><td>2.00 [-0.23, 4.23]</td><td></td></tr><tr><td>Subtotal (95% CI)</td><td></td><td></td><td>10</td><td></td><td></td><td>10</td><td>100.0%</td><td>2.00 [-0.23, 4.23]</td><td></td></tr><tr><td colspan="10">Heterogeneity: Not applicable</td></tr><tr><td colspan="10">Test for overall effect: Z = 1.75 (P = 0.08)</td></tr><tr><td colspan="10">Test for subgroup differences: Chi² = 0.38, df = 1 (P = 0.55), I² = 0%</td></tr></tbody></table>    | Study or Subgroup  | 4 weeks                              |                                      |  | Baseline |  |  | Weight | Mean Difference<br>IV, Fixed, 95% CI | Mean Difference<br>IV, Fixed, 95% CI | Mean | SD | Total | Mean | SD | Total | <b>2.2.1 Low FeNO</b> |  |  |  |  |  |  |  |  |  | Sadeghi 2018 | 15 | 3 | 17 | 12 | 4 | 17 | 100.0% | 3.00 [0.62, 5.38]  |  | Subtotal (95% CI) |  |  | 17 |  |  | 17 | 100.0% | 3.00 [0.62, 5.38]  |  | Heterogeneity: Not applicable |  |  |  |  |  |  |  |  |  | Test for overall effect: Z = 2.47 (P = 0.01) |  |  |  |  |  |  |  |  |  | <b>2.2.2 High FeNO</b> |  |  |  |  |  |  |  |  |  | Sadeghi 2018 | 16 | 2 | 10 | 14 | 3 | 10 | 100.0% | 2.00 [-0.23, 4.23] |  | Subtotal (95% CI) |  |  | 10 |  |  | 10 | 100.0% | 2.00 [-0.23, 4.23] |  | Heterogeneity: Not applicable |  |  |  |  |  |  |  |  |  | Test for overall effect: Z = 1.75 (P = 0.08) |  |  |  |  |  |  |  |  |  | Test for subgroup differences: Chi² = 0.38, df = 1 (P = 0.55), I² = 0% |  |  |  |  |  |  |  |  |  | ⊕⊕○○<br>LOW | CRITICAL |
| Study or Subgroup                                                                                                                                                                                         | 4 weeks           |                      |             | Baseline    |                      |       | Weight                                                                                                                                                                                                                                                                                                                                                                                                                                                                                                                                                                                                                                                                                                                                                                                                                                                                                                                                                                                                                                                                                                                                                                                                                                                                                                                                                                                                                                                                                                                                                                                                                                                                                      |                    | Mean Difference<br>IV, Fixed, 95% CI | Mean Difference<br>IV, Fixed, 95% CI |  |          |  |  |        |                                      |                                      |      |    |       |      |    |       |                       |  |  |  |  |  |  |  |  |  |              |    |   |    |    |   |    |        |                    |  |                   |  |  |    |  |  |    |        |                    |  |                               |  |  |  |  |  |  |  |  |  |                                              |  |  |  |  |  |  |  |  |  |                        |  |  |  |  |  |  |  |  |  |              |    |   |    |    |   |    |        |                    |  |                   |  |  |    |  |  |    |        |                    |  |                               |  |  |  |  |  |  |  |  |  |                                              |  |  |  |  |  |  |  |  |  |                                                                        |  |  |  |  |  |  |  |  |  |             |          |
|                                                                                                                                                                                                           | Mean              | SD                   | Total       | Mean        | SD                   | Total |                                                                                                                                                                                                                                                                                                                                                                                                                                                                                                                                                                                                                                                                                                                                                                                                                                                                                                                                                                                                                                                                                                                                                                                                                                                                                                                                                                                                                                                                                                                                                                                                                                                                                             |                    |                                      |                                      |  |          |  |  |        |                                      |                                      |      |    |       |      |    |       |                       |  |  |  |  |  |  |  |  |  |              |    |   |    |    |   |    |        |                    |  |                   |  |  |    |  |  |    |        |                    |  |                               |  |  |  |  |  |  |  |  |  |                                              |  |  |  |  |  |  |  |  |  |                        |  |  |  |  |  |  |  |  |  |              |    |   |    |    |   |    |        |                    |  |                   |  |  |    |  |  |    |        |                    |  |                               |  |  |  |  |  |  |  |  |  |                                              |  |  |  |  |  |  |  |  |  |                                                                        |  |  |  |  |  |  |  |  |  |             |          |
| <b>2.2.1 Low FeNO</b>                                                                                                                                                                                     |                   |                      |             |             |                      |       |                                                                                                                                                                                                                                                                                                                                                                                                                                                                                                                                                                                                                                                                                                                                                                                                                                                                                                                                                                                                                                                                                                                                                                                                                                                                                                                                                                                                                                                                                                                                                                                                                                                                                             |                    |                                      |                                      |  |          |  |  |        |                                      |                                      |      |    |       |      |    |       |                       |  |  |  |  |  |  |  |  |  |              |    |   |    |    |   |    |        |                    |  |                   |  |  |    |  |  |    |        |                    |  |                               |  |  |  |  |  |  |  |  |  |                                              |  |  |  |  |  |  |  |  |  |                        |  |  |  |  |  |  |  |  |  |              |    |   |    |    |   |    |        |                    |  |                   |  |  |    |  |  |    |        |                    |  |                               |  |  |  |  |  |  |  |  |  |                                              |  |  |  |  |  |  |  |  |  |                                                                        |  |  |  |  |  |  |  |  |  |             |          |
| Sadeghi 2018                                                                                                                                                                                              | 15                | 3                    | 17          | 12          | 4                    | 17    | 100.0%                                                                                                                                                                                                                                                                                                                                                                                                                                                                                                                                                                                                                                                                                                                                                                                                                                                                                                                                                                                                                                                                                                                                                                                                                                                                                                                                                                                                                                                                                                                                                                                                                                                                                      | 3.00 [0.62, 5.38]  |                                      |                                      |  |          |  |  |        |                                      |                                      |      |    |       |      |    |       |                       |  |  |  |  |  |  |  |  |  |              |    |   |    |    |   |    |        |                    |  |                   |  |  |    |  |  |    |        |                    |  |                               |  |  |  |  |  |  |  |  |  |                                              |  |  |  |  |  |  |  |  |  |                        |  |  |  |  |  |  |  |  |  |              |    |   |    |    |   |    |        |                    |  |                   |  |  |    |  |  |    |        |                    |  |                               |  |  |  |  |  |  |  |  |  |                                              |  |  |  |  |  |  |  |  |  |                                                                        |  |  |  |  |  |  |  |  |  |             |          |
| Subtotal (95% CI)                                                                                                                                                                                         |                   |                      | 17          |             |                      | 17    | 100.0%                                                                                                                                                                                                                                                                                                                                                                                                                                                                                                                                                                                                                                                                                                                                                                                                                                                                                                                                                                                                                                                                                                                                                                                                                                                                                                                                                                                                                                                                                                                                                                                                                                                                                      | 3.00 [0.62, 5.38]  |                                      |                                      |  |          |  |  |        |                                      |                                      |      |    |       |      |    |       |                       |  |  |  |  |  |  |  |  |  |              |    |   |    |    |   |    |        |                    |  |                   |  |  |    |  |  |    |        |                    |  |                               |  |  |  |  |  |  |  |  |  |                                              |  |  |  |  |  |  |  |  |  |                        |  |  |  |  |  |  |  |  |  |              |    |   |    |    |   |    |        |                    |  |                   |  |  |    |  |  |    |        |                    |  |                               |  |  |  |  |  |  |  |  |  |                                              |  |  |  |  |  |  |  |  |  |                                                                        |  |  |  |  |  |  |  |  |  |             |          |
| Heterogeneity: Not applicable                                                                                                                                                                             |                   |                      |             |             |                      |       |                                                                                                                                                                                                                                                                                                                                                                                                                                                                                                                                                                                                                                                                                                                                                                                                                                                                                                                                                                                                                                                                                                                                                                                                                                                                                                                                                                                                                                                                                                                                                                                                                                                                                             |                    |                                      |                                      |  |          |  |  |        |                                      |                                      |      |    |       |      |    |       |                       |  |  |  |  |  |  |  |  |  |              |    |   |    |    |   |    |        |                    |  |                   |  |  |    |  |  |    |        |                    |  |                               |  |  |  |  |  |  |  |  |  |                                              |  |  |  |  |  |  |  |  |  |                        |  |  |  |  |  |  |  |  |  |              |    |   |    |    |   |    |        |                    |  |                   |  |  |    |  |  |    |        |                    |  |                               |  |  |  |  |  |  |  |  |  |                                              |  |  |  |  |  |  |  |  |  |                                                                        |  |  |  |  |  |  |  |  |  |             |          |
| Test for overall effect: Z = 2.47 (P = 0.01)                                                                                                                                                              |                   |                      |             |             |                      |       |                                                                                                                                                                                                                                                                                                                                                                                                                                                                                                                                                                                                                                                                                                                                                                                                                                                                                                                                                                                                                                                                                                                                                                                                                                                                                                                                                                                                                                                                                                                                                                                                                                                                                             |                    |                                      |                                      |  |          |  |  |        |                                      |                                      |      |    |       |      |    |       |                       |  |  |  |  |  |  |  |  |  |              |    |   |    |    |   |    |        |                    |  |                   |  |  |    |  |  |    |        |                    |  |                               |  |  |  |  |  |  |  |  |  |                                              |  |  |  |  |  |  |  |  |  |                        |  |  |  |  |  |  |  |  |  |              |    |   |    |    |   |    |        |                    |  |                   |  |  |    |  |  |    |        |                    |  |                               |  |  |  |  |  |  |  |  |  |                                              |  |  |  |  |  |  |  |  |  |                                                                        |  |  |  |  |  |  |  |  |  |             |          |
| <b>2.2.2 High FeNO</b>                                                                                                                                                                                    |                   |                      |             |             |                      |       |                                                                                                                                                                                                                                                                                                                                                                                                                                                                                                                                                                                                                                                                                                                                                                                                                                                                                                                                                                                                                                                                                                                                                                                                                                                                                                                                                                                                                                                                                                                                                                                                                                                                                             |                    |                                      |                                      |  |          |  |  |        |                                      |                                      |      |    |       |      |    |       |                       |  |  |  |  |  |  |  |  |  |              |    |   |    |    |   |    |        |                    |  |                   |  |  |    |  |  |    |        |                    |  |                               |  |  |  |  |  |  |  |  |  |                                              |  |  |  |  |  |  |  |  |  |                        |  |  |  |  |  |  |  |  |  |              |    |   |    |    |   |    |        |                    |  |                   |  |  |    |  |  |    |        |                    |  |                               |  |  |  |  |  |  |  |  |  |                                              |  |  |  |  |  |  |  |  |  |                                                                        |  |  |  |  |  |  |  |  |  |             |          |
| Sadeghi 2018                                                                                                                                                                                              | 16                | 2                    | 10          | 14          | 3                    | 10    | 100.0%                                                                                                                                                                                                                                                                                                                                                                                                                                                                                                                                                                                                                                                                                                                                                                                                                                                                                                                                                                                                                                                                                                                                                                                                                                                                                                                                                                                                                                                                                                                                                                                                                                                                                      | 2.00 [-0.23, 4.23] |                                      |                                      |  |          |  |  |        |                                      |                                      |      |    |       |      |    |       |                       |  |  |  |  |  |  |  |  |  |              |    |   |    |    |   |    |        |                    |  |                   |  |  |    |  |  |    |        |                    |  |                               |  |  |  |  |  |  |  |  |  |                                              |  |  |  |  |  |  |  |  |  |                        |  |  |  |  |  |  |  |  |  |              |    |   |    |    |   |    |        |                    |  |                   |  |  |    |  |  |    |        |                    |  |                               |  |  |  |  |  |  |  |  |  |                                              |  |  |  |  |  |  |  |  |  |                                                                        |  |  |  |  |  |  |  |  |  |             |          |
| Subtotal (95% CI)                                                                                                                                                                                         |                   |                      | 10          |             |                      | 10    | 100.0%                                                                                                                                                                                                                                                                                                                                                                                                                                                                                                                                                                                                                                                                                                                                                                                                                                                                                                                                                                                                                                                                                                                                                                                                                                                                                                                                                                                                                                                                                                                                                                                                                                                                                      | 2.00 [-0.23, 4.23] |                                      |                                      |  |          |  |  |        |                                      |                                      |      |    |       |      |    |       |                       |  |  |  |  |  |  |  |  |  |              |    |   |    |    |   |    |        |                    |  |                   |  |  |    |  |  |    |        |                    |  |                               |  |  |  |  |  |  |  |  |  |                                              |  |  |  |  |  |  |  |  |  |                        |  |  |  |  |  |  |  |  |  |              |    |   |    |    |   |    |        |                    |  |                   |  |  |    |  |  |    |        |                    |  |                               |  |  |  |  |  |  |  |  |  |                                              |  |  |  |  |  |  |  |  |  |                                                                        |  |  |  |  |  |  |  |  |  |             |          |
| Heterogeneity: Not applicable                                                                                                                                                                             |                   |                      |             |             |                      |       |                                                                                                                                                                                                                                                                                                                                                                                                                                                                                                                                                                                                                                                                                                                                                                                                                                                                                                                                                                                                                                                                                                                                                                                                                                                                                                                                                                                                                                                                                                                                                                                                                                                                                             |                    |                                      |                                      |  |          |  |  |        |                                      |                                      |      |    |       |      |    |       |                       |  |  |  |  |  |  |  |  |  |              |    |   |    |    |   |    |        |                    |  |                   |  |  |    |  |  |    |        |                    |  |                               |  |  |  |  |  |  |  |  |  |                                              |  |  |  |  |  |  |  |  |  |                        |  |  |  |  |  |  |  |  |  |              |    |   |    |    |   |    |        |                    |  |                   |  |  |    |  |  |    |        |                    |  |                               |  |  |  |  |  |  |  |  |  |                                              |  |  |  |  |  |  |  |  |  |                                                                        |  |  |  |  |  |  |  |  |  |             |          |
| Test for overall effect: Z = 1.75 (P = 0.08)                                                                                                                                                              |                   |                      |             |             |                      |       |                                                                                                                                                                                                                                                                                                                                                                                                                                                                                                                                                                                                                                                                                                                                                                                                                                                                                                                                                                                                                                                                                                                                                                                                                                                                                                                                                                                                                                                                                                                                                                                                                                                                                             |                    |                                      |                                      |  |          |  |  |        |                                      |                                      |      |    |       |      |    |       |                       |  |  |  |  |  |  |  |  |  |              |    |   |    |    |   |    |        |                    |  |                   |  |  |    |  |  |    |        |                    |  |                               |  |  |  |  |  |  |  |  |  |                                              |  |  |  |  |  |  |  |  |  |                        |  |  |  |  |  |  |  |  |  |              |    |   |    |    |   |    |        |                    |  |                   |  |  |    |  |  |    |        |                    |  |                               |  |  |  |  |  |  |  |  |  |                                              |  |  |  |  |  |  |  |  |  |                                                                        |  |  |  |  |  |  |  |  |  |             |          |
| Test for subgroup differences: Chi² = 0.38, df = 1 (P = 0.55), I² = 0%                                                                                                                                    |                   |                      |             |             |                      |       |                                                                                                                                                                                                                                                                                                                                                                                                                                                                                                                                                                                                                                                                                                                                                                                                                                                                                                                                                                                                                                                                                                                                                                                                                                                                                                                                                                                                                                                                                                                                                                                                                                                                                             |                    |                                      |                                      |  |          |  |  |        |                                      |                                      |      |    |       |      |    |       |                       |  |  |  |  |  |  |  |  |  |              |    |   |    |    |   |    |        |                    |  |                   |  |  |    |  |  |    |        |                    |  |                               |  |  |  |  |  |  |  |  |  |                                              |  |  |  |  |  |  |  |  |  |                        |  |  |  |  |  |  |  |  |  |              |    |   |    |    |   |    |        |                    |  |                   |  |  |    |  |  |    |        |                    |  |                               |  |  |  |  |  |  |  |  |  |                                              |  |  |  |  |  |  |  |  |  |                                                                        |  |  |  |  |  |  |  |  |  |             |          |

CI: Confidence interval

### Explanations

a. Patients with low FeNO levels (<20ppb) received montelukast 10 mg (28 days); patients with high FeNO levels (>30ppb) were randomised to receive prednisolone+montelukast or montelukast 10 mg (28 days). Only patients receiving montelukast were considered in the analysis, thus one arm was not randomised. Baseline characteristics were not similar between groups (higher percentage of females in low FeNO levels)

b. Very limited sample size, wide 95%CI making difficult to detect subgroup differences.

### References

- Sadeghi MH, Wright CE, Hart S, Crooks M, Morice A.. Phenotyping patients with chronic cough: evaluating the ability to predict the response to anti-inflammatory therapy.. Ann Allergy Asthma Immunol; 2018.

## Question 2: Should FeNO/blood eosinophils be used to predict treatment response to corticosteroids/anti-leukotrienes in chronic cough?

### Summary of finding table including GRADE assessment (GRADE Evidence Profile) - CORTICOSTEROIDS

| Certainty assessment                                                                                                       |                       |              |                          |                             |                      |                      | No of patients |                | Effect            |                                                | Certainty               | Importance |
|----------------------------------------------------------------------------------------------------------------------------|-----------------------|--------------|--------------------------|-----------------------------|----------------------|----------------------|----------------|----------------|-------------------|------------------------------------------------|-------------------------|------------|
| No of studies                                                                                                              | Study design          | Risk of bias | Inconsistency            | Indirectness                | Imprecision          | Other considerations | Responders     | Non-responders | Relative (95% CI) | Absolute (95% CI)                              |                         |            |
| <b>FeNO levels</b> (follow up: range 4 weeks to 24 weeks; assessed with: difference between responders and non responders) |                       |              |                          |                             |                      |                      |                |                |                   |                                                |                         |            |
| 3 <sup>1,2,3</sup>                                                                                                         | observational studies | not serious  | not serious <sup>a</sup> | very serious <sup>b,c</sup> | serious <sup>d</sup> | none                 | 113            | 86             | -                 | MD 23.31 ppb fewer (39.35 fewer to 7.27 fewer) | ⊕○○○<br><b>VERY LOW</b> | IMPORTANT  |

**CI:** Confidence interval; **MD:** Mean difference

#### Explanations

- Although the analysis shows significant variability among effect estimates one study (Prieto 2009) contributes to most of the heterogeneity. This study assessed treatment response using the most objective score (>50% reduction in daily cough symptom score)
- Studies show considerable heterogeneity in definition of 'high' versus 'low' FeNO (thresholds range from 16.3 to 38.0 ppb); ICS prescribing criteria, dose, and duration; and definition of treatment response
- Indirect measure for predictive value of FeNO
- Lower 95%CI (-7.27 ppb) probably does not allow discriminate populations and is not clinically meaningful.

#### References

- Watanabe K, Shinkai M, Shinoda M, Hara Y, Yamaguchi N, Rubin BK. Measurement of eNO with portable analyser might improve the management of persistent cough at primary care practice in Japan. Clin Respir J; 2016.
- Prieto L, Ferrer A, Ponce S, Palop J, Marin J.. Exhaled nitric oxide measurement is not useful for predicting the response to inhaled corticosteroids in subjects with chronic cough. Chest; 2009.
- Hahn PY, Morgenthaler TI, Lim KG. Use of exhaled nitric oxide in predicting response to inhaled corticosteroids for chronic cough. Mayo Clin Proc; 2007.

### Question 3: Should anti-asthmatic drugs (anti-inflammatory or bronchodilator drugs) be used to treat patients with chronic cough?

#### Summary of finding table including GRADE assessment (GRADE Evidence Profile) - LTRA

| Certainty assessment                                                                                                                                                                                                                           |                   |                           |                      |                      |                           |                      | No of patients |               | Effect                           |                                                        | Certainty               | Importance |
|------------------------------------------------------------------------------------------------------------------------------------------------------------------------------------------------------------------------------------------------|-------------------|---------------------------|----------------------|----------------------|---------------------------|----------------------|----------------|---------------|----------------------------------|--------------------------------------------------------|-------------------------|------------|
| No of studies                                                                                                                                                                                                                                  | Study design      | Risk of bias              | Inconsistency        | Indirectness         | Imprecision               | Other considerations | Placebo        | LTRA          | Relative (95% CI)                | Absolute (95% CI)                                      |                         |            |
| <b>Cough severity and frequency 'combined':</b> mean change at 2 weeks in cough score from baseline (patient completed score: 0 [no cough] - 10 [cough as bad as it has ever been <sup>1</sup> or as bad as at the first visit <sup>2</sup> ]) |                   |                           |                      |                      |                           |                      |                |               |                                  |                                                        |                         |            |
| 2 <sup>1,2</sup>                                                                                                                                                                                                                               | randomised trials | very serious <sup>a</sup> | serious <sup>b</sup> | serious <sup>c</sup> | very serious <sup>d</sup> | none                 | 16             | 27            | -                                | MD <b>3.10 lower</b><br>(6.20 lower to 0.01 higher)    | ⊕○○○<br><b>VERY LOW</b> | IMPORTANT  |
| <b>Cough frequency (number of coughs/day):</b> mean change at 1 week of daily cough frequency from baseline; assessed with: recorded objectively with an audio cough meter.                                                                    |                   |                           |                      |                      |                           |                      |                |               |                                  |                                                        |                         |            |
| 1 <sup>3</sup>                                                                                                                                                                                                                                 | randomised trials | not serious               | not serious          | not serious          | very serious <sup>d</sup> | none                 | 6              | 8             | -                                | MD <b>29.63 lower</b><br>(93.73 lower to 34.47 higher) | ⊕⊕○○<br><b>LOW</b>      | CRITICAL   |
| <b>Cough frequency (number of coughs/day):</b> mean change at 4 week of daily cough frequency from baseline; assessed with: recorded objectively with an audio cough meter.                                                                    |                   |                           |                      |                      |                           |                      |                |               |                                  |                                                        |                         |            |
| 1 <sup>3</sup>                                                                                                                                                                                                                                 | randomised trials | not serious               | not serious          | not serious          | serious <sup>e</sup>      | none                 | 6              | 8             | -                                | MD <b>144.06 lower</b><br>(219.39 to 68.73 lower)      | ⊕⊕⊕○<br><b>MODERATE</b> | CRITICAL   |
| <b>Improvement in quality of life (not further specified)</b>                                                                                                                                                                                  |                   |                           |                      |                      |                           |                      |                |               |                                  |                                                        |                         |            |
| 1 <sup>3</sup>                                                                                                                                                                                                                                 | randomised trials | not serious               | not serious          | not serious          | very serious <sup>f</sup> | none                 | 2/6<br>(33%)   | 8/8<br>(100%) | OR <b>2.64</b><br>(0.97 to 7.23) | <b>547 more per 1.000</b><br>(10 fewer to 2.077 more)  | ⊕⊕○○<br><b>LOW</b>      | IMPORTANT  |
| <b>Any adverse events:</b> (any adverse or unusual experiences) documented by patients on a diary card at each visit                                                                                                                           |                   |                           |                      |                      |                           |                      |                |               |                                  |                                                        |                         |            |
| 1 <sup>3</sup>                                                                                                                                                                                                                                 | randomised trials | not serious               | not serious          | not serious          | very serious <sup>d</sup> | none                 | 0/6<br>(0%)    | 0/8<br>(0%)   | -                                | -                                                      | ⊕⊕○○<br><b>LOW</b>      | IMPORTANT  |

**CI:** confidence interval; **CVA:** cough-variant asthma; **LTRA:** leukotriene receptor antagonist; **MD:** mean difference; **RD:** risk difference; **RR:** risk ratio.

#### Explanations

- Very high risk of selection bias and probably lack of blinding in one study.
- Confidence intervals show only minimal overlap and high I<sup>2</sup> (i.e., the proportion of the variation in point estimates due to 'among-study differences' is large).
- Regarding the population of interest, the study population also includes patients with CVA and chronic atopic cough.
- Low number of patients and 95% CI consistent with the possibility for benefit and the possibility of harm (dichotomous outcome)
- Very low number of patients
- Low number of patients and no events in both groups.



## References

1. Dicpinigaitis PV, Dobkin JB, Reichel J. Antitussive effect of the leukotriene receptor antagonist zafirlukast in subjects with cough-variant asthma. *The Journal of asthma : official journal of the Association for the Care of Asthma*. 2002;39(4):291-297.
2. Kita T, Fujimura M, Ogawa H, et al. Antitussive effects of the leukotriene receptor antagonist montelukast in patients with cough variant asthma and atopic cough. *Allergology international : official journal of the Japanese Society of Allergology*. 2010;59(2):185-192.
3. Spector SL, Tan RA. Effectiveness of montelukast in the treatment of cough variant asthma. *Annals of allergy, asthma & immunology : official publication of the American College of Allergy, Asthma, & Immunology*. 2004;93(3):232-236.

## Summary of finding table including GRADE assessment (GRADE Evidence Profile) – BRONCHODILATORS, ADULT POPULATION

| Certainty assessment                                                                                                                                                                                                                                                                                                                                                                                                       |                   |              |                      |              |                      |                      | № of patients     |                   | Effect                           |                                                      | Certainty               | Importance |
|----------------------------------------------------------------------------------------------------------------------------------------------------------------------------------------------------------------------------------------------------------------------------------------------------------------------------------------------------------------------------------------------------------------------------|-------------------|--------------|----------------------|--------------|----------------------|----------------------|-------------------|-------------------|----------------------------------|------------------------------------------------------|-------------------------|------------|
| № of studies                                                                                                                                                                                                                                                                                                                                                                                                               | Study design      | Risk of bias | Inconsistency        | Indirectness | Imprecision          | Other considerations | Placebo           | Bronchodilator    | Relative (95% CI)                | Absolute (95% CI)                                    |                         |            |
| <b>Cough severity:</b> mean cough score at 52 weeks (patient completed daily score: 0 [no cough] - 3 [severe cough], recording of the previous 24 h before visit at week 52)                                                                                                                                                                                                                                               |                   |              |                      |              |                      |                      |                   |                   |                                  |                                                      |                         |            |
| 1 <sup>1</sup>                                                                                                                                                                                                                                                                                                                                                                                                             | randomised trials | not serious  | not serious          | not serious  | serious <sup>a</sup> | none                 | 361               | 372               | -                                | MD <b>0.08 lower</b><br>(0.16 lower to 0.00 higher)  | ⊕⊕⊕○<br><b>MODERATE</b> | IMPORTANT  |
| <b>Day-time cough severity:</b> at 3 weeks; assessed with different scales. Rules of thumb exist for interpreting SMDs: 0.2 represents a small effect, 0.5 a moderate effect, and 0.8 a large effect                                                                                                                                                                                                                       |                   |              |                      |              |                      |                      |                   |                   |                                  |                                                      |                         |            |
| 2 <sup>2,3</sup>                                                                                                                                                                                                                                                                                                                                                                                                           | randomised trials | not serious  | serious <sup>b</sup> | not serious  | serious <sup>a</sup> | none                 | 43                | 43                | -                                | SMD <b>1.63 lower</b><br>(3.84 lower to 0.59 higher) | ⊕⊕○○<br><b>LOW</b>      | IMPORTANT  |
| <b>Night-time cough severity:</b> at 3 weeks; assessed with different scales. Rules of thumb exist for interpreting SMDs: 0.2 represents a small effect, 0.5 a moderate effect, and 0.8 a large effect                                                                                                                                                                                                                     |                   |              |                      |              |                      |                      |                   |                   |                                  |                                                      |                         |            |
| 2 <sup>2,3</sup>                                                                                                                                                                                                                                                                                                                                                                                                           | randomised trials | not serious  | serious <sup>b</sup> | not serious  | serious <sup>a</sup> | none                 | 43                | 43                | -                                | SMD <b>0.98 lower</b><br>(1.78 lower to 0.18 lower)  | ⊕⊕○○<br><b>LOW</b>      | IMPORTANT  |
| <b>Generic Quality of life questionnaires - St. George's Respiratory Questionnaire (SGRQ).</b> At 52 weeks. Scores range from 0 to 100, with higher scores indicating more limitations. MID: Based on empirical data and interviews with patients, a mean change score of 4 units is associated with slightly efficacious treatment, 8 units for moderately efficacious change and 12 units for very efficacious treatment |                   |              |                      |              |                      |                      |                   |                   |                                  |                                                      |                         |            |
| 1 <sup>1</sup>                                                                                                                                                                                                                                                                                                                                                                                                             | randomised trials | not serious  | not serious          | not serious  | serious <sup>a</sup> | none                 | 361               | 372               | -                                | MD <b>2.70 lower</b><br>(5.08 lower to 0.32 lower)   | ⊕⊕⊕○<br><b>MODERATE</b> | IMPORTANT  |
| <b>Night interruptions:</b> mean change from baseline                                                                                                                                                                                                                                                                                                                                                                      |                   |              |                      |              |                      |                      |                   |                   |                                  |                                                      |                         |            |
| 1 <sup>1</sup>                                                                                                                                                                                                                                                                                                                                                                                                             | randomised trials | not serious  | not serious          | not serious  | serious <sup>a</sup> | none                 | 361               | 372               | -                                | MD <b>0.07 less</b><br>(0.93 less to 0.79 more)      | ⊕⊕⊕○<br><b>MODERATE</b> | IMPORTANT  |
| <b>Skin bruises:</b> number of bruises on the volar side of the forearm with a diameter >5 cm                                                                                                                                                                                                                                                                                                                              |                   |              |                      |              |                      |                      |                   |                   |                                  |                                                      |                         |            |
| 1 <sup>1</sup>                                                                                                                                                                                                                                                                                                                                                                                                             | randomised trials | not serious  | not serious          | not serious  | serious <sup>a</sup> | none                 | 22/361<br>(6.1%)  | 20/372<br>(5.4%)  | RR <b>0.88</b><br>(0.49 to 1.59) | <b>7 Fewer per 1.000</b><br>(31 fewer to 36 more)    | ⊕⊕⊕○<br><b>MODERATE</b> | IMPORTANT  |
| <b>Any adverse events:</b> (treatment related adverse events)                                                                                                                                                                                                                                                                                                                                                              |                   |              |                      |              |                      |                      |                   |                   |                                  |                                                      |                         |            |
| 1 <sup>1</sup>                                                                                                                                                                                                                                                                                                                                                                                                             | randomised trials | not serious  | not serious          | not serious  | serious <sup>a</sup> | none                 | 49/361<br>(13.6%) | 46/372<br>(12.4%) | RR <b>0.91</b><br>(0.63 to 1.33) | <b>12 Fewer per 1.000</b><br>(50 fewer to 45 more)   | ⊕⊕⊕○<br><b>MODERATE</b> | IMPORTANT  |

CI: confidence interval; MD: mean difference; SMD: standardized mean difference; RR: risk ratio.

### Explanations

- a. 95% CI was consistent with the possibility of improving and the possibility of worsening symptoms or no effect (continuous outcome).
- b. Confidence intervals show no overlap and high  $I^2$  (i.e., the proportion of the variation in point estimates due to 'among-study differences' is large).

## References

- 4. Calverley P, Pauwels R, Vestbo J, et al. Combined salmeterol and fluticasone in the treatment of chronic obstructive pulmonary disease: a randomised controlled trial. *Lancet* (London, England). 2003;361(9356):449-456.
- 5. Ellul-Micallef R. Effect of terbutaline sulphate in chronic "allergic" cough. *British medical journal* (Clinical research ed). 1983;287(6397):940-943.
- 6. Holmes PW, Barter CE, Pierce RJ. Chronic persistent cough: use of ipratropium bromide in undiagnosed cases following upper respiratory tract infection. *Respiratory medicine*. 1992;86(5):425-29

## Summary of finding table including GRADE assessment (GRADE Evidence Profile) – BRONCHODILATORS, CHILDREN POPULATION

| Certainty assessment                                                                                                                                        |                   |              |               |              |                           |                      | № of patients   |                 | Effect                    |                                               | Certainty   | Importance |
|-------------------------------------------------------------------------------------------------------------------------------------------------------------|-------------------|--------------|---------------|--------------|---------------------------|----------------------|-----------------|-----------------|---------------------------|-----------------------------------------------|-------------|------------|
| № of studies                                                                                                                                                | Study design      | Risk of bias | Inconsistency | Indirectness | Imprecision               | Other considerations | Placebo         | Bronchodilator  | Relative (95% CI)         | Absolute (95% CI)                             |             |            |
| <b>Cough severity – parent assessment:</b> at 5-7days of treatment; assessed with VAS; Range 0 to 10 points; higher scores indicate better higher severity. |                   |              |               |              |                           |                      |                 |                 |                           |                                               |             |            |
| 1 <sup>1</sup>                                                                                                                                              | randomised trials | not serious  | not serious   | not serious  | very serious <sup>a</sup> | none                 | 22              | 21              | -                         | MD 0.4 lower<br>(1.93 lower to 1.13 higher)   | ⊕⊕○○<br>LOW | IMPORTANT  |
| <b>Cough severity – parent assessment:</b> at 5-7days of treatment; assessed with VAS; Range 0 to 10 points; higher scores indicate better higher severity. |                   |              |               |              |                           |                      |                 |                 |                           |                                               |             |            |
| 1 <sup>1</sup>                                                                                                                                              | randomised trials | not serious  | not serious   | not serious  | very serious <sup>a</sup> | none                 | 22              | 21              | -                         | MD 0.3 higher<br>(1.19 lower to 1.79 higher)  | ⊕⊕○○<br>LOW | IMPORTANT  |
| <b>Response to treatment ("treatment success")</b> defined as a ≥70% reduction in cough frequency at 5-7-days.                                              |                   |              |               |              |                           |                      |                 |                 |                           |                                               |             |            |
| 1 <sup>1</sup>                                                                                                                                              | randomised trials | not serious  | not serious   | not serious  | very serious <sup>a</sup> | none                 | 5/22<br>(22.7%) | 4/21<br>(19.0%) | RR 0.84<br>(0.26 to 2.70) | 36 Fewer per 1.000<br>(168 fewer to 386 more) | ⊕⊕○○<br>LOW | CRITICAL   |

CI: confidence interval; MD: mean difference; RR: risk ratio.

### Explanations

- Confidence intervals show no overlap and high I<sup>2</sup> (i.e., the proportion of the variation in point estimates due to 'among-study differences' is large).

### References

- Chang AB, Phelan PD, Carlin JB, Sawyer SM, Robertson CF. A randomised, placebo controlled trial of inhaled salbutamol and beclomethasone for recurrent cough. Archives of disease in childhood. 1998;79(1):6-11.

### Summary of finding table including GRADE assessment (GRADE Evidence Profile) – ICS, Adults

| Certainty assessment                                                                                                                                                                                                                                                                                        |                   |                           |                      |                      |                           |                      | № of patients     |                   | Effect                            |                                                      | Certainty               | Importance |
|-------------------------------------------------------------------------------------------------------------------------------------------------------------------------------------------------------------------------------------------------------------------------------------------------------------|-------------------|---------------------------|----------------------|----------------------|---------------------------|----------------------|-------------------|-------------------|-----------------------------------|------------------------------------------------------|-------------------------|------------|
| № of studies                                                                                                                                                                                                                                                                                                | Study design      | Risk of bias              | Inconsistency        | Indirectness         | Imprecision               | Other considerations | Placebo           | ICS               | Relative (95% CI)                 | Absolute (95% CI)                                    |                         |            |
| <b>Cough severity at 2 weeks– patient with chronic cough;</b> assessed with VAS; Range 0 to 100 points; higher scores indicate better higher severity.                                                                                                                                                      |                   |                           |                      |                      |                           |                      |                   |                   |                                   |                                                      |                         |            |
| 2 <sup>5,6</sup>                                                                                                                                                                                                                                                                                            | randomised trials | not serious               | not serious          | not serious          | serious <sup>d</sup>      | none                 | 111               | 109               | -                                 | MD <b>8.42 lower</b><br>(15.5 lower to 1.34 lower)   | ⊕⊕⊕○<br><b>MODERATE</b> | CRITICAL   |
| <b>Cough frequency at 2 weeks– patient with chronic cough;</b> assessed with patient completed score: 0 [no cough] - 4 [constant cough].                                                                                                                                                                    |                   |                           |                      |                      |                           |                      |                   |                   |                                   |                                                      |                         |            |
| 1 <sup>2</sup>                                                                                                                                                                                                                                                                                              | randomised trials | serious <sup>a</sup>      | not serious          | not serious          | serious <sup>f</sup>      | none                 | 20                | 44                | -                                 | MD <b>1 lower</b><br>(1.6 lower to 0.4 lower)        | ⊕⊕○○<br><b>LOW</b>      | CRITICAL   |
| <b>Cough severity – patient with chronic cough:</b> mean cough symptom score up to 8 weeks. Assessed with: different scales. Rules of thumb exist for interpreting SMDs: 0.2 represents a small effect, 0.5 a moderate effect, and 0.8 a large effect.                                                      |                   |                           |                      |                      |                           |                      |                   |                   |                                   |                                                      |                         |            |
| 3 <sup>1,2,3</sup>                                                                                                                                                                                                                                                                                          | randomised trials | serious <sup>a</sup>      | serious <sup>b</sup> | serious <sup>c</sup> | serious <sup>d</sup>      | none                 | 104               | 128               | -                                 | SMD <b>0.28 lower</b><br>(0.79 lower to 0.23 higher) | ⊕○○○<br><b>VERY LOW</b> | IMPORTANT  |
| <b>Cough severity – patient with chronic bronchitis:</b> mean change in daily cough score (patient completed) from baseline (at 12 weeks): 0 (none), 1 (few coughs every day), 2 (repeated cough attacks, but only in the morning or during the day), 3 (persistent cough attacks during the night and day) |                   |                           |                      |                      |                           |                      |                   |                   |                                   |                                                      |                         |            |
| 1 <sup>4</sup>                                                                                                                                                                                                                                                                                              | randomised trials | not serious               | not serious          | serious <sup>e</sup> | very serious <sup>f</sup> | none                 | 18                | 18                | -                                 | MD <b>0.03 lower</b><br>(0.68 lower to 0.63 higher)  | ⊕○○○<br><b>VERY LOW</b> | IMPORTANT  |
| <b>Night interruptions–</b> patient with chronic cough: mean change from baseline                                                                                                                                                                                                                           |                   |                           |                      |                      |                           |                      |                   |                   |                                   |                                                      |                         |            |
| 1 <sup>2</sup>                                                                                                                                                                                                                                                                                              | randomised trials | serious <sup>a</sup>      | not serious          | not serious          | very serious <sup>f</sup> | none                 | 20                | 44                | -                                 | MD <b>0.31 less</b><br>(0.81 less to 0.19 more)      | ⊕○○○<br><b>VERY LOW</b> | IMPORTANT  |
| <b>Any adverse events–</b> patient with chronic cough                                                                                                                                                                                                                                                       |                   |                           |                      |                      |                           |                      |                   |                   |                                   |                                                      |                         |            |
| 3 <sup>2,3,6</sup>                                                                                                                                                                                                                                                                                          | randomised trials | serious <sup>a</sup>      | not serious          | serious <sup>c</sup> | serious <sup>d</sup>      | none                 | 44/113<br>(38.9%) | 50/135<br>(37.0%) | RR <b>1.07</b><br>(0.83 to 1.38)  | <b>27 more per 1.000</b><br>(66 fewer to 148 more)   | ⊕○○○<br><b>VERY LOW</b> | IMPORTANT  |
| <b>Any adverse events–</b> patient with chronic bronchitis                                                                                                                                                                                                                                                  |                   |                           |                      |                      |                           |                      |                   |                   |                                   |                                                      |                         |            |
| 2 <sup>7,8</sup>                                                                                                                                                                                                                                                                                            | randomised trials | very serious <sup>g</sup> | not serious          | not serious          | very serious <sup>h</sup> | none                 | 0/44<br>(0%)      | 1/43<br>(2.3%)    | RR <b>3.40</b><br>(0.15 to 77.34) | -                                                    | ⊕○○○<br><b>VERY LOW</b> | IMPORTANT  |
| <b>Major adverse events–</b> patient with chronic cough                                                                                                                                                                                                                                                     |                   |                           |                      |                      |                           |                      |                   |                   |                                   |                                                      |                         |            |

| Certainty assessment |                   |                      |               |                      |                           |                      | No of patients |                 | Effect                    |                                              | Certainty        | Importance |
|----------------------|-------------------|----------------------|---------------|----------------------|---------------------------|----------------------|----------------|-----------------|---------------------------|----------------------------------------------|------------------|------------|
| No of studies        | Study design      | Risk of bias         | Inconsistency | Indirectness         | Imprecision               | Other considerations | Placebo        | ICS             | Relative (95% CI)         | Absolute (95% CI)                            |                  |            |
| 2 <sup>2,3</sup>     | randomised trials | serious <sup>a</sup> | not serious   | serious <sup>c</sup> | very serious <sup>h</sup> | none                 | 6/90<br>(6.7%) | 5/114<br>(4.4%) | RR 0.83<br>(0.27 to 2.60) | 11 fewer per 1.000<br>(49 fewer to 107 more) | ⊕○○○<br>VERY LOW | IMPORTANT  |

CI: confidence interval; ICS: inhaled corticosteroids; SMD: standardized mean difference; MD: mean difference; RD: risk difference; RR: risk ratio.

### Explanations

- High risk of selective reporting.
- High  $I^2$  (i.e., the proportion of the variation in point estimates due to 'among-study differences' is large,  $I^2 > 50\%$ ).
- Patients with airway symptoms suggestive of asthma, without fulfilling the functional criteria of asthma included.
- 95% CI was consistent with the possibility of improving and the possibility of worsening symptoms or no effect.
- All patients in the study were smokers with bronchitis.
- Small number of patients; 95% CI was consistent with the possibility of improving and the possibility of worsening symptoms or no effect.
- Very high risk of selection bias.
- Small number of patients and events; 95% CI was consistent with the possibility of large benefit or large harm.

### References

- Boulet LP, Milot J, Boutet M, St Georges F, Laviolette M. Airway inflammation in nonasthmatic subjects with chronic cough. *American journal of respiratory and critical care medicine*. 1994;149(2 Pt 1):482-489.
- Ribeiro M, Pereira CA, Nery LE, Beppu OS, Silva CO. High-dose inhaled beclomethasone treatment in patients with chronic cough: a randomized placebo-controlled study. *Annals of allergy, asthma & immunology : official publication of the American College of Allergy, Asthma, & Immunology*. 2007;99(1):61-68.
- Ryttilä P, Ghaly L, Varghese S, Chung W, Selroos O, Haahtela T. Treatment with inhaled steroids in patients with symptoms suggestive of asthma but with normal lung function. *The European respiratory journal*. 2008;32(4):989-996.
- Engel T, Heinig JH, Madsen O, Hansen M, Weeke ER. A trial of inhaled budesonide on airway responsiveness in smokers with chronic bronchitis. *The European respiratory journal*. 1989;2(10):935-939.
- Chaudhuri R, McMahon AD, Thomson LJ, et al. Effect of inhaled corticosteroids on symptom severity and sputum mediator levels in chronic persistent cough. *The Journal of allergy and clinical immunology*. 2004;113(6):1063-1070.
- Pizzichini MM, Pizzichini E, Parameswaran K, et al. Nonasthmatic chronic cough: No effect of treatment with an inhaled corticosteroid in patients without sputum eosinophilia. *Canadian respiratory journal*. 1999;6(4):323-330.
- Kozak-Szkopek EU, W. T. Inhalative Budesonid-Therapie bei chronischer Bronchitis. *Atemwegs- und Lungenkrankheiten*. 1997;23(9):542-546.
- Wesseling GJ, Quaadvlieg M, Wouters EF. Inhaled budesonide in chronic bronchitis. Effects on respiratory impedance. *The European respiratory journal*. 1991;4(9):1101-1105.

## Summary of finding table including GRADE assessment (GRADE Evidence Profile) – ICS, COPD POPULATION

| Certainty assessment                                                                                                                                                                                                                                                                                                                                                                                                       |                   |              |                      |              |                      |                      | № of patients      |                    | Effect                    |                                              | Certainty        | Importance |
|----------------------------------------------------------------------------------------------------------------------------------------------------------------------------------------------------------------------------------------------------------------------------------------------------------------------------------------------------------------------------------------------------------------------------|-------------------|--------------|----------------------|--------------|----------------------|----------------------|--------------------|--------------------|---------------------------|----------------------------------------------|------------------|------------|
| № of studies                                                                                                                                                                                                                                                                                                                                                                                                               | Study design      | Risk of bias | Inconsistency        | Indirectness | Imprecision          | Other considerations | Placebo            | ICS                | Relative (95% CI)         | Absolute (95% CI)                            |                  |            |
| <b>Cough severity:</b> mean cough score at 52 weeks (patient completed daily score: 0 [no cough] - 3 [severe cough], recording of the previous 24 h before visit at week 52)                                                                                                                                                                                                                                               |                   |              |                      |              |                      |                      |                    |                    |                           |                                              |                  |            |
| 1 <sup>1</sup>                                                                                                                                                                                                                                                                                                                                                                                                             | randomised trials | not serious  | not serious          | not serious  | serious <sup>a</sup> | none                 | 361                | 374                | -                         | MD 0.06 lower<br>(0.14 lower to 0.02 higher) | ⊕⊕⊕○<br>MODERATE | IMPORTANT  |
| <b>Generic Quality of life questionnaires - St. George's Respiratory Questionnaire (SGRQ).</b> At 52 weeks. Scores range from 0 to 100, with higher scores indicating more limitations. MID: Based on empirical data and interviews with patients, a mean change score of 4 units is associated with slightly efficacious treatment, 8 units for moderately efficacious change and 12 units for very efficacious treatment |                   |              |                      |              |                      |                      |                    |                    |                           |                                              |                  |            |
| 1 <sup>1</sup>                                                                                                                                                                                                                                                                                                                                                                                                             | randomised trials | not serious  | not serious          | not serious  | serious <sup>a</sup> | none                 | 361                | 374                | -                         | MD 3.50 lower<br>(5.80 lower to 1.20 lower)  | ⊕⊕⊕○<br>MODERATE | IMPORTANT  |
| <b>Night interruptions:</b> mean change from baseline                                                                                                                                                                                                                                                                                                                                                                      |                   |              |                      |              |                      |                      |                    |                    |                           |                                              |                  |            |
| 1 <sup>1</sup>                                                                                                                                                                                                                                                                                                                                                                                                             | randomised trials | not serious  | not serious          | not serious  | serious <sup>a</sup> | none                 | 361                | 374                | -                         | MD 0.56 less<br>(1.35 less to 0.23 more)     | ⊕⊕⊕○<br>MODERATE | IMPORTANT  |
| <b>Skin bruises:</b> number of bruises on the volar side of the forearm with a diameter >5 cm                                                                                                                                                                                                                                                                                                                              |                   |              |                      |              |                      |                      |                    |                    |                           |                                              |                  |            |
| 1 <sup>1</sup>                                                                                                                                                                                                                                                                                                                                                                                                             | randomised trials | not serious  | not serious          | not serious  | serious <sup>a</sup> | none                 | 22/361<br>(6.1%)   | 26/374<br>(7.0%)   | RR 1.14<br>(0.66 to 1.98) | 9 more per 1.000<br>(21 fewer to 60 more)    | ⊕⊕⊕○<br>MODERATE | IMPORTANT  |
| <b>Response to treatment ('treatment success'):</b> at 24 weeks; defined as: no cough symptoms                                                                                                                                                                                                                                                                                                                             |                   |              |                      |              |                      |                      |                    |                    |                           |                                              |                  |            |
| 1 <sup>2</sup>                                                                                                                                                                                                                                                                                                                                                                                                             | randomised trials | not serious  | not serious          | not serious  | serious <sup>a</sup> | none                 | 11/139<br>(7.9%)   | 26/142<br>(18.3%)  | RR 2.31<br>(1.19 to 4.50) | 104 more per 1.000<br>(15 to 277 more)       | ⊕⊕⊕○<br>MODERATE | IMPORTANT  |
| <b>Exacerbations:</b> number of patients with exacerbations up to 52 weeks.                                                                                                                                                                                                                                                                                                                                                |                   |              |                      |              |                      |                      |                    |                    |                           |                                              |                  |            |
| 2 <sup>1,2</sup>                                                                                                                                                                                                                                                                                                                                                                                                           | randomised trials | not serious  | not serious          | not serious  | serious <sup>a</sup> | none                 | 70/500<br>(14.0%)  | 55/516<br>(10.7%)  | RR 0.74<br>(0.46 to 1.20) | 36 fewer per 1.000<br>(76 fewer to 28 more)  | ⊕⊕⊕○<br>MODERATE | IMPORTANT  |
| <b>Any adverse events:</b> up to 52 weeks                                                                                                                                                                                                                                                                                                                                                                                  |                   |              |                      |              |                      |                      |                    |                    |                           |                                              |                  |            |
| 2 <sup>1,2</sup>                                                                                                                                                                                                                                                                                                                                                                                                           | randomised trials | not serious  | serious <sup>b</sup> | not serious  | serious <sup>a</sup> | none                 | 144/500<br>(28.8%) | 161/516<br>(31.2%) | RR 1.11<br>(0.73 to 1.68) | 32 more per 1.000<br>(78 fewer to 196 more)  | ⊕⊕○○<br>LOW      | IMPORTANT  |

CI: confidence interval; MD: mean difference; RR: risk ratio.

### Explanations

- 95% CI was consistent with the possibility of improving and the possibility of worsening symptoms or no effect (continuous outcome).
- confidence intervals show only minimal overlap and high I<sup>2</sup> (i.e., the proportion of the variation in point estimates due to 'among-study differences' is large,

$I^2 > 50\%$ ).

## References

7. Calverley P, Pauwels R, Vestbo J, et al. Combined salmeterol and fluticasone in the treatment of chronic obstructive pulmonary disease: a randomised controlled trial. *Lancet* (London, England). 2003;361(9356):449-456.
8. Paggiaro PL, Dahle R, Bakran I, Frith L, Hollingworth K, Efthimiou J. Multicentre randomised placebo- controlled trial of inhaled fluticasone propionate in patients with chronic obstructive pulmonary disease. International COPD Study Group. *Lancet* (London, England). 1998;351(9105):773-780.



## Summary of finding table including GRADE assessment (GRADE Evidence Profile) – BRONCHODILATORS +ICS

| Certainty assessment                                                                                                                                                                                                                                                                                                                                                                                                       |                   |              |               |                      |                      |                      | № of patients     |                      | Effect                           |                                                     | Certainty               | Importance |
|----------------------------------------------------------------------------------------------------------------------------------------------------------------------------------------------------------------------------------------------------------------------------------------------------------------------------------------------------------------------------------------------------------------------------|-------------------|--------------|---------------|----------------------|----------------------|----------------------|-------------------|----------------------|----------------------------------|-----------------------------------------------------|-------------------------|------------|
| № of studies                                                                                                                                                                                                                                                                                                                                                                                                               | Study design      | Risk of bias | Inconsistency | Indirectness         | Imprecision          | Other considerations | Placebo           | Bronchodilators +ICS | Relative (95% CI)                | Absolute (95% CI)                                   |                         |            |
| <b>Cough severity:</b> mean cough score at 52 weeks (patient completed daily score: 0 [no cough] - 3 [severe cough], recording of the previous 24 h before visit at week 52)                                                                                                                                                                                                                                               |                   |              |               |                      |                      |                      |                   |                      |                                  |                                                     |                         |            |
| 1 <sup>1</sup>                                                                                                                                                                                                                                                                                                                                                                                                             | randomised trials | not serious  | not serious   | serious <sup>a</sup> | serious <sup>b</sup> | none                 | 361               | 358                  | -                                | MD <b>0.09 lower</b><br>(0.17 lower to 0.01 lower)  | ⊕⊕⊕○<br><b>MODERATE</b> | IMPORTANT  |
| <b>Generic Quality of life questionnaires - St. George's Respiratory Questionnaire (SGRQ).</b> At 52 weeks. Scores range from 0 to 100, with higher scores indicating more limitations. MID: Based on empirical data and interviews with patients, a mean change score of 4 units is associated with slightly efficacious treatment, 8 units for moderately efficacious change and 12 units for very efficacious treatment |                   |              |               |                      |                      |                      |                   |                      |                                  |                                                     |                         |            |
| 1 <sup>1</sup>                                                                                                                                                                                                                                                                                                                                                                                                             | randomised trials | not serious  | not serious   | not serious          | serious <sup>a</sup> | none                 | 361               | 358                  | -                                | MD <b>2.20 lower</b><br>(4.55 lower to 0.15 higher) | ⊕⊕⊕○<br><b>MODERATE</b> | IMPORTANT  |
| <b>Night interruptions:</b> mean change from baseline                                                                                                                                                                                                                                                                                                                                                                      |                   |              |               |                      |                      |                      |                   |                      |                                  |                                                     |                         |            |
| 1 <sup>1</sup>                                                                                                                                                                                                                                                                                                                                                                                                             | randomised trials | not serious  | not serious   | not serious          | serious <sup>a</sup> | none                 | 361               | 358                  | -                                | MD <b>0.00 less</b><br>(0.8 less to 0.8 more)       | ⊕⊕⊕○<br><b>MODERATE</b> | IMPORTANT  |
| <b>Skin bruises:</b> number of bruises on the volar side of the forearm with a diameter >5 cm                                                                                                                                                                                                                                                                                                                              |                   |              |               |                      |                      |                      |                   |                      |                                  |                                                     |                         |            |
| 1 <sup>1</sup>                                                                                                                                                                                                                                                                                                                                                                                                             | randomised trials | not serious  | not serious   | not serious          | serious <sup>a</sup> | none                 | 22/361<br>(6.1%)  | 29/358<br>(8.1%)     | RR <b>1.33</b><br>(0.78 to 2.27) | <b>20 more per 1.000</b><br>(13 fewer to 77 more)   | ⊕⊕⊕○<br><b>MODERATE</b> | IMPORTANT  |
| <b>Any adverse events:</b> (treatment related adverse events)                                                                                                                                                                                                                                                                                                                                                              |                   |              |               |                      |                      |                      |                   |                      |                                  |                                                     |                         |            |
| 1 <sup>1</sup>                                                                                                                                                                                                                                                                                                                                                                                                             | randomised trials | not serious  | not serious   | not serious          | serious <sup>a</sup> | none                 | 49/361<br>(13.6%) | 58/358<br>(16.2%)    | RR <b>0.48</b><br>(0.22 to 1.04) | <b>27 Fewer per 1.000</b><br>(41 fewer to 2 more)   | ⊕⊕⊕○<br><b>MODERATE</b> | IMPORTANT  |

**CI:** confidence interval; **MD:** mean difference; **SMD:** standardized mean difference; **RR:** risk ratio.

### Explanations

- Duration of intervention was
- 95% CI was consistent with the possibility of improving and the possibility of worsening symptoms or no effect (continuous outcome).

### References

- Calverley P, Pauwels R, Vestbo J, et al. Combined salmeterol and fluticasone in the treatment of chronic obstructive pulmonary disease: a randomised controlled trial. *Lancet* (London, England). 2003;361(9356):449-456.

# Summary of finding table including GRADE assessment (GRADE Evidence Profile) – ICS, Children

| Certainty assessment                                                                                                     |                   |                      |               |              |                             |                      | № of patients    |               | Effect                           |                                                            | Certainty        | Importance |
|--------------------------------------------------------------------------------------------------------------------------|-------------------|----------------------|---------------|--------------|-----------------------------|----------------------|------------------|---------------|----------------------------------|------------------------------------------------------------|------------------|------------|
| № of studies                                                                                                             | Study design      | Risk of bias         | Inconsistency | Indirectness | Imprecision                 | Other considerations | ICS              | Placebo       | Relative (95% CI)                | Absolute (95% CI)                                          |                  |            |
| Nocturnal cough frequency: mean change from baseline (objectively recorded) - At nights 15/16                            |                   |                      |               |              |                             |                      |                  |               |                                  |                                                            |                  |            |
| 1 <sup>1</sup>                                                                                                           | randomised trials | serious <sup>a</sup> | not serious   | not serious  | serious <sup>b</sup>        | none                 | 26               | 24            | -                                | MD <b>60 lower</b><br>(85.45 lower to 34.55 lower)         | ⊕⊕○○<br>LOW      |            |
| Cough severity: mean change from baseline (VAS score averaged over 1 week, at 4-5 weeks) - Parent completed              |                   |                      |               |              |                             |                      |                  |               |                                  |                                                            |                  |            |
| 1 <sup>2</sup>                                                                                                           | randomised trials | serious <sup>a</sup> | not serious   | not serious  | serious <sup>c</sup>        | none                 | 22               | 21            | -                                | MD <b>0.6 higher</b><br>(0.6 lower to 1.8 higher)          | ⊕⊕○○<br>LOW      |            |
| Cough severity: mean change from baseline (VAS score averaged over 1 week, at 4-5 weeks) - Child completed               |                   |                      |               |              |                             |                      |                  |               |                                  |                                                            |                  |            |
| 1 <sup>2</sup>                                                                                                           | randomised trials | serious <sup>a</sup> | not serious   | not serious  | serious <sup>c</sup>        | none                 | 22               | 21            | -                                | MD <b>0.6 higher</b><br>(0.53 lower to 1.73 higher)        | ⊕⊕○○<br>LOW      |            |
| Response to treatment ('treatment succes') - Defined as a ≥75% reduction in nocturnal cough frequencys (at nights 15/16) |                   |                      |               |              |                             |                      |                  |               |                                  |                                                            |                  |            |
| 1 <sup>1</sup>                                                                                                           | randomised trials | serious <sup>a</sup> | not serious   | not serious  | serious <sup>d</sup>        | none                 | 17/26<br>(65.4%) | 8/24 (33.3%)  | RR <b>1.96</b><br>(1.04 to 3.69) | <b>320 more per 1,000</b><br>(from 13 more to 897 more)    | ⊕⊕○○<br>LOW      |            |
| Response to treatment ('treatment succes') - Defined as a ≥70% reduction in 24 h cough frequency (at 4/5 weeks)          |                   |                      |               |              |                             |                      |                  |               |                                  |                                                            |                  |            |
| 1 <sup>2</sup>                                                                                                           | randomised trials | serious <sup>a</sup> | not serious   | not serious  | very serious <sup>d,e</sup> | none                 | 12/22<br>(54.5%) | 14/21 (66.7%) | RR <b>0.82</b><br>(0.50 to 1.33) | <b>120 fewer per 1,000</b><br>(from 333 fewer to 220 more) | ⊕○○○<br>VERY LOW |            |

CI: Confidence interval; MD: Mean difference; RR: Risk ratio

## Explanations

- a. Potential risk of carry-over effect, uncertainties in missing data and randomisation.
- b. 95% CI was consistent with the possibility of improving and the possibility of no effect.
- c. 95% CI was consistent with the possibility of worsening symptoms or no effect.

d. Low number of events and patients included

e. 95%CI was consistent with appreciable benefit or harm

## References

1. Davies MJ, Fuller P, Picciotto A, McKenzie SA. Persistent nocturnal cough: randomised controlled trial of high dose inhaled corticosteroid. *Arch Dis Child*. 1999 Jul;81(1):38-44.
2. Chang AB, Phelan PD, Carlin JB, Sawyer SM, Robertson CF. A randomised, placebo controlled trial of inhaled salbutamol and beclomethasone for recurrent cough. *Arch Dis Child*. 1998 Jul;79(1):6-11.

#### Question 4: Should anti-acid drugs (PPIs and H2 antagonists) be used to treat patients with chronic cough?

##### Summary of finding table including GRADE assessment (GRADE Evidence Profile) - Adults

| Certainty assessment                                                                                                                                                                 |                   |                      |                      |                      |                      |                      | № of patients                                                                                                                                                                                                                                                                                                                                                       |         | Effect            |                                                       | Certainty               | Importance |
|--------------------------------------------------------------------------------------------------------------------------------------------------------------------------------------|-------------------|----------------------|----------------------|----------------------|----------------------|----------------------|---------------------------------------------------------------------------------------------------------------------------------------------------------------------------------------------------------------------------------------------------------------------------------------------------------------------------------------------------------------------|---------|-------------------|-------------------------------------------------------|-------------------------|------------|
| № of studies                                                                                                                                                                         | Study design      | Risk of bias         | Inconsistency        | Indirectness         | Imprecision          | Other considerations | Acid suppression therapy                                                                                                                                                                                                                                                                                                                                            | Placebo | Relative (95% CI) | Absolute (95% CI)                                     |                         |            |
| Cough severity (different scales). Rules of thumb exist for interpreting SMDs: 0.2 represents a small effect, 0.5 a moderate effect, and 0.8 a large effect                          |                   |                      |                      |                      |                      |                      |                                                                                                                                                                                                                                                                                                                                                                     |         |                   |                                                       |                         |            |
| 4 <sup>1,2,3,4</sup>                                                                                                                                                                 | randomised trials | serious <sup>a</sup> | serious <sup>b</sup> | not serious          | serious <sup>c</sup> | none                 | 74                                                                                                                                                                                                                                                                                                                                                                  | 63      | -                 | SMD <b>0.63 lower</b><br>(1.37 lower to 0.1 higher)   | ⊕○○○<br><b>VERY LOW</b> | IMPORTANT  |
| Cough frequency (different scales). Rules of thumb exist for interpreting SMDs: 0.2 represents a small effect, 0.5 a moderate effect, and 0.8 a large effect                         |                   |                      |                      |                      |                      |                      |                                                                                                                                                                                                                                                                                                                                                                     |         |                   |                                                       |                         |            |
| 2 <sup>2,3</sup>                                                                                                                                                                     | randomised trials | serious <sup>d</sup> | not serious          | not serious          | serious <sup>c</sup> | none                 | 46                                                                                                                                                                                                                                                                                                                                                                  | 43      | -                 | SMD <b>0.18 lower</b><br>(0.6 lower to 0.23 higher)   | ⊕⊕○○<br><b>LOW</b>      | IMPORTANT  |
| Quality of life specific questionnaires (different scales). Rules of thumb exist for interpreting SMDs: 0.2 represents a small effect, 0.5 a moderate effect, and 0.8 a large effect |                   |                      |                      |                      |                      |                      |                                                                                                                                                                                                                                                                                                                                                                     |         |                   |                                                       |                         |            |
| 3 <sup>2,3,4</sup>                                                                                                                                                                   | randomised trials | serious <sup>e</sup> | not serious          | not serious          | serious <sup>c</sup> | none                 | 65                                                                                                                                                                                                                                                                                                                                                                  | 51      | -                 | SMD <b>0.72 SD lower</b><br>(1.3 lower to 0.13 lower) | ⊕⊕○○<br><b>LOW</b>      | CRITICAL   |
| Tussive response to cough challenge. Assessed with: Citric acid cough challenge                                                                                                      |                   |                      |                      |                      |                      |                      |                                                                                                                                                                                                                                                                                                                                                                     |         |                   |                                                       |                         |            |
| 1 <sup>2</sup>                                                                                                                                                                       | randomised trials | not serious          | not serious          | Serious <sup>f</sup> | serious <sup>g</sup> | none                 | There were no differences between treatment and placebo groups in the change from baseline concentration on inhaled citric acid (to trigger cough). Log C2; between-group p value 0.66 Log C5; between-group p value 0.57.                                                                                                                                          |         |                   |                                                       | ⊕⊕○○<br><b>LOW</b>      | IMPORTANT  |
| Adverse events                                                                                                                                                                       |                   |                      |                      |                      |                      |                      |                                                                                                                                                                                                                                                                                                                                                                     |         |                   |                                                       |                         |            |
| 3 <sup>2,3,4</sup>                                                                                                                                                                   | randomised trials | serious <sup>e</sup> | not serious          | not serious          | serious <sup>h</sup> | none                 | 3 RCTs reported few adverse events with a similar incidence between intervention and placebo group. Faruqi: treatment 4/24 (17%) versus placebo 2/25 (8%) respiratory tract infection; Shaheen: no serious events/withdrawns in both groups; Park: treatment 2/19 (11%, both from high-dose group) urticaria versus placebo 2/8 (25%) 1 urticaria and 1 palpitation |         |                   |                                                       | ⊕⊕○○<br><b>LOW</b>      | IMPORTANT  |

**CI:** Confidence interval; **SMD:** Standardised mean difference

### Explanations

- a. 3 studies: non-validated subjective outcome measures; 1 study (Kiljander) no description on the number of dropouts according to treatment group or period; 1 study (Park): high drop-out rate (30%); 1 study (Park): significant different baseline characteristics and different dropout rates between groups
- b. Heterogeneity:  $\text{Tau}^2 = 0.41$ ;  $\text{Chi}^2 = 11.70$ ,  $\text{df} = 3$  ( $P = 0.008$ );  $I^2 = 74\%$
- c.  $\text{SMD} > 0.5$  and  $< 0.8$  representing a moderate difference
- d. All studies: non-validated subjective outcome measures
- e. 1 study (Park): high drop-out rate (30%); 1 study (Park): significant different baseline characteristics and different dropout rates between groups
- f. Indirect (surrogate) measure of efficacy
- g. single study with small sample size
- h. Low number of patients and events

### References

1. Kiljander TO1, Salomaa ER, Hietanen EK, Terho EO. Chronic cough and gastro-oesophageal reflux: a double-blind placebo-controlled study with omeprazole. *Eur Respir J*. 2000 Oct;16(4):633-8.
2. Faruqi S, Molyneux ID, Fathi H, Wright C, Thompson R, Morice AH. Chronic cough and esomeprazole: a double-blind placebo-controlled parallel study. *Respirology*. 2011 Oct;16(7):1150-6.
3. Shaheen NJ, Crockett SD, Bright SD, Madanick RD, Buckmire R, Couch M, Dellon ES, Galanko JA, Sharpless G, Morgan DR, Spacek MB, Heidt-Davis P, Henke D. Randomised clinical trial: high-dose acid suppression for chronic cough - a double-blind, placebo-controlled study. *Aliment Pharmacol Ther*. 2011 Jan;33(2):225-34.
4. Park HJ, Park YM, Kim JH, Lee HS, Kim HJ, Ahn CM, Byun MK. Effectiveness of proton pump inhibitor in unexplained chronic cough. *PLoS One*. 2017 Oct 10;12(10):e0185397

## Summary of finding table including GRADE assessment (GRADE Evidence Profile) - Children

| Certainty assessment                                       |                   |                      |               |              |                           |                      | № of patients                                                             |         | Effect            |                                                    | Certainty               | Importance |
|------------------------------------------------------------|-------------------|----------------------|---------------|--------------|---------------------------|----------------------|---------------------------------------------------------------------------|---------|-------------------|----------------------------------------------------|-------------------------|------------|
| № of studies                                               | Study design      | Risk of bias         | Inconsistency | Indirectness | Imprecision               | Other considerations | Acid suppression therapy                                                  | Placebo | Relative (95% CI) | Absolute (95% CI)                                  |                         |            |
| Daytime cough frequency. Assessed with : episodes/day      |                   |                      |               |              |                           |                      |                                                                           |         |                   |                                                    |                         |            |
| 1 <sup>1</sup>                                             | randomised trials | serious <sup>a</sup> | not serious   | not serious  | Very serious <sup>b</sup> | none                 | 4                                                                         | 4       | -                 | MD <b>2.70 fewer</b><br>(3.85 fewer to 1.55 fewer) | ⊕○○○<br><b>VERY LOW</b> | CRITICAL   |
| Night-time cough frequency. Assessed with : episodes/night |                   |                      |               |              |                           |                      |                                                                           |         |                   |                                                    |                         |            |
| 1 <sup>1</sup>                                             | randomised trials | serious <sup>a</sup> | not serious   | not serious  | Very serious <sup>b</sup> | none                 | 4                                                                         | 4       | -                 | MD <b>0.20 fewer</b><br>(0.56 fewer to 0.16 more)  | ⊕○○○<br><b>VERY LOW</b> | CRITICAL   |
| Adverse event                                              |                   |                      |               |              |                           |                      |                                                                           |         |                   |                                                    |                         |            |
| 1                                                          | randomised trials | serious <sup>a</sup> | not serious   | not serious  | Very serious <sup>b</sup> | none                 | No adverse events reported by parents in both treatment and placebo group |         |                   |                                                    | ⊕○○○<br><b>VERY LOW</b> | IMPORTANT  |

**CI:** Confidence interval

### Explanations

a. non-validated subjective outcome measures; observer bias; unknown number of dropouts in treatment group

b. small groups (n=4)

### References

1. Adamko DJ, Majaesic CM, Skappak C, Jones AB. A pilot trial on the treatment of gastroesophageal reflux-related cough in infants. Transl Pediatr. 2012 Jul;1(1):23-34.

### Summary of finding table including GRADE assessment (GRADE Evidence Profile)

| Certainty assessment                                                                                                                                                                                                                                                                                                                                                                                   |                   |              |                          |                      |                      |                      | № of patients                                              |         | Effect            |                                                       | Certainty               | Importance |
|--------------------------------------------------------------------------------------------------------------------------------------------------------------------------------------------------------------------------------------------------------------------------------------------------------------------------------------------------------------------------------------------------------|-------------------|--------------|--------------------------|----------------------|----------------------|----------------------|------------------------------------------------------------|---------|-------------------|-------------------------------------------------------|-------------------------|------------|
| № of studies                                                                                                                                                                                                                                                                                                                                                                                           | Study design      | Risk of bias | Inconsistency            | Indirectness         | Imprecision          | Other considerations | Macrolides                                                 | Placebo | Relative (95% CI) | Absolute (95% CI)                                     |                         |            |
| Quality of life specific questionnaires – LCQ (Leicester Cough Questionnaire). Range 3 to 21 points; higher scores indicate better quality of life. MID is estimated to be 1.3 points                                                                                                                                                                                                                  |                   |              |                          |                      |                      |                      |                                                            |         |                   |                                                       |                         |            |
| 3 <sup>1,2,3</sup>                                                                                                                                                                                                                                                                                                                                                                                     | randomised trials | not serious  | not serious              | serious <sup>a</sup> | serious <sup>b</sup> | none                 | 74                                                         | 77      | -                 | MD <b>1.27 higher</b><br>(2.09 higher to 0.45 higher) | ⊕⊕○○<br><b>LOW</b>      | CRITICAL   |
| Cough severity (VAS or severity score). Rules of thumb exist for interpreting SMDs: 0.2 represents a small effect, 0.5 a moderate effect, and 0.8 a large effect                                                                                                                                                                                                                                       |                   |              |                          |                      |                      |                      |                                                            |         |                   |                                                       |                         |            |
| 2 <sup>1,3</sup>                                                                                                                                                                                                                                                                                                                                                                                       | randomised trials | not serious  | not serious              | not serious          | serious <sup>b</sup> | none                 | 36                                                         | 36      | -                 | SMD <b>0.42 lower</b><br>(0.89 lower to 0.05 higher)  | ⊕⊕⊕○<br><b>MODERATE</b> | CRITICAL   |
| Cough frequency at 12 weeks (number of coughs/24h)                                                                                                                                                                                                                                                                                                                                                     |                   |              |                          |                      |                      |                      |                                                            |         |                   |                                                       |                         |            |
| 1 <sup>1</sup>                                                                                                                                                                                                                                                                                                                                                                                         | randomised trials | not serious  | not serious <sup>c</sup> | not serious          | serious <sup>d</sup> | none                 | Mean difference in fold change 1.1 (95% CI 0.7 to 1.5)     |         |                   | ⊕⊕⊕○<br><b>MODERATE</b>                               | CRITICAL                |            |
| Capsaicin C2 at 12 weeks                                                                                                                                                                                                                                                                                                                                                                               |                   |              |                          |                      |                      |                      |                                                            |         |                   |                                                       |                         |            |
| 1                                                                                                                                                                                                                                                                                                                                                                                                      | randomised trials | not serious  | not serious <sup>d</sup> | serious <sup>e</sup> | serious <sup>d</sup> | none                 | Mean difference in fold change 0.7 (95% CI 0.4 to 1.3)     |         |                   | ⊕⊕○○<br><b>LOW</b>                                    | IMPORTANT               |            |
| Capsaicin C5 at 12 weeks                                                                                                                                                                                                                                                                                                                                                                               |                   |              |                          |                      |                      |                      |                                                            |         |                   |                                                       |                         |            |
| 1                                                                                                                                                                                                                                                                                                                                                                                                      | randomised trials | not serious  | not serious <sup>d</sup> | serious <sup>e</sup> | serious <sup>d</sup> | none                 | Mean difference in fold change 1.3 (95% CI 0.9 to 2.0)     |         |                   | ⊕⊕○○<br><b>LOW</b>                                    | IMPORTANT               |            |
| Generic Quality of life questionnaires - St. George's Respiratory Questionnaire (SGRQ). Scores range from 0 to 100, with higher scores indicating more limitations. MID: Based on empirical data and interviews with patients, a mean change score of 4 units is associated with slightly efficacious treatment, 8 units for moderately efficacious change and 12 units for very efficacious treatment |                   |              |                          |                      |                      |                      |                                                            |         |                   |                                                       |                         |            |
| 1                                                                                                                                                                                                                                                                                                                                                                                                      | randomised trials | not serious  | not serious <sup>d</sup> | serious <sup>a</sup> | serious <sup>b</sup> | none                 | Mean difference in fold change -7.5 (95% CI -12.5 to -2.5) |         |                   | ⊕⊕○○<br><b>LOW</b>                                    | IMPORTANT               |            |
| Adverse events - Gastrointestinal                                                                                                                                                                                                                                                                                                                                                                      |                   |              |                          |                      |                      |                      |                                                            |         |                   |                                                       |                         |            |

| Certainty assessment                    |                   |              |                          |              |                           |                      | № of patients |               | Effect                            |                                                            | Certainty          | Importance |
|-----------------------------------------|-------------------|--------------|--------------------------|--------------|---------------------------|----------------------|---------------|---------------|-----------------------------------|------------------------------------------------------------|--------------------|------------|
| № of studies                            | Study design      | Risk of bias | Inconsistency            | Indirectness | Imprecision               | Other considerations | Macrolides    | Placebo       | Relative (95% CI)                 | Absolute (95% CI)                                          |                    |            |
| 2 <sup>2,3</sup>                        | randomised trials | not serious  | serious <sup>f</sup>     | not serious  | serious <sup>g</sup>      | none                 | 13/58 (22.4%) | 11/58 (19.0%) | <b>OR 1.24</b><br>(0.50 to 3.09)  | <b>35 more per 1,000</b><br>(from 85 fewer to 230 more)    | ⊕⊕○○<br><b>LOW</b> | IMPORTANT  |
| <b>Adverse events - Respiratory</b>     |                   |              |                          |              |                           |                      |               |               |                                   |                                                            |                    |            |
| 2 <sup>2,3</sup>                        | randomised trials | not serious  | not serious              | not serious  | serious <sup>g</sup>      | none                 | 8/58 (13.8%)  | 13/58 (22.4%) | <b>OR 0.56</b><br>(0.21 to 1.46)  | <b>85 fewer per 1,000</b><br>(from 73 more to 167 fewer)   | ⊕⊕○○<br><b>LOW</b> | IMPORTANT  |
| <b>Adverse events - CNS</b>             |                   |              |                          |              |                           |                      |               |               |                                   |                                                            |                    |            |
| 1 <sup>3</sup>                          | randomised trials | not serious  | not serious <sup>c</sup> | not serious  | very serious <sup>d</sup> | none                 | 1/21 (4.8%)   | 0/21 (0.0%)   | <b>OR 3.15</b><br>(0.12 to 81.74) | -                                                          | ⊕⊕○○<br><b>LOW</b> | IMPORTANT  |
| <b>Adverse events - Musculoskeletal</b> |                   |              |                          |              |                           |                      |               |               |                                   |                                                            |                    |            |
| 1 <sup>3</sup>                          | randomised trials | not serious  | not serious <sup>c</sup> | not serious  | very serious <sup>d</sup> | none                 | 0/21 (0.0%)   | 3/21 (14.3%)  | <b>OR 0.12</b><br>(0.01 to 2.54)  | <b>123 fewer per 1,000</b><br>(from 141 fewer to 155 more) | ⊕⊕○○<br><b>LOW</b> | IMPORTANT  |
| <b>Adverse events - Cardiovascular</b>  |                   |              |                          |              |                           |                      |               |               |                                   |                                                            |                    |            |
| 1 <sup>2,3</sup>                        | randomised trials | not serious  | not serious <sup>c</sup> | not serious  | very serious <sup>d</sup> | none                 | 2/37 (5.4%)   | 1/37 (2.7%)   | <b>OR 2.06</b><br>(0.18 to 23.72) | <b>27 more per 1,000</b><br>(from 22 fewer to 370 more)    | ⊕⊕○○<br><b>LOW</b> | IMPORTANT  |

**CI:** Confidence interval; **MD:** Mean difference; **SMD:** Standardised mean difference; **OR:** Odds ratio

### Explanations

- Largest study includes patients with COPD and chronic cough
- Low number of patients included. 95%CI includes a clinically important / large benefit and meaningless difference.
- Single study
- Small study, probably not powered to detect differences.
- Indirect measure of efficacy
- Variability (heterogeneity) among effects estimates
- Very low number of events, 95%CI indicates large benefit or harm.

### References

- Yousaf, N., et al. (2010). "Long-term low-dose erythromycin in patients with unexplained chronic cough: a double-blind placebo controlled trial." Thorax65(12): 1107-1110
- Berkhof, F., et al. (2013) Azithromycin and cough-specific health status in patients with chronic obstructive pulmonary disease and chronic cough: a randomised controlled trial. Respir Res14, 125 DOI: 10.1186/1465-9921-14-125
- Hodgson, D., et al. (2016). "The Effects of Azithromycin in Treatment-Resistant Cough: A Randomized, Double-Blind, Placebo-Controlled Trial." Chest149(4): 1052-1060



**Question 6: Which cough neuromodulatory agents (pregabalin, gabapentin, tricyclics, and opiates) should be used to treat patients with chronic cough?**

**Summary of finding table including GRADE assessment (GRADE Evidence Profile) - OPIATES**

| Certainty assessment                                                                                                                                                                                      |                   |              |                          |                      |                           |                      | № of patients                        |         | Effect            |                                                | Certainty        | Importance |
|-----------------------------------------------------------------------------------------------------------------------------------------------------------------------------------------------------------|-------------------|--------------|--------------------------|----------------------|---------------------------|----------------------|--------------------------------------|---------|-------------------|------------------------------------------------|------------------|------------|
| № of studies                                                                                                                                                                                              | Study design      | Risk of bias | Inconsistency            | Indirectness         | Imprecision               | Other considerations | Opioids                              | Placebo | Relative (95% CI) | Absolute (95% CI)                              |                  |            |
| Quality of life specific questionnaires – LCQ (Leicester Cough Questionnaire). Follow-up: 4 weeks. Range 3 to 21 points; higher scores indicate better quality of life. MID is estimated to be 1.3 points |                   |              |                          |                      |                           |                      |                                      |         |                   |                                                |                  |            |
| 1 <sup>1</sup>                                                                                                                                                                                            | randomised trials | not serious  | not serious <sup>a</sup> | not serious          | serious <sup>b</sup>      | none                 | 27                                   | 27      | -                 | MD 2 higher<br>(3.07 higher to 0.93 higher)    | ⊕⊕⊕○<br>MODERATE | CRITICAL   |
| Cough severity score. Follow-up: 4 weeks. Range 0 to 9 points; higher scores indicate more severity; assessed with: Diary                                                                                 |                   |              |                          |                      |                           |                      |                                      |         |                   |                                                |                  |            |
| 1 <sup>1</sup>                                                                                                                                                                                            | randomised trials | not serious  | not serious <sup>a</sup> | not serious          | serious <sup>c</sup>      | none                 | 27                                   | 27      | -                 | MD 1.6 lower<br>(2.11 lower to 1.09 lower)     | ⊕⊕⊕○<br>MODERATE | IMPORTANT  |
| Tussive response to cough challenge. Follow up: 4 weeks; assessed with: Citric acid cough challenge.                                                                                                      |                   |              |                          |                      |                           |                      |                                      |         |                   |                                                |                  |            |
| 1 <sup>1</sup>                                                                                                                                                                                            | randomised trials | not serious  | not serious <sup>a</sup> | serious <sup>d</sup> | not serious               | none                 | 27                                   | 27      | -                 | MD 93 higher<br>(27.88 lower to 213.88 higher) | ⊕⊕⊕○<br>MODERATE | IMPORTANT  |
| Adverse event - constipation                                                                                                                                                                              |                   |              |                          |                      |                           |                      |                                      |         |                   |                                                |                  |            |
| 1 <sup>1</sup>                                                                                                                                                                                            | randomised trials | not serious  | not serious <sup>a</sup> | not serious          | very serious <sup>e</sup> | none                 | 40% in treatment group (11 patients) |         |                   |                                                | ⊕⊕○○<br>LOW      | CRITICAL   |
| Adverse event – drowsiness                                                                                                                                                                                |                   |              |                          |                      |                           |                      |                                      |         |                   |                                                |                  |            |
| 1 <sup>1</sup>                                                                                                                                                                                            | randomised trials | not serious  | not serious <sup>a</sup> | not serious          | very serious <sup>e</sup> | none                 | 25% in treatment group (7 patients)  |         |                   |                                                | ⊕⊕○○<br>LOW      | CRITICAL   |

**CI:** Confidence interval; **MD:** Mean difference

**Explanations**

- Single study
- Low number of patients included. 95%CI includes a clinically important / large benefit and meaningless difference

- c. Low number of patients included. Lower 95%CI does not exclude a meaningless difference
- d. Indirect (surrogate) measure of efficacy
- e. No information on control group. Frequency based on very limited number of patients and events. The expected frequency of this adverse events in no-treatment is zero however it is not clear that these figures reflect an accurate measure.

### **References**

1. Morice AH1, Menon MS, Mulrennan SA, Everett CF, Wright C, Jackson J, Thompson R. Opiate therapy in chronic cough. Am J Respir Crit Care Med. 2007 Feb 15;175(4):312-5.

## Summary of finding table including GRADE assessment (GRADE Evidence Profile) - GABAPENTIN

| Certainty assessment                                                                                                                                                                                                   |                   |              |                          |                      |                           |                      | № of patients    |                 | Effect                     |                                                  | Certainty        | Importance |
|------------------------------------------------------------------------------------------------------------------------------------------------------------------------------------------------------------------------|-------------------|--------------|--------------------------|----------------------|---------------------------|----------------------|------------------|-----------------|----------------------------|--------------------------------------------------|------------------|------------|
| № of studies                                                                                                                                                                                                           | Study design      | Risk of bias | Inconsistency            | Indirectness         | Imprecision               | Other considerations | Gabapentin       | Placebo         | Relative (95% CI)          | Absolute (95% CI)                                |                  |            |
| Quality of life specific questionnaires – LCQ (Leicester Cough Questionnaire). Follow-up: 8 weeks on treatment. Range 3 to 21 points; higher scores indicate better quality of life. MID is estimated to be 1.3 points |                   |              |                          |                      |                           |                      |                  |                 |                            |                                                  |                  |            |
| 1 <sup>1</sup>                                                                                                                                                                                                         | randomised trials | not serious  | not serious <sup>a</sup> | not serious          | serious <sup>b</sup>      | none                 | 32               | 30              | -                          | MD 1.8 higher<br>(3.04 higher to 0.56 higher)    | ⊕⊕⊕○<br>MODERATE | CRITICAL   |
| Cough frequency at 8 weeks of treatment (number of coughs/h)                                                                                                                                                           |                   |              |                          |                      |                           |                      |                  |                 |                            |                                                  |                  |            |
| 1 <sup>1</sup>                                                                                                                                                                                                         | randomised trials | not serious  | not serious <sup>a</sup> | not serious          | serious <sup>c</sup>      | none                 | 32               | 30              | -                          | MD 27.31 lower<br>(51.75 lower to 2.87 lower)    | ⊕⊕⊕○<br>MODERATE | CRITICAL   |
| Cough severity at 8 weeks of treatment; assessed with VAS; Range 0 to 100 points; higher scores indicate better higher severity.                                                                                       |                   |              |                          |                      |                           |                      |                  |                 |                            |                                                  |                  |            |
| 1 <sup>1</sup>                                                                                                                                                                                                         | randomised trials | not serious  | not serious <sup>a</sup> | not serious          | serious <sup>c</sup>      | none                 | 32               | 30              | -                          | MD 12.23 lower<br>(23.23 lower to 1.23 lower)    | ⊕⊕⊕○<br>MODERATE | CRITICAL   |
| Capsaicin C5 at 8 weeks of treatment                                                                                                                                                                                   |                   |              |                          |                      |                           |                      |                  |                 |                            |                                                  |                  |            |
| 1 <sup>1</sup>                                                                                                                                                                                                         | randomised trials | not serious  | not serious <sup>a</sup> | serious <sup>d</sup> | serious <sup>e</sup>      | none                 | 32               | 30              | -                          | MD 3.12 lower<br>(19.84 lower to 13.6 higher)    | ⊕⊕○○<br>LOW      | IMPORTANT  |
| Any adverse reactions                                                                                                                                                                                                  |                   |              |                          |                      |                           |                      |                  |                 |                            |                                                  |                  |            |
| 1 <sup>1</sup>                                                                                                                                                                                                         | randomised trials | not serious  | not serious <sup>a</sup> | not serious          | very serious <sup>f</sup> | none                 | 17/32<br>(53.1%) | 6/30<br>(20.0%) | OR 4.53<br>(1.46 to 14.07) | 331 more per 1,000<br>(from 67 more to 579 more) | ⊕⊕○○<br>LOW      | CRITICAL   |
| Adverse event - Blurred vision                                                                                                                                                                                         |                   |              |                          |                      |                           |                      |                  |                 |                            |                                                  |                  |            |
| 1 <sup>1</sup>                                                                                                                                                                                                         | randomised trials | not serious  | not serious              | not serious          | very serious <sup>f</sup> | none                 | 1/32 (3.1%)      | 0/30 (0.0%)     | OR 2.90<br>(0.11 to 74.10) | -                                                | ⊕⊕○○<br>LOW      | CRITICAL   |
| Adverse event - Depression                                                                                                                                                                                             |                   |              |                          |                      |                           |                      |                  |                 |                            |                                                  |                  |            |

| Certainty assessment                 |                   |              |               |              |                           |                      | № of patients |             | Effect                             |                                                          | Certainty          | Importance |
|--------------------------------------|-------------------|--------------|---------------|--------------|---------------------------|----------------------|---------------|-------------|------------------------------------|----------------------------------------------------------|--------------------|------------|
| № of studies                         | Study design      | Risk of bias | Inconsistency | Indirectness | Imprecision               | Other considerations | Gabapentin    | Placebo     | Relative (95% CI)                  | Absolute (95% CI)                                        |                    |            |
| 1 <sup>1</sup>                       | randomised trials | not serious  | not serious   | not serious  | very serious <sup>f</sup> | none                 | 0/32 (0.0%)   | 1/30 (3.3%) | <b>OR 0.30</b><br>(0.01 to 7.72)   | <b>23 fewer per 1,000</b><br>(from 33 fewer to 177 more) | ⊕⊕○○<br><b>LOW</b> | CRITICAL   |
| Adverse event - Disorientation       |                   |              |               |              |                           |                      |               |             |                                    |                                                          |                    |            |
| 1 <sup>1</sup>                       | randomised trials | not serious  | not serious   | not serious  | very serious <sup>f</sup> | none                 | 2/32 (6.3%)   | 0/30 (0.0%) | <b>OR 5.00</b><br>(0.23 to 108.53) | -                                                        | ⊕⊕○○<br><b>LOW</b> | CRITICAL   |
| Adverse event - Dizziness            |                   |              |               |              |                           |                      |               |             |                                    |                                                          |                    |            |
| 1 <sup>1</sup>                       | randomised trials | not serious  | not serious   | not serious  | very serious <sup>f</sup> | none                 | 3/32 (9.4%)   | 1/30 (3.3%) | <b>OR 3.00</b><br>(0.29 to 30.56)  | <b>60 more per 1,000</b><br>(from 23 fewer to 480 more)  | ⊕⊕○○<br><b>LOW</b> | CRITICAL   |
| Adverse event - Dry mouth            |                   |              |               |              |                           |                      |               |             |                                    |                                                          |                    |            |
| 1 <sup>1</sup>                       | randomised trials | not serious  | not serious   | not serious  | very serious <sup>f</sup> | none                 | 2/32 (6.3%)   | 1/30 (3.3%) | <b>OR 1.93</b><br>(0.17 to 22.50)  | <b>29 more per 1,000</b><br>(from 28 fewer to 404 more)  | ⊕⊕○○<br><b>LOW</b> | CRITICAL   |
| Adverse event - Fatigue              |                   |              |               |              |                           |                      |               |             |                                    |                                                          |                    |            |
| 1 <sup>1</sup>                       | randomised trials | not serious  | not serious   | not serious  | very serious <sup>f</sup> | none                 | 3/32 (9.4%)   | 1/30 (3.3%) | <b>OR 3.00</b><br>(0.29 to 30.56)  | <b>60 more per 1,000</b><br>(from 23 fewer to 480 more)  | ⊕⊕○○<br><b>LOW</b> | CRITICAL   |
| Adverse event - Headache             |                   |              |               |              |                           |                      |               |             |                                    |                                                          |                    |            |
| 1 <sup>1</sup>                       | randomised trials | not serious  | not serious   | not serious  | very serious <sup>f</sup> | none                 | 1/32 (3.1%)   | 0/30 (0.0%) | <b>OR 2.90</b><br>(0.11 to 74.10)  | -                                                        | ⊕⊕○○<br><b>LOW</b> | CRITICAL   |
| Adverse event - Memory loss          |                   |              |               |              |                           |                      |               |             |                                    |                                                          |                    |            |
| 1 <sup>1</sup>                       | randomised trials | not serious  | not serious   | not serious  | very serious <sup>f</sup> | none                 | 1/32 (3.1%)   | 0/30 (0.0%) | <b>OR 2.90</b><br>(0.11 to 74.10)  | -                                                        | ⊕⊕○○<br><b>LOW</b> | CRITICAL   |
| Adverse event - Nausea, stomach pain |                   |              |               |              |                           |                      |               |             |                                    |                                                          |                    |            |

| Certainty assessment |                   |              |               |              |                           |                      | № of patients |             | Effect                            |                                                         | Certainty          | Importance |
|----------------------|-------------------|--------------|---------------|--------------|---------------------------|----------------------|---------------|-------------|-----------------------------------|---------------------------------------------------------|--------------------|------------|
| № of studies         | Study design      | Risk of bias | Inconsistency | Indirectness | Imprecision               | Other considerations | Gabapentin    | Placebo     | Relative (95% CI)                 | Absolute (95% CI)                                       |                    |            |
| 1 <sup>1</sup>       | randomised trials | not serious  | not serious   | not serious  | very serious <sup>f</sup> | none                 | 4/32 (12.5%)  | 2/30 (6.7%) | <b>OR 2.00</b><br>(0.34 to 11.82) | <b>58 more per 1,000</b><br>(from 43 fewer to 391 more) | ⊕⊕○○<br><b>LOW</b> | CRITICAL   |

**CI:** Confidence interval; **MD:** Mean difference; **OR:** Odds ratio

### Explanations

- Single study
- Low number of patients included. 95%CI includes a clinically important / large benefit and meaningless difference
- Low number of patients included. Lower 95%CI does not exclude a meaningless difference
- Indirect (surrogate) measure of efficacy
- Low number of patients included. Lower 95%CI includes both benefit or harm
- Very low number of events.

### References

- Ryan NM<sup>1</sup>, Birring SS, Gibson PG. Gabapentin for refractory chronic cough: a randomised, double-blind, placebo-controlled trial. Lancet. 2012 Nov 3;380(9853):1583-9.

### Summary of finding table including GRADE assessment (GRADE Evidence Profile) - PREGABALIN

| Certainty assessment                                                                                                                                                                                                    |                   |                          |                          |                      |                           |                      | № of patients   |                | Effect                     |                                                   | Certainty        | Importance |
|-------------------------------------------------------------------------------------------------------------------------------------------------------------------------------------------------------------------------|-------------------|--------------------------|--------------------------|----------------------|---------------------------|----------------------|-----------------|----------------|----------------------------|---------------------------------------------------|------------------|------------|
| № of studies                                                                                                                                                                                                            | Study design      | Risk of bias             | Inconsistency            | Indirectness         | Imprecision               | Other considerations | Pregabalin      | Placebo        | Relative (95% CI)          | Absolute (95% CI)                                 |                  |            |
| Quality of life specific questionnaires – LCQ (Leicester Cough Questionnaire). Follow-up: 14 weeks on treatment. Range 3 to 21 points; higher scores indicate better quality of life. MID is estimated to be 1.3 points |                   |                          |                          |                      |                           |                      |                 |                |                            |                                                   |                  |            |
| 1                                                                                                                                                                                                                       | randomised trials | not serious <sup>a</sup> | not serious <sup>b</sup> | not serious          | serious <sup>c</sup>      | none                 | 20              | 20             | -                          | MD 3.5 higher<br>(5.89 higher to 1.11 higher)     | ⊕⊕⊕○<br>MODERATE | CRITICAL   |
| Cough frequency at 14 weeks of treatment (number of coughs/h)                                                                                                                                                           |                   |                          |                          |                      |                           |                      |                 |                |                            |                                                   |                  |            |
| 1                                                                                                                                                                                                                       | randomised trials | not serious <sup>a</sup> | not serious <sup>b</sup> | not serious          | serious <sup>d</sup>      | none                 | 20              | 20             | -                          | MD 2.3 lower<br>(13.58 lower to 8.98 higher)      | ⊕⊕⊕○<br>MODERATE | CRITICAL   |
| Cough severity at 14 weeks of treatment; assessed with VAS; Range 0 to 100 points; higher scores indicate better higher severity.                                                                                       |                   |                          |                          |                      |                           |                      |                 |                |                            |                                                   |                  |            |
| 1                                                                                                                                                                                                                       | randomised trials | not serious <sup>a</sup> | not serious <sup>b</sup> | not serious          | serious <sup>c</sup>      | none                 | 20              | 20             | -                          | MD 25.1 lower<br>(39.6 lower to 10.6 lower)       | ⊕⊕⊕○<br>MODERATE | CRITICAL   |
| Capsaicin C5 at 14 weeks of treatment                                                                                                                                                                                   |                   |                          |                          |                      |                           |                      |                 |                |                            |                                                   |                  |            |
| 1                                                                                                                                                                                                                       | randomised trials | not serious <sup>a</sup> | not serious <sup>b</sup> | serious <sup>e</sup> | serious <sup>d</sup>      | none                 | 20              | 20             | -                          | MD 47 lower<br>(174.35 lower to 80.35 higher)     | ⊕⊕○○<br>LOW      | IMPORTANT  |
| Adverse event - Blurred vision                                                                                                                                                                                          |                   |                          |                          |                      |                           |                      |                 |                |                            |                                                   |                  |            |
| 1                                                                                                                                                                                                                       | randomised trials | not serious              | not serious <sup>b</sup> | not serious          | very serious <sup>f</sup> | none                 | 4/20<br>(20.0%) | 1/20<br>(5.0%) | OR 4.75<br>(0.48 to 46.91) | 150 more per 1,000<br>(from 25 fewer to 662 more) | ⊕⊕○○<br>LOW      | CRITICAL   |
| Adverse event - Cognitive changes                                                                                                                                                                                       |                   |                          |                          |                      |                           |                      |                 |                |                            |                                                   |                  |            |
| 1                                                                                                                                                                                                                       | randomised trials | not serious              | not serious <sup>b</sup> | not serious          | very serious <sup>f</sup> | none                 | 6/20<br>(30.0%) | 1/20<br>(5.0%) | OR 8.14<br>(0.88 to 75.48) | 250 more per 1,000<br>(from 6 fewer to 749 more)  | ⊕⊕○○<br>LOW      | CRITICAL   |
| Adverse event - Dizziness                                                                                                                                                                                               |                   |                          |                          |                      |                           |                      |                 |                |                            |                                                   |                  |            |

| Certainty assessment              |                   |              |                          |              |                           |                      | № of patients |              | Effect                              |                                                            | Certainty                                                                                           | Importance |
|-----------------------------------|-------------------|--------------|--------------------------|--------------|---------------------------|----------------------|---------------|--------------|-------------------------------------|------------------------------------------------------------|-----------------------------------------------------------------------------------------------------|------------|
| № of studies                      | Study design      | Risk of bias | Inconsistency            | Indirectness | Imprecision               | Other considerations | Pregabalin    | Placebo      | Relative (95% CI)                   | Absolute (95% CI)                                          |                                                                                                     |            |
| 1                                 | randomised trials | not serious  | not serious <sup>b</sup> | not serious  | very serious <sup>f</sup> | none                 | 9/20 (45.0%)  | 1/20 (5.0%)  | <b>OR 15.55</b><br>(1.73 to 139.65) | <b>400 more per 1,000</b><br>(from 33 more to 830 more)    | <br><b>LOW</b>   | CRITICAL   |
| Adverse event - Dry mouth         |                   |              |                          |              |                           |                      |               |              |                                     |                                                            |                                                                                                     |            |
| 1                                 | randomised trials | not serious  | not serious              | not serious  | very serious <sup>f</sup> | none                 | 2/20 (10.0%)  | 1/20 (5.0%)  | <b>OR 2.11</b><br>(0.18 to 25.35)   | <b>50 more per 1,000</b><br>(from 41 fewer to 522 more)    | <br><b>LOW</b>   | CRITICAL   |
| Adverse event - Fatigue           |                   |              |                          |              |                           |                      |               |              |                                     |                                                            |                                                                                                     |            |
| 1                                 | randomised trials | not serious  | not serious              | not serious  | very serious <sup>f</sup> | none                 | 7/20 (35.0%)  | 6/20 (30.0%) | <b>OR 1.26</b><br>(0.33 to 4.73)    | <b>51 more per 1,000</b><br>(from 176 fewer to 370 more)   | <br><b>LOW</b>   | CRITICAL   |
| Adverse event - Headache          |                   |              |                          |              |                           |                      |               |              |                                     |                                                            |                                                                                                     |            |
| 1                                 | randomised trials | not serious  | not serious              | not serious  | very serious <sup>f</sup> | none                 | 0/20 (0.0%)   | 2/20 (10.0%) | <b>OR 0.18</b><br>(0.01 to 4.01)    | <b>80 fewer per 1,000</b><br>(from 99 fewer to 208 more)   | <br><b>LOW</b>   | CRITICAL   |
| Adverse event - Weight gain       |                   |              |                          |              |                           |                      |               |              |                                     |                                                            |                                                                                                     |            |
| 1                                 | randomised trials | not serious  | not serious              | not serious  | very serious <sup>f</sup> | none                 | 5/20 (25.0%)  | 1/20 (5.0%)  | <b>OR 6.33</b><br>(0.67 to 60.16)   | <b>200 more per 1,000</b><br>(from 16 fewer to 710 more)   | <br><b>LOW</b>   | CRITICAL   |
| Adverse event - Sleep disturbance |                   |              |                          |              |                           |                      |               |              |                                     |                                                            |                                                                                                     |            |
| 1                                 | randomised trials | not serious  | not serious              | not serious  | very serious <sup>f</sup> | none                 | 0/20 (0.0%)   | 2/20 (10.0%) | <b>OR 0.18</b><br>(0.01 to 4.01)    | <b>80 fewer per 1,000</b><br>(from 99 fewer to 208 more)   | <br><b>LOW</b> | CRITICAL   |
| Adverse event - Gastrointestinal  |                   |              |                          |              |                           |                      |               |              |                                     |                                                            |                                                                                                     |            |
| 1                                 | randomised trials | not serious  | not serious              | not serious  | very serious <sup>f</sup> | none                 | 5/20 (25.0%)  | 7/20 (35.0%) | <b>OR 0.62</b><br>(0.16 to 2.43)    | <b>100 fewer per 1,000</b><br>(from 217 more to 271 fewer) | <br><b>LOW</b> | CRITICAL   |
| Adverse event - Respiratory       |                   |              |                          |              |                           |                      |               |              |                                     |                                                            |                                                                                                     |            |

| Certainty assessment                              |                   |              |               |              |                           |                      | № of patients |              | Effect                            |                                                          | Certainty          | Importance |
|---------------------------------------------------|-------------------|--------------|---------------|--------------|---------------------------|----------------------|---------------|--------------|-----------------------------------|----------------------------------------------------------|--------------------|------------|
| № of studies                                      | Study design      | Risk of bias | Inconsistency | Indirectness | Imprecision               | Other considerations | Pregabalin    | Placebo      | Relative (95% CI)                 | Absolute (95% CI)                                        |                    |            |
| 1                                                 | randomised trials | not serious  | not serious   | not serious  | very serious <sup>f</sup> | none                 | 3/20 (15.0%)  | 3/20 (15.0%) | <b>OR 1.00</b><br>(0.18 to 5.67)  | <b>0 fewer per 1,000</b><br>(from 119 fewer to 350 more) | ⊕⊕○○<br><b>LOW</b> | CRITICAL   |
| <b>Adverse event - Dermatological</b>             |                   |              |               |              |                           |                      |               |              |                                   |                                                          |                    |            |
| 1                                                 | randomised trials | not serious  | not serious   | not serious  | very serious <sup>f</sup> | none                 | 1/20 (5.0%)   | 2/20 (10.0%) | <b>OR 0.47</b><br>(0.04 to 5.69)  | <b>50 fewer per 1,000</b><br>(from 96 fewer to 287 more) | ⊕⊕○○<br><b>LOW</b> | CRITICAL   |
| <b>Adverse event - Fluid build-up</b>             |                   |              |               |              |                           |                      |               |              |                                   |                                                          |                    |            |
| 1                                                 | randomised trials | not serious  | not serious   | not serious  | very serious <sup>f</sup> | none                 | 2/20 (10.0%)  | 1/20 (5.0%)  | <b>OR 2.11</b><br>(0.18 to 25.35) | <b>50 more per 1,000</b><br>(from 41 fewer to 522 more)  | ⊕⊕○○<br><b>LOW</b> | CRITICAL   |
| <b>Adverse event - Tight leg and muscle cramp</b> |                   |              |               |              |                           |                      |               |              |                                   |                                                          |                    |            |
| 1                                                 | randomised trials | not serious  | not serious   | not serious  | very serious <sup>f</sup> | none                 | 2/20 (10.0%)  | 1/20 (5.0%)  | <b>OR 2.11</b><br>(0.18 to 25.35) | <b>50 more per 1,000</b><br>(from 41 fewer to 522 more)  | ⊕⊕○○<br><b>LOW</b> | CRITICAL   |

**CI:** Confidence interval; **MD:** Mean difference; **OR:** Odds ratio

### Explanations

- No comparison to pregabalin or placebo alone. Mean cough duration is longer in the placebo group (151 months) than in the pregabalin group (94 months). Mean baseline LCQ score is higher in the placebo group (12.3) than in the pregabalin group (10.8).
- Single study
- Low number of patients included. 95%CI includes a clinically important / large benefit and meaningless difference
- Low number of patients included. Lower 95%CI includes both benefit or harm
- Indirect (surrogate) measure of efficacy
- Very low number of events

### Refetrences

- Vertigan AE, Kapela SL, Ryan NM, Birring SS, McElduff P, Gibson PG. Pregabalin and Speech Pathology Combination Therapy for Refractory Chronic Cough: A Randomized Controlled Trial. Chest. 2016 Mar;149(3):639-48.



# Question 7: Should non-pharmacological therapy (cough control therapy) be used to treat patients with chronic cough?

## Summary of finding table including GRADE assessment (GRADE Evidence Profile)

| Certainty assessment                                                                                                                                                                                                   |                   |                      |                          |                      |                          |                      | № of patients                                                                                                                                                                                                                     |         | Effect            |                                                                  | Certainty               | Importance |
|------------------------------------------------------------------------------------------------------------------------------------------------------------------------------------------------------------------------|-------------------|----------------------|--------------------------|----------------------|--------------------------|----------------------|-----------------------------------------------------------------------------------------------------------------------------------------------------------------------------------------------------------------------------------|---------|-------------------|------------------------------------------------------------------|-------------------------|------------|
| № of studies                                                                                                                                                                                                           | Study design      | Risk of bias         | Inconsistency            | Indirectness         | Imprecision              | Other considerations | speech pathology interventions                                                                                                                                                                                                    | placebo | Relative (95% CI) | Absolute (95% CI)                                                |                         |            |
| Cough frequency at 4 weeks of treatment (number of coughs/h)                                                                                                                                                           |                   |                      |                          |                      |                          |                      |                                                                                                                                                                                                                                   |         |                   |                                                                  |                         |            |
| 1 <sup>1</sup>                                                                                                                                                                                                         | randomised trials | not serious          | not serious <sup>a</sup> | not serious          | not serious <sup>b</sup> | none                 | 31                                                                                                                                                                                                                                | 40      | -                 | MD <b>7 less</b><br>(8.34 less to 5.66 less)                     | ⊕⊕⊕○<br><b>MODERATE</b> | CRITICAL   |
| Cough severity at 4 weeks of treatment (assessed with different scales) Rules of thumb exist for interpreting SMDs: 0.2 represents a small effect, 0.5 a moderate effect, and 0.8 a large effect                       |                   |                      |                          |                      |                          |                      |                                                                                                                                                                                                                                   |         |                   |                                                                  |                         |            |
| 2 <sup>1,2</sup>                                                                                                                                                                                                       | randomised trials | serious <sup>c</sup> | not serious              | not serious          | not serious              | none                 | 74                                                                                                                                                                                                                                | 84      | -                 | SMD <b>0,61 less</b><br>(1.02 less to 0.20 less)                 | ⊕⊕⊕○<br><b>MODERATE</b> | IMPORTANT  |
| Cough severity at 4 weeks of treatment                                                                                                                                                                                 |                   |                      |                          |                      |                          |                      |                                                                                                                                                                                                                                   |         |                   |                                                                  |                         |            |
| 2 <sup>1,2</sup>                                                                                                                                                                                                       | randomised trials | serious <sup>c</sup> | not serious              | not serious          | not serious              | none                 | Chamberlain (2017): Mean difference between groups at 4 weeks -9.72 (-20.80 to 1.36) P=0.084 (VAS severity). Vertigan (2006): Mean difference between groups at 4 weeks 8.5 (95% CI 4.7 to 14.9) P<0.001 (23-item symptom score). |         |                   | ⊕⊕⊕○<br><b>MODERATE</b>                                          | CRITICAL                |            |
| Capsaicin C2 at 4 weeks of treatment                                                                                                                                                                                   |                   |                      |                          |                      |                          |                      |                                                                                                                                                                                                                                   |         |                   |                                                                  |                         |            |
| 1 <sup>1</sup>                                                                                                                                                                                                         | randomised trials | not serious          | not serious <sup>a</sup> | serious <sup>d</sup> | not serious              | none                 | 31                                                                                                                                                                                                                                | 40      | -                 | MD <b>1.11 C2 higher</b><br>(0.76 higher to 1.61 higher)         | ⊕⊕⊕○<br><b>MODERATE</b> | IMPORTANT  |
| Quality of life specific questionnaires – LCQ (Leicester Cough Questionnaire). Follow-up: 4 weeks on treatment. Range 3 to 21 points; higher scores indicate better quality of life. MID is estimated to be 1.3 points |                   |                      |                          |                      |                          |                      |                                                                                                                                                                                                                                   |         |                   |                                                                  |                         |            |
| 1 <sup>1</sup>                                                                                                                                                                                                         | randomised trials | serious <sup>c</sup> | not serious <sup>a</sup> | not serious          | serious <sup>e</sup>     | none                 | 31                                                                                                                                                                                                                                | 40      | -                 | MD <b>1.53 LCQ points higher</b><br>(0.21 higher to 2.85 higher) | ⊕⊕○○<br><b>LOW</b>      | CRITICAL   |

| Certainty assessment        |                   |              |                          |              |             |                      | № of patients                  |         | Effect            |                   | Certainty    | Importance |
|-----------------------------|-------------------|--------------|--------------------------|--------------|-------------|----------------------|--------------------------------|---------|-------------------|-------------------|--------------|------------|
| № of studies                | Study design      | Risk of bias | Inconsistency            | Indirectness | Imprecision | Other considerations | speech pathology interventions | placebo | Relative (95% CI) | Absolute (95% CI) |              |            |
| Adverse events              |                   |              |                          |              |             |                      |                                |         |                   |                   |              |            |
| 1 <sup>1</sup>              | randomised trials | not serious  | not serious <sup>a</sup> | not serious  | not serious | none                 | None observed                  |         |                   |                   | ⊕⊕⊕⊕<br>HIGH | IMPORTANT  |
| Incontinence – not measured |                   |              |                          |              |             |                      |                                |         |                   |                   |              |            |
|                             |                   |              |                          |              |             |                      |                                |         |                   |                   | -            | CRITICAL   |

**CI:** Confidence interval; **MD:** Mean difference

### Explanations

- Single study
- Low number of patients included, most probably underpowered to detect differences.
- Single blinded study (patients were not aware of the intervention assignment), bias cannot be excluded for subjective outcomes
- Indirect (surrogate) measure of efficacy
- Low number of patients included. 95%CI includes a clinically important / large benefit and meaningless difference

### References:

- Chamberlain Mitchell, S. A., et al. (2017). "Physiotherapy, and speech and language therapy intervention for patients with refractory chronic cough: a multicentre randomised control trial." Thorax 72(2): 129-136.
- Vertigan, A., et al. (2006) Efficacy of speech pathology management for chronic cough: a randomised placebo controlled trial of treatment efficacy. Thorax 61, 1065-1069

**Question 8: Should a trial of antibiotics be used in children with chronic wet cough with normal chest x ray, normal spirometry and no warning signs?**

| Certainty assessment                                                                                                                                                                                                                                                                                                                                                                       |                   |              |               |                      |                           |                      | N of patients     |                  | Effect                  |                                                       | Certainty                                                | Importance       |           |
|--------------------------------------------------------------------------------------------------------------------------------------------------------------------------------------------------------------------------------------------------------------------------------------------------------------------------------------------------------------------------------------------|-------------------|--------------|---------------|----------------------|---------------------------|----------------------|-------------------|------------------|-------------------------|-------------------------------------------------------|----------------------------------------------------------|------------------|-----------|
| No of studies                                                                                                                                                                                                                                                                                                                                                                              | Study design      | Risk of bias | Inconsistency | Indirectness         | Imprecision               | Other considerations | With no treatment | With antibiotics | Relative (95% CI)       | Absolute (95% CI)                                     |                                                          |                  |           |
| Cough resolution rate: >75% reduction in cough score after 14 days or cessation of coughing for >3 days within the trial (=treatment) period (assessed with VCD score)                                                                                                                                                                                                                     |                   |              |               |                      |                           |                      |                   |                  |                         |                                                       |                                                          |                  |           |
| 1 <sup>1</sup>                                                                                                                                                                                                                                                                                                                                                                             | randomized trials | not serious  | not serious   | serious <sup>a</sup> | serious <sup>b</sup>      | none                 | 4/25 (16.0%)      | 12/25 (48.0%)    | RR 3.00 (1.12 to 8.05)  | 320 more per 1.000 (19 more to 1.000 more)            | ⊕⊕○○<br>LOW                                              | CRITICAL         |           |
| Change in cough score (VCD score) after 14 days (VCD cough score from 0 to 5: 0=no cough, 1=cough for one or two short periods only, 2=cough for more than two short periods, 3=frequent coughing but does not interfere with school and other activities, 4=frequent coughing which interferes with school and other activities, 5=cannot perform most activities due to severe coughing) |                   |              |               |                      |                           |                      |                   |                  |                         |                                                       |                                                          |                  |           |
| 1 <sup>1</sup>                                                                                                                                                                                                                                                                                                                                                                             | randomized trials | not serious  | not serious   | serious <sup>a</sup> | serious <sup>b</sup>      | none                 | 24 <sup>c</sup>   | 23 <sup>c</sup>  | -                       | MD 0.96 lower <sup>e</sup> (1.88 lower to 0.04 lower) | ⊕⊕○○<br>LOW                                              | CRITICAL         |           |
| Adverse event: mild diarrhoea                                                                                                                                                                                                                                                                                                                                                              |                   |              |               |                      |                           |                      |                   |                  |                         |                                                       |                                                          |                  |           |
| 1 <sup>1</sup>                                                                                                                                                                                                                                                                                                                                                                             | randomized trials | not serious  | not serious   | serious <sup>a</sup> | very serious <sup>f</sup> | none                 | 2/25 (8.0%)       | 5/25 (20.0%)     | RR 2.50 (0.53 to 11.70) | 120 more per 1.000 (38 fewer to 856 more)             | ⊕○○○<br>VERY LOW                                         | IMPORTANT        |           |
| Adverse event: vomiting                                                                                                                                                                                                                                                                                                                                                                    |                   |              |               |                      |                           |                      |                   |                  |                         |                                                       |                                                          |                  |           |
| 1 <sup>1</sup>                                                                                                                                                                                                                                                                                                                                                                             | randomized trials | not serious  | not serious   | serious <sup>a</sup> | very serious <sup>f</sup> | none                 | 0/25 (0.0%)       | 1/25 (4.0%)      | RR 3.00 (0.13 to 70.30) | Study population<br>0 per 1.000                       | 0 fewer per 1.000 (from 0 fewer to 0 fewer) <sup>g</sup> | ⊕○○○<br>VERY LOW | IMPORTANT |
|                                                                                                                                                                                                                                                                                                                                                                                            |                   |              |               |                      |                           |                      |                   |                  |                         | Low risk population <sup>h</sup><br>10 per 1.000      | 20 more per 1.000 (from 9 fewer to 693 more)             |                  |           |

CI: Confidence interval; RR: Risk Ratio; MD: mean difference; VCD: verbal category descriptive cough score.

## Explanations

- a. Children in both groups were very young (median 1.9 years), therefore, the study findings don't apply to the age group which should be addressed according to the ERS; additionally, chest x ray was abnormal in 15 out of 42 children; 8 children did not receive a chest x ray; an abnormal chest x ray also raises concerns about indirectness considering the PICO provided by the ERS; spirometry was not conducted (according to authors, measurement is not valid in children <6 years).
- b. Low number of included patients and few events.
- c. Outcome addresses change in cough score, which is not a binary outcome; therefore, no event rates can be provided.
- d. Change in cough score: in the primary study data were expressed as median and interquartile range (IQR); we calculated the mean change and standard deviation according to the methods described in Wan 2014.<sup>5</sup>
- e. Change is in favour of the antibiotic treatment.
- f. 95% CI was consistent with the possibility for benefit and the possibility of harm; additionally, (very) few events in both groups and a low number of included patients.
- g. Due to zero events in the control group, it was not possible to calculate the risk difference with antibiotics.
- h. Assumed baseline risk for a low risk population.

## References

1. Marchant J, Masters I, Champion A, Petsky H, Chang A. Randomised controlled trial of amoxycillin clavulanate in children with chronic wet cough. *Thorax* 2012;689-93.
